# Supplementary material for: Determining the scale at which variation in a single gene changes population yields
Source: eLife. 2020 Feb 14;9:e53517. doi: 10.7554/eLife.53517 (PMC7136025; doi:10.7554/eLife.53517)
Supplement: Figure 2—figure supplement 1—source data 1. [file elife-53517-fig2-figsupp1-data1.xlsx]

## Sheet: Feuil1
Figure 2-figure supplement 1 Top Panel					Figure 2-figure supplement 1 Bottom Panel
Tissue	Potting	Genotype	MPK4 Relative Transcript Abundance		Tissue	Potting	Genotype	MPK4 Relative Transcript Abundance
Leaf	Single	MPK4/MPK4	0.120193205572146		Roots	Comp	EV/MPK4	0.444282428383152
Leaf	Comp	EV/EV	0.962448426706282		Roots	Comp	MPK4/MPK4	0.203111157303195
Leaf	Comp	MPK4/MPK4	0.238718740428373		Roots	Single	EV/EV	0.33090237529236
Leaf	Single	EV/MPK4	0.976583978487082		Roots	Comp	EV/EV	1.17413866850878
Leaf	Comp	MPK4/MPK4	0.256517040902162		Roots	Single	MPK4/MPK4	0.0350352953083382
Leaf	Single	EV/EV	0.950025779378312		Roots	Comp	EV/MPK4	0.401351662490276
Leaf	Single	MPK4/MPK4	0.204701712454214		Roots	Single	EV/EV	0.111976760885617
Leaf	Comp	EV/MPK4	0.959801123097075		Roots	Single	EV/MPK4	0.157128665806926
Leaf	Comp	EV/EV	1.35991127175237		Roots	Comp	EV/MPK4	0.246454326357068
Leaf	Single	EV/MPK4	1.88585750101977		Roots	Comp	EV/EV	1.23956796305961
Leaf	Single	EV/MPK4	0.835842561689983		Roots	Comp	EV/EV	0.533938121301798
Leaf	Comp	EV/MPK4	1.18682635616033		Roots	Single	MPK4/MPK4	0.155674565532298
Leaf	Single	MPK4/MPK4	0.218061328496883		Roots	Comp	MPK4/MPK4	0.212778023028918
Leaf	Comp	MPK4/MPK4	0.425654185822645		Roots	Single	EV/MPK4	0.0245496038371653
Leaf	Single	EV/MPK4	1.61775888566897		Roots	Comp	EV/MPK4	0.0403516058172103
Leaf	Single	EV/EV	1.08252870658622		Roots	Single	EV/MPK4	0.0211725672213878
Leaf	Comp	EV/EV	1.89328050588201		Roots	Comp	MPK4/MPK4	0.0726915282672458
Leaf	Single	EV/MPK4	0.883634309450411		Roots	Single	EV/EV	0.788450889112461
Leaf	Comp	EV/MPK4	0.855406382777093		Roots	Comp	EV/MPK4	0.105140146454969
Leaf	Comp	EV/MPK4	1.39170876337094		Roots	Comp	MPK4/MPK4	0.428874489357474
Leaf	Comp	EV/MPK4	1.07665538065333		Roots	Comp	EV/MPK4	0.219415533202024
Leaf	Comp	EV/EV	1.40801470932586		Roots	Comp	EV/EV	0.372158006048708
Leaf	Comp	EV/MPK4	1.39594432363797		Roots	Single	EV/EV	0.66217673515121
Leaf	Single	MPK4/MPK4	0.204835270896858
Leaf	Comp	EV/EV	1.46239091718997
Leaf	Single	EV/EV	1.08073608063366
Leaf	Comp	MPK4/MPK4	0.197226454992501
Leaf	Single	EV/EV	1.27250732313271
Leaf	Single	MPK4/MPK4	0.181274499176252
Leaf	Comp	EV/MPK4	0.92412658856603
Leaf	Single	MPK4/MPK4	0.171512363010974
Leaf	Single	EV/MPK4	0.81122390529484
Leaf	Single	EV/EV	1.44709755721935
Leaf	Comp	MPK4/MPK4	0.208705092387382
Leaf	Comp	MPK4/MPK4	0.167497300402324
