# Supplementary material for: Determining the scale at which variation in a single gene changes population yields
Source: eLife. 2020 Feb 14;9:e53517. doi: 10.7554/eLife.53517 (PMC7136025; doi:10.7554/eLife.53517)
Supplement: Figure 2—source data 1. [file elife-53517-fig2-data1.xlsx]

## Sheet: Feuil1
Figure 2C Left Panel				Figure 2C Middle Panel
% irMPK4 in Population	Genotype	MPK4 Relative Transcript Abundance		Genotype	AMF Interaction	Replicate	Sample Number	% RLC
75	EVxCC	2.08535		EV	Yes	5	1	82.63
100	MPxCC	0.226569		EV	No	6	2	27.03
25	EVxCC	2.1391		MPxEV	Yes	7	3	93.01
25	MPxCC	0.34951		EV	Yes	1	4	94.88
25	MPxCC	0.163266		EVxCC	No	8	5	21.62
100	MPxCC	0.278574		MPxCC	Yes	2	6	10.28
75	MPxCC	0.141857		MPxCC	No	6	7	14.15
25	MPxCC	0.174269		MPxEV	Yes	3	8	94.54
0	EVxCC	2.30939		MPxCC	Yes	1	10	37.17
75	MPxCC	0.286563		MPxCC	No	1	11	21.3
25	EVxCC	2.63015		MPxCC	Yes	6	12	37.4
25	MPxCC	0.224449		EV	Yes	8	13	97.32
75	MPxCC	0.425903		MPxEV	No	7	16	0
75	EVxCC	2.06845		EVxCC	No	7	17	0
75	EVxCC	1.57581		EVxCC	Yes	5	18	45.16
0	EVxCC	2.69371		EV	No	8	19	14.71
0	EVxCC	2.01391		EVxCC	No	3	20	1.98
25	EVxCC	3.09333		MPxCC	Yes	7	21	29.31
75	MPxCC	0.204567		EVxCC	Yes	4	24	1
100	MPxCC	0.309995		MPxCC	No	4	25	0
100	MPxCC	1.16103		MPxEV	Yes	8	27	82.27
25	MPxCC	0.300207		EV	No	5	28	27.12
				MPxEV	No	6	29	0
				MPxEV	Yes	5	30	50.75
				EVxCC	No	4	32	16.83
				MPxEV	Yes	4	33	95.32
				EV	No	7	36	0
				EVxCC	Yes	2	37	26.13
				MPxEV	Yes	2	38	93.22
				EVxCC	Yes	7	39	59.87
				MPxEV	Yes	6	40	69.47
				MPxCC	No	5	41	0
				MPxCC	Yes	3	42	42.42
				MPxCC	Yes	4	43	23.42
				EV	No	2	44	0
				MPxEV	Yes	1	45	88.01
				EVxCC	No	6	46	15.69
				EV	No	1	47	16.98
				EVxCC	Yes	8	48	33.33
				EV	Yes	6	50	89.52
				EVxCC	No	5	51	10
				EV	Yes	7	54	69.63
				EVxCC	Yes	6	57	0
				EV	Yes	2	58	91.32
				EVxCC	Yes	1	59	65.43
				EV	Yes	3	60	88.03
				MPxCC	Yes	8	61	62.43
				EV	Yes	4	63	94.3
				MPxCC	No	7	31	28.18
				MPxCC	No	8	35	48
				MPxEV	No	8	49	51.52
				MPxEV	No	3	14	26.32
				MPxEV	No	2	23	30.51
				EV	No	4	34	2
				MPxEV	No	4	53	42.24
				MPxEV	No	1	9	52.89
				MPxCC	No	3	26	40.83
				EV	No	3	55	23.36
				MPxCC	Yes	5	56	38.71
				MPxCC	No	2	15	33.64
				EVxCC	No	2	22	32.74
