# Supplementary material for: Determining the scale at which variation in a single gene changes population yields
Source: eLife. 2020 Feb 14;9:e53517. doi: 10.7554/eLife.53517 (PMC7136025; doi:10.7554/eLife.53517)
Supplement: Figure 3—figure supplement 3—source data 1. [file elife-53517-fig3-figsupp3-data1.xlsx]

## Sheet: Feuil1
Figure 3-figure supplement 3A					Figure 3-figure supplement 3B					Figure 3-figure supplement 3C					Figure 3-figure supplement 3D					Figure 3-figure supplement 3E					Figure 3-figure supplement 3F					Figure 3-figure supplement 3G					Figure 3-figure supplement 3H					Figure 3-figure supplement 3I
% irMPK4 in Population	Population Location (Row/Column)	Depth (cm)	Total Carbon (mg/kg)		% irMPK4 in Population	Population Location (Row/Column)	Depth (cm)	Total Nitrogen (mg/kg)		% irMPK4 in Population	Population Location (Row/Column)	Depth (cm)	Inorganic Carbon (mg/kg)		% irMPK4 in Population	Population Location (Row/Column)	Depth (cm)	Organic Carbon (mg/kg)		% irMPK4 in Population	Population Location (Row/Column)	Depth (cm)	Copper (mg/kg)		% irMPK4 in Population	Population Location (Row/Column)	Depth (cm)	Iron (mg/kg)		% irMPK4 in Population	Population Location (Row/Column)	Depth (cm)	Phosphorus (mg/kg)		% irMPK4 in Population	Population Location (Row/Column)	Depth (cm)	Potassium (mg/kg)		% irMPK4 in Population	Population Location (Row/Column)	Depth (cm)	Zinc (mg/kg)
0	2019-01-04	15	8.52		0	2019-01-04	15	0.38		0	2019-01-04	15	5.13		0	2019-01-04	15	3.56		0	2019-01-04	5	20		0	2019-01-04	5	25752		0	2019-01-04	5	935		0	2019-01-04	5	26577		0	2019-01-04	5	93.5
0	2019-01-04	15	8.85		0	2019-01-04	15	0.43		0	2019-01-04	30	4.7		0	2019-01-04	30	1.49		0	2019-01-04	15	17.9		0	2019-01-04	15	25875		0	2019-01-04	15	919		0	2019-01-04	15	26224		0	2019-01-04	15	93.8
0	2019-01-04	30	6.27		0	2019-01-04	30	0.19		0	2019-01-04	30	4.65		0	2019-01-04	30	1.52		0	2019-01-04	30	16.1		0	2019-01-04	30	25335		0	2019-01-04	30	800		0	2019-01-04	30	27012		0	2019-01-04	30	89.5
0	2019-01-04	30	6.1		0	2019-01-04	30	0.2		0	2019-01-04	5	5.07		0	2019-01-04	5	3.89		25	2019-01-06	5	19.2		25	2019-01-06	5	25879		25	2019-01-06	5	917		25	2019-01-06	5	26386		25	2019-01-06	5	94.5
0	2019-01-04	30	6.38		0	2019-01-04	30	0.2		0	2019-03-09	15	4.45		0	2019-03-09	15	2.01		25	2019-01-06	15	17.8		25	2019-01-06	15	24760		25	2019-01-06	15	866		25	2019-01-06	15	25321		25	2019-01-06	15	93.1
0	2019-01-04	30	5.96		0	2019-01-04	30	0.22		0	2019-03-09	15	4.98		0	2019-03-09	15	1.42		25	2019-01-06	30	18.1		25	2019-01-06	30	24812		25	2019-01-06	30	818		25	2019-01-06	30	26556		25	2019-01-06	30	87.6
0	2019-01-04	5	9.12		0	2019-01-04	5	0.4		0	2019-03-09	30	4.59		0	2019-03-09	30	1.58		75	2019-01-08	5	18.4		75	2019-01-08	5	24795		75	2019-01-08	5	897		75	2019-01-08	5	25287		75	2019-01-08	5	95.9
0	2019-01-04	5	8.79		0	2019-01-04	5	0.38		0	2019-03-09	5	5.05		0	2019-03-09	5	3.53		75	2019-01-08	15	18.2		75	2019-01-08	15	24612		75	2019-01-08	15	873		75	2019-01-08	15	25221		75	2019-01-08	15	95
0	2019-03-09	15	6.43		0	2019-03-09	15	0.2		25	2019-05-11	15	5.2		25	2019-05-11	15	3.93		75	2019-01-08	30	17		75	2019-01-08	30	24204		75	2019-01-08	30	790		75	2019-01-08	30	26253		75	2019-01-08	30	88.5
0	2019-03-09	15	6.48		0	2019-03-09	15	0.19		25	2019-05-11	30	4.49		25	2019-05-11	30	1.65		0	2019-03-09	5	20.3		0	2019-03-09	5	24950		0	2019-03-09	5	892		0	2019-03-09	5	25262		0	2019-03-09	5	99.9
0	2019-03-09	15	6.49		0	2019-03-09	15	0.19		25	2019-05-11	30	4.5		25	2019-05-11	30	1.73		0	2019-03-09	15	18.5		0	2019-03-09	15	25484		0	2019-03-09	15	855		0	2019-03-09	15	26288		0	2019-03-09	15	107
0	2019-03-09	15	6.29		0	2019-03-09	15	0.19		25	2019-05-11	5	4.6		25	2019-05-11	5	3.78		0	2019-03-09	30	17.5		0	2019-03-09	30	24530		0	2019-03-09	30	780		0	2019-03-09	30	26081		0	2019-03-09	30	101
0	2019-03-09	30	6.24		0	2019-03-09	30	0.16		25	2019-01-15	15	4.59		25	2019-01-15	15	3.09		25	2019-04-09	5	18.5		25	2019-04-09	5	24979		25	2019-04-09	5	897		25	2019-04-09	5	25594		25	2019-04-09	5	97.8
0	2019-03-09	30	6.1		0	2019-03-09	30	0.17		25	2019-01-15	30	4.68		25	2019-01-15	30	1.89		25	2019-04-09	15	17.9		25	2019-04-09	15	25576		25	2019-04-09	15	848		25	2019-04-09	15	25952		25	2019-04-09	15	102
0	2019-03-09	5	8.79		0	2019-03-09	5	0.39		25	2019-01-15	30	5.11		25	2019-01-15	30	1.65		25	2019-04-09	30	16.7		25	2019-04-09	30	24782		25	2019-04-09	30	785		25	2019-04-09	30	26101		25	2019-04-09	30	96.8
0	2019-03-09	5	8.38		0	2019-03-09	5	0.38		25	2019-01-15	5	4.78		25	2019-01-15	5	3.59		25	2019-05-11	5	19.5		25	2019-05-11	5	25946		25	2019-05-11	5	914		25	2019-05-11	5	25707		25	2019-05-11	5	114
25	2019-05-11	15	9.02		25	2019-05-11	15	0.45		25	2019-04-19	15	4.88		25	2019-04-19	15	4.14		25	2019-05-11	15	20.5		25	2019-05-11	15	24797		25	2019-05-11	15	877		25	2019-05-11	15	25358		25	2019-05-11	15	105
25	2019-05-11	15	9.24		25	2019-05-11	15	0.44		25	2019-04-19	15	4.8		25	2019-04-19	15	4.17		25	2019-05-11	30	19		25	2019-05-11	30	25135		25	2019-05-11	30	788		25	2019-05-11	30	25857		25	2019-05-11	30	108
25	2019-05-11	30	6.08		25	2019-05-11	30	0.2		25	2019-04-19	30	5.14		25	2019-04-19	30	1.77		75	2019-05-13	5	18.8		75	2019-05-13	5	25104		75	2019-05-13	5	939		75	2019-05-13	5	26129		75	2019-05-13	5	117
25	2019-05-11	30	6.2		25	2019-05-11	30	0.19		25	2019-04-19	5	4.81		25	2019-04-19	5	3.9		75	2019-05-13	15	18.9		75	2019-05-13	15	25464		75	2019-05-13	15	917		75	2019-05-13	15	25932		75	2019-05-13	15	120
25	2019-05-11	30	6.23		25	2019-05-11	30	0.21		25	2019-01-28	15	4.68		25	2019-01-28	15	2.2		75	2019-05-13	30	17.2		75	2019-05-13	30	25249		75	2019-05-13	30	829		75	2019-05-13	30	27597		75	2019-05-13	30	126
25	2019-05-11	5	8.44		25	2019-05-11	5	0.37		25	2019-01-28	30	4.76		25	2019-01-28	30	3.35		25	2019-01-15	5	17.5		25	2019-01-15	5	24980		25	2019-01-15	5	881		25	2019-01-15	5	26634		25	2019-01-15	5	97.9
25	2019-05-11	5	8.32		25	2019-05-11	5	0.37		25	2019-01-28	5	5.33		25	2019-01-28	5	1.78		25	2019-01-15	15	19.7		25	2019-01-15	15	25887		25	2019-01-15	15	893		25	2019-01-15	15	27199		25	2019-01-15	15	104
25	2019-05-11	5	8.32		25	2019-05-11	5	0.36		25	2019-01-06	15	5.3		25	2019-01-06	15	2.59		25	2019-01-15	30	16.6		25	2019-01-15	30	25425		25	2019-01-15	30	831		25	2019-01-15	30	26925		25	2019-01-15	30	95.6
25	2019-01-15	15	7.67		25	2019-01-15	15	0.32		25	2019-01-06	15	5.17		25	2019-01-06	15	2.84		25	2019-04-19	5	18.1		25	2019-04-19	5	25562		25	2019-04-19	5	962		25	2019-04-19	5	27404		25	2019-04-19	5	100
25	2019-01-15	15	7.69		25	2019-01-15	15	0.32		25	2019-01-06	30	4.69		25	2019-01-06	30	1.47		25	2019-04-19	15	18.2		25	2019-04-19	15	25318		25	2019-04-19	15	967		25	2019-04-19	15	26622		25	2019-04-19	15	104
25	2019-01-15	30	6.62		25	2019-01-15	30	0.21		25	2019-01-06	5	5.15		25	2019-01-06	5	3.66		25	2019-04-19	30	16.6		25	2019-04-19	30	24690		25	2019-04-19	30	805		25	2019-04-19	30	26592		25	2019-04-19	30	95
25	2019-01-15	30	6.52		25	2019-01-15	30	0.21		25	2019-01-06	5	5.17		25	2019-01-06	5	3.61		100	2019-01-26	5	18.6		100	2019-01-26	5	26169		100	2019-01-26	5	925		100	2019-01-26	5	27045		100	2019-01-26	5	110
25	2019-01-15	30	6.68		25	2019-01-15	30	0.21		25	2019-04-09	15	4.59		25	2019-04-09	15	1.82		100	2019-01-26	15	19.5		100	2019-01-26	15	25458		100	2019-01-26	15	891		100	2019-01-26	15	26506		100	2019-01-26	15	108
25	2019-01-15	30	6.85		25	2019-01-15	30	0.25		25	2019-04-09	15	4.53		25	2019-04-09	15	1.81		100	2019-01-26	30	16.9		100	2019-01-26	30	25587		100	2019-01-26	30	837		100	2019-01-26	30	27552		100	2019-01-26	30	103
25	2019-01-15	5	8.28		25	2019-01-15	5	0.38		25	2019-04-09	30	4.45		25	2019-04-09	30	2.29		25	2019-01-28	5	17.4		25	2019-01-28	5	25642		25	2019-01-28	5	884		25	2019-01-28	5	26437		25	2019-01-28	5	100
25	2019-01-15	5	8.44		25	2019-01-15	5	0.38		25	2019-04-09	5	5.02		25	2019-04-09	5	3.47		25	2019-01-28	15	18.7		25	2019-01-28	15	26028		25	2019-01-28	15	898		25	2019-01-28	15	26883		25	2019-01-28	15	103
25	2019-04-19	15	9.03		25	2019-04-19	15	0.44		75	2019-05-13	15	4.95		75	2019-05-13	15	3.43		25	2019-01-28	30	19.4		25	2019-01-28	30	25741		25	2019-01-28	30	954		25	2019-01-28	30	26355		25	2019-01-28	30	113
25	2019-04-19	15	9.02		25	2019-04-19	15	0.46		75	2019-05-13	30	4.25		75	2019-05-13	30	1.48		100	2019-05-29	5	18.5		100	2019-05-29	5	25200		100	2019-05-29	5	886		100	2019-05-29	5	25439		100	2019-05-29	5	96.2
25	2019-04-19	15	8.97		25	2019-04-19	15	0.45		75	2019-05-13	30	4.27		75	2019-05-13	30	1.47		100	2019-05-29	15	18.4		100	2019-05-29	15	26347		100	2019-05-29	15	868		100	2019-05-29	15	26125		100	2019-05-29	15	99.5
25	2019-04-19	30	7.01		25	2019-04-19	30	0.17		75	2019-05-13	5	4.8		75	2019-05-13	5	3.81		100	2019-05-29	30	18.5		100	2019-05-29	30	26627		100	2019-05-29	30	829		100	2019-05-29	30	26411		100	2019-05-29	30	100
25	2019-04-19	30	6.82		25	2019-04-19	30	0.16		75	2019-01-08	15	5		75	2019-01-08	15	3.23		25	2019-01-06	5	19.3		25	2019-01-06	5	25493		25	2019-01-06	5	951		25	2019-01-06	5	26797		25	2019-01-06	5	110
25	2019-04-19	5	8.72		25	2019-04-19	5	0.41		75	2019-01-08	30	4.87		75	2019-01-08	30	1.62		25	2019-01-06	15	18.7		25	2019-01-06	15	24684		25	2019-01-06	15	873		25	2019-01-06	15	25868		25	2019-01-06	15	104
25	2019-04-19	5	8.71		25	2019-04-19	5	0.42		75	2019-01-08	5	4.83		75	2019-01-08	5	3.92		25	2019-01-06	30	17.9		25	2019-01-06	30	25303		25	2019-01-06	30	845		25	2019-01-06	30	27505		25	2019-01-06	30	107
25	2019-01-28	15	6.92		25	2019-01-28	15	0.24		100	2019-01-26	15	4.57		100	2019-01-26	15	3.2		25	2019-05-11	5	19.1		25	2019-05-11	5	25890		25	2019-05-11	5	955		25	2019-05-11	5	25958		25	2019-05-11	5	101
25	2019-01-28	15	6.85		25	2019-01-28	15	0.26		100	2019-01-26	30	4.93		100	2019-01-26	30	1.59		25	2019-05-11	15	17.3		25	2019-05-11	15	24704		25	2019-05-11	15	932		25	2019-05-11	15	25782		25	2019-05-11	15	113
25	2019-01-28	30	8.1		25	2019-01-28	30	0.38		100	2019-01-26	5	4.79		100	2019-01-26	5	3.78		25	2019-05-11	30	17		25	2019-05-11	30	24820		25	2019-05-11	30	819		25	2019-05-11	30	26108		25	2019-05-11	30	104
25	2019-01-28	30	8.13		25	2019-01-28	30	0.4		100	2019-05-29	15	4.29		100	2019-05-29	15	2.53		25	2019-04-19	5	19		25	2019-04-19	5	25212		25	2019-04-19	5	941		25	2019-04-19	5	25826		25	2019-04-19	5	114
25	2019-01-28	5	7.11		25	2019-01-28	5	0.17		100	2019-05-29	30	4.92		100	2019-05-29	30	1.72		25	2019-04-19	15	17.9		25	2019-04-19	15	24683		25	2019-04-19	15	928		25	2019-04-19	15	25230		25	2019-04-19	15	120
25	2019-01-28	5	7.12		25	2019-01-28	5	0.18		100	2019-05-29	5	5.17		100	2019-05-29	5	4.28		25	2019-04-19	30	18.4		25	2019-01-28	5	24843		25	2019-04-19	30	923		25	2019-04-19	30	28741		25	2019-04-19	30	104
25	2019-01-06	15	7.89		25	2019-01-06	15	0.29												25	2019-01-28	5	18.4		25	2019-01-28	15	25068		25	2019-01-28	5	853		25	2019-01-28	5	25550		25	2019-01-28	5	94.2
25	2019-01-06	15	7.88		25	2019-01-06	15	0.3												25	2019-01-28	15	17.5		25	2019-01-28	30	25054		25	2019-01-28	15	860		25	2019-01-28	15	25452		25	2019-01-28	15	90.8
25	2019-01-06	15	8.01		25	2019-01-06	15	0.32												25	2019-01-28	30	18.3							25	2019-01-28	30	911		25	2019-01-28	30	25878		25	2019-01-28	30	106
25	2019-01-06	30	6.23		25	2019-01-06	30	0.19
25	2019-01-06	30	6.1		25	2019-01-06	30	0.21
25	2019-01-06	5	8.67		25	2019-01-06	5	0.38
25	2019-01-06	5	8.94		25	2019-01-06	5	0.42
25	2019-01-06	5	8.78		25	2019-01-06	5	0.39
25	2019-04-09	15	6.55		25	2019-04-09	15	0.19
25	2019-04-09	15	6.27		25	2019-04-09	15	0.19
25	2019-04-09	15	6.35		25	2019-04-09	15	0.19
25	2019-04-09	15	6.33		25	2019-04-09	15	0.21
25	2019-04-09	30	6.77		25	2019-04-09	30	0.18
25	2019-04-09	30	6.73		25	2019-04-09	30	0.19
25	2019-04-09	5	8.63		25	2019-04-09	5	0.43
25	2019-04-09	5	8.36		25	2019-04-09	5	0.41
25	2019-04-09	5	8.43		25	2019-04-09	5	0.39
75	2019-05-13	15	8.41		75	2019-05-13	15	0.37
75	2019-05-13	15	8.36		75	2019-05-13	15	0.37
75	2019-05-13	30	5.74		75	2019-05-13	30	0.14
75	2019-05-13	30	5.73		75	2019-05-13	30	0.14
75	2019-05-13	30	5.73		75	2019-05-13	30	0.17
75	2019-05-13	5	8.67		75	2019-05-13	5	0.38
75	2019-05-13	5	8.56		75	2019-05-13	5	0.42
75	2019-01-08	15	8.38		75	2019-01-08	15	0.36
75	2019-01-08	15	8.09		75	2019-01-08	15	0.37
75	2019-01-08	30	6.49		75	2019-01-08	30	0.2
75	2019-01-08	30	6.49		75	2019-01-08	30	0.17
75	2019-01-08	5	8.86		75	2019-01-08	5	0.38
75	2019-01-08	5	8.64		75	2019-01-08	5	0.44
100	2019-01-26	15	7.64		100	2019-01-26	15	0.32
100	2019-01-26	15	7.89		100	2019-01-26	15	0.36
100	2019-01-26	30	6.54		100	2019-01-26	30	0.16
100	2019-01-26	30	6.5		100	2019-01-26	30	0.19
100	2019-01-26	5	8.45		100	2019-01-26	5	0.38
100	2019-01-26	5	8.69		100	2019-01-26	5	0.44
100	2019-05-29	15	6.94		100	2019-05-29	15	0.22
100	2019-05-29	15	6.69		100	2019-05-29	15	0.22
100	2019-05-29	30	6.78		100	2019-05-29	30	0.19
100	2019-05-29	30	6.51		100	2019-05-29	30	0.18
100	2019-05-29	5	9.16		100	2019-05-29	5	0.4
100	2019-05-29	5	9.72		100	2019-05-29	5	0.41
