# Supplementary material for: Determining the scale at which variation in a single gene changes population yields
Source: eLife. 2020 Feb 14;9:e53517. doi: 10.7554/eLife.53517 (PMC7136025; doi:10.7554/eLife.53517)
Supplement: Figure 3—figure supplement 4—source data 1. [file elife-53517-fig3-figsupp4-data1.xlsx]

## Sheet: Feuil1
Figure 3-figure supplement 4A							Figure 3-figure supplement 4B
% irMPK4 in Population	Depth (cm)	Field Row Location	Field Column Location	Days post planting	Soil Moisture (%)		Part of the Plot	Depth (cm)	Field Row Location	Field Column Location	Days post planting	Soil Moisture (%)
0	5	22	3	21	17.1462		1	5	14	1	21	13.7861
0	15	22	3	21	17.2323		1	15	14	1	21	17.4389
0	30	22	3	21	14.7192		1	30	14	1	21	14.3209
25	5	17	5	21	16.8036		1	5	1	3	21	18.2821
25	15	17	5	21	15.3954		1	15	1	3	21	15.1943
25	30	17	5	21	14.3787		1	30	1	3	21	13.4284
75	5	8	3	21	17.1755		1	5	29	4	21	19.0927
75	15	8	3	21	15.9096		1	15	29	4	21	15.8045
75	30	8	3	21	14.5744		1	30	29	4	21	15.5394
100	5	25	5	21	18.0349		1	5	6	5	21	18.3196
100	15	25	5	21	15.9502		1	15	6	5	21	16.9786
100	30	25	5	21	13.2988		1	30	6	5	21	14.1272
0	5	22	3	22	19.0814		1	5	22	3	21	17.1462
0	15	22	3	22	17.3669		1	15	22	3	21	17.2323
0	30	22	3	22	14.8716		1	30	22	3	21	14.7192
25	5	17	5	22	16.634		1	5	17	5	21	16.8036
25	15	17	5	22	14.7369		1	15	17	5	21	15.3954
25	30	17	5	22	13.4161		1	30	17	5	21	14.3787
75	5	8	3	22	20.043		1	5	8	3	21	17.1755
75	15	8	3	22	18.4318		1	15	8	3	21	15.9096
75	30	8	3	22	11.6589		1	30	8	3	21	14.5744
100	5	25	5	22	16.1653		1	5	25	5	21	18.0349
100	15	25	5	22	16.9395		1	15	25	5	21	15.9502
100	30	25	5	22	14.2817		1	30	25	5	21	13.2988
0	5	22	3	25	13.8197		1	5	14	1	22	14.1069
0	15	22	3	25	15.275		1	15	14	1	22	15.1458
0	30	22	3	25	12.7161		1	30	14	1	22	14.7806
25	5	17	5	25	14.6512		1	5	1	3	22	17.9066
25	15	17	5	25	13.762		1	15	1	3	22	14.0443
25	30	17	5	25	13.3667		1	30	1	3	22	13.052
75	5	8	3	25	16.6026		1	5	29	4	22	19.3483
75	15	8	3	25	13.9377		1	15	29	4	22	16.7211
75	30	8	3	25	12.9264		1	30	29	4	22	17.6038
100	5	25	5	25	14.1509		1	5	6	5	22	18.7793
100	15	25	5	25	15.3422		1	15	6	5	22	18.4283
100	30	25	5	25	11.4447		1	30	6	5	22	16.3355
0	5	22	3	28	8.98185		1	5	22	3	22	19.0814
0	15	22	3	28	14.4931		1	15	22	3	22	17.3669
0	30	22	3	28	15.3385		1	30	22	3	22	14.8716
25	5	17	5	28	12.8302		1	5	17	5	22	16.634
25	15	17	5	28	12.601		1	15	17	5	22	14.7369
25	30	17	5	28	14.9919		1	30	17	5	22	13.4161
75	5	8	3	28	11.9555		1	5	8	3	22	20.043
75	15	8	3	28	16.0251		1	15	8	3	22	18.4318
75	30	8	3	28	12.4834		1	30	8	3	22	11.6589
100	5	25	5	28	8.22476		1	5	25	5	22	16.1653
100	15	25	5	28	13.1771		1	15	25	5	22	16.9395
100	30	25	5	28	13.1301		1	30	25	5	22	14.2817
0	5	22	3	30	12.0998		1	5	14	1	25	14.5014
0	15	22	3	30	13.1097		1	15	14	1	25	13.8761
0	30	22	3	30	12.4496		1	30	14	1	25	13.2066
25	5	17	5	30	11.9824		1	5	1	3	25	13.2622
25	15	17	5	30	10.6084		1	15	1	3	25	11.7977
25	30	17	5	30	10.8072		1	30	1	3	25	18.7671
75	5	8	3	30	11.3463		1	5	29	4	25	13.7881
75	15	8	3	30	13.5987		1	15	29	4	25	13.5967
75	30	8	3	30	11.2008		1	30	29	4	25	16.3229
100	5	25	5	30	14.1658		1	5	6	5	25	14.769
100	15	25	5	30	14.9511		1	15	6	5	25	15.3649
100	30	25	5	30	12.5316		1	30	6	5	25	15.7041
							1	5	22	3	25	13.8197
							1	15	22	3	25	15.275
							1	30	22	3	25	12.7161
							1	5	17	5	25	14.6512
							1	15	17	5	25	13.762
							1	30	17	5	25	13.3667
							1	5	8	3	25	16.6026
							1	15	8	3	25	13.9377
							1	30	8	3	25	12.9264
							1	5	25	5	25	14.1509
							1	15	25	5	25	15.3422
							1	30	25	5	25	11.4447
							2	5	10	2	25	15.9954
							2	15	10	2	25	12.2682
							2	30	10	2	25	15.2389
							2	5	19	2	25	16.8334
							2	15	19	2	25	14.5519
							2	30	19	2	25	14.2948
							2	5	26	2	25	12.5149
							2	15	26	2	25	13.5071
							2	30	26	2	25	11.9088
							2	5	22	1	25	16.9926
							2	15	22	1	25	16.4498
							2	30	22	1	25	14.4791
							2	5	10	2	27	17.1337
							2	15	10	2	27	16.8363
							2	30	10	2	27	14.2513
							2	5	19	2	27	17.5114
							2	15	19	2	27	15.6876
							2	30	19	2	27	14.3992
							2	5	26	2	27	13.1367
							2	15	26	2	27	13.9729
							2	30	26	2	27	12.9996
							2	5	22	1	27	16.1261
							2	15	22	1	27	16.0595
							2	30	22	1	27	14.0657
							1	15	14	1	28	15.6684
							1	30	14	1	28	13.8716
							1	5	1	3	28	7.23097
							1	15	1	3	28	11.0367
							1	30	1	3	28	8.56819
							1	5	29	4	28	13.6148
							1	15	29	4	28	15.4451
							1	30	29	4	28	16.0424
							1	5	6	5	28	13.2135
							1	15	6	5	28	13.6269
							1	30	6	5	28	13.5818
							1	5	22	3	28	8.98185
							1	15	22	3	28	14.4931
							1	30	22	3	28	15.3385
							1	5	17	5	28	12.8302
							1	15	17	5	28	12.601
							1	30	17	5	28	14.9919
							1	5	8	3	28	11.9555
							1	15	8	3	28	16.0251
							1	30	8	3	28	12.4834
							1	5	25	5	28	8.22476
							1	15	25	5	28	13.1771
							1	30	25	5	28	13.1301
							2	5	10	2	28	18.1928
							2	15	10	2	28	17.5908
							2	30	10	2	28	14.1994
							2	5	19	2	28	17.4242
							2	15	19	2	28	17.1711
							2	30	19	2	28	13.7969
							2	5	26	2	28	11.6961
							2	15	26	2	28	12.5939
							2	30	26	2	28	11.935
							2	5	22	1	28	10.003
							2	15	22	1	28	12.2772
							2	30	22	1	28	14.0655
							1	5	14	1	30	12.2992
							1	15	14	1	30	14.6644
							1	30	14	1	30	13.9795
							1	5	1	3	30	10.2063
							1	15	1	3	30	10.123
							1	30	1	3	30	11.4225
							1	5	29	4	30	13.3095
							1	15	29	4	30	12.3421
							1	30	29	4	30	13.4607
							1	5	6	5	30	11.5199
							1	15	6	5	30	12.3472
							1	30	6	5	30	9.80753
							1	5	22	3	30	12.0998
							1	15	22	3	30	13.1097
							1	30	22	3	30	12.4496
							1	5	17	5	30	11.9824
							1	15	17	5	30	10.6084
							1	30	17	5	30	10.8072
							1	5	8	3	30	11.3463
							1	15	8	3	30	13.5987
							1	30	8	3	30	11.2008
							1	5	25	5	30	14.1658
							1	15	25	5	30	14.9511
							1	30	25	5	30	12.5316
