# Supplementary material for: Determining the scale at which variation in a single gene changes population yields
Source: eLife. 2020 Feb 14;9:e53517. doi: 10.7554/eLife.53517 (PMC7136025; doi:10.7554/eLife.53517)
Supplement: Figure 3—figure supplement 6—source data 1. [file elife-53517-fig3-figsupp6-data1.xlsx]

## Sheet: Feuil1
Figure 3-figure supplement 6A					Figure 3-figure supplement 6B					Figure 3-figure supplement 6C					Figure 3-figure supplement 6D							Figure 3-figure supplement 6E
% irMPK4 in Population	Replicate	Genotype	Diameter (cm)		% MPK4 in Population	Replicate	Genotype	Stalk Height (cm)		% MPK4 in Population	Replicate	Genotype	Shoot Dry Weight (mg)		% MPK4 in Population	Replicate	Genotype	Shoot Wet Weight (mg)	Shoot Dry Weight (mg)	Water Content (mg)		% MPK4 in Population	Replicate	Genotype	Total Fitness Correlates (#)
0	1	EV	10		0	1	EV	26		0	1	EV	256		0	1	EV	1428	256	1172		0	1	EV	4
0	1	EV	8		0	1	EV	27		0	1	EV	226		0	1	EV	1288	226	1062		0	1	EV	3
0	1	EV	9		0	1	EV	33		0	1	EV	498		0	1	EV	2061	498	1563		0	1	EV	5
0	1	EV	10.5		0	1	EV	43		0	1	EV	911		0	1	EV	3708	911	2797		0	1	EV	13
0	2	EV	7		0	2	EV	30		0	2+BR7	EV	206		0	2	EV	1165	206	959		0	2	EV	2
0	2	EV	9		0	2	EV	33		0	2	EV	345		0	2	EV	1468	345	1123		0	2	EV	5
0	2	EV	14		0	2	EV	51		0	2	EV	981		0	2	EV	4472	981	3491		0	2	EV	15
0	2	EV	7		0	2	EV	33		0	2	EV	279		0	2	EV	1397	279	1118		0	2	EV	3
0	3	EV	11.5		0	3	EV	41		0	3	EV	520		0	3	EV	2732	520	2212		0	3	EV	7
0	3	EV	14		0	3	EV	50		0	3	EV	852		0	3	EV	3884	852	3032		0	3	EV	13
0	3	EV	9		0	3	EV	35		0	3	EV	369		0	3	EV	2179	369	1810		0	3	EV	5
0	3	EV	12		0	3	EV	47		0	3	EV	715		0	3	EV	3558	715	2843		0	3	EV	14
0	6	EV	11		0	4	EV	29		0	4	EV	350		0	4	EV	1210	350	860		0	4	EV	9
0	6	EV	12		0	4	EV	19		0	4	EV	266		0	4	EV	855	266	589		0	4	EV	4
0	6	EV	13		0	4	EV	25		0	4	EV	271		0	4	EV	1025	271	754		0	4	EV	0
0	6	EV	10		0	6	EV	30		0	6	EV	379		0	6	EV	1516	379	1137		0	4	EV	6
0	7	EV	7		0	6	EV	33		0	6	EV	202		0	6	EV	1591	202	1389		0	6	EV	4
0	7	EV	11		0	6	EV	35		0	6	EV	532		0	6	EV	2083	532	1551		0	6	EV	9
0	7	EV	8		0	7	EV	20		0	7	EV	163		0	7	EV	845	163	682		0	6	EV	9
0	7	EV	2.5		0	7	EV	32		0	7	EV	444		0	7	EV	2314	444	1870		0	6	EV	0
0	8	EV	9		0	7	EV	10		0	7	EV	44		0	7	EV	499	44	455		0	7	EV	3
0	8	EV	8		0	8	EV	17		0	8	EV	88		0	8	EV	776	88	688		0	7	EV	12
0	8	EV	11		0	8	EV	18		0	8	EV	175		0	8	EV	979	175	804		0	7	EV	1
0	8	EV	7		0	8	EV	35		0	8	EV	617		0	8	EV	2489	617	1872		0	7	EV	0
0	9	EV	9		0	8	EV	18		0	8	EV	47		0	8	EV	534	47	487		0	8	EV	3
0	9	EV	13		0	9	EV	21		0	9	EV	142		0	9	EV	878	142	736		0	8	EV	2
0	9	EV	10		0	9	EV	36		0	9	EV	524		0	9	EV	2410	524	1886		0	8	EV	5
0	9	EV	10		0	9	EV	17		0	9	EV	159		0	9	EV	820	159	661		0	8	EV	2
0	10	EV	12		0	9	EV	27		0	9	EV	199		0	9	EV	1195	199	996		0	9	EV	3
0	10	EV	12		0	10	EV	35		0	10	EV	408		0	10	EV	1894	408	1486		0	9	EV	12
0	10	EV	12		0	10	EV	35		0	10	EV	577		0	10	EV	2932	577	2355		0	9	EV	3
0	10	EV	12		0	10	EV	33		0	10	EV	396		0	10	EV	1839	396	1443		0	9	EV	4
0	11	EV	13		0	10	EV	36		0	10	EV	452		0	10	EV	2598	452	2146		0	10	EV	7
0	11	EV	10		0	11	EV	42		0	11	EV	647		0	11	EV	2474	647	1827		0	10	EV	9
0	11	EV	11		0	11	EV	32		0	11	EV	319		0	11	EV	1443	319	1124		0	10	EV	8
0	11	EV	10		0	11	EV	37		0	11	EV	361		0	11	EV	1709	361	1348		0	10	EV	12
0	12	EV	13		0	11	EV	27		0	11	EV	267		0	11	EV	1274	267	1007		0	11	EV	11
0	12	EV	11		0	12	EV	37		0	12	EV	513		0	12	EV	2527	513	2014		0	11	EV	8
0	12	EV	14		0	12	EV	26		0	12	EV	498		0	12	EV	1580	498	1082		0	11	EV	9
0	12	EV	11		0	12	EV	29		0	12	EV	585		0	12	EV	1934	585	1349		0	11	EV	7
17	1	EV	9		0	12	EV	28		0	12	EV	394		0	12	EV	1274	394	880		0	12	EV	6
17	1	EV	9		17	1	MPK4	28		17	1	MPK4	339		17	1	MPK4	1452	339	1113		0	12	EV	6
17	2	EV	11		17	1	EV	35		17	1	EV	389		17	1	EV	2095	389	1706		0	12	EV	6
17	2	EV	10		17	1	EV	24		17	1	EV	541		17	1	EV	2271	541	1730		0	12	EV	10
17	3	EV	11		17	1	MPK4	36		17	2	MPK4	275		17	1	MPK4	3258	869	2389		17	1	EV	7
17	3	EV	10		17	2	MPK4	21		17	2	EV	758		17	2	MPK4	959	275	684		17	1	EV	6
17	4	EV	9		17	2	EV	38		17	2	EV	382		17	2	EV	2557	758	1799		17	2	EV	12
17	4	EV	7		17	2	EV	33		17	2	MPK4	492		17	2	EV	1529	382	1147		17	2	EV	7
17	6	EV	11		17	2	MPK4	26		17	3	MPK4	39		17	2	MPK4	1610	492	1118		17	3	EV	7
17	6	EV	10		17	3	MPK4	13		17	3	EV	375		17	3	MPK4	309	39	270		17	3	EV	6
17	7	EV	13		17	3	EV	38		17	3	EV	347		17	3	EV	1764	375	1389		17	4	EV	6
17	7	EV	8		17	3	EV	34		17	3	MPK4	48		17	3	EV	1537	347	1190		17	4	EV	4
17	8	EV	11		17	3	MPK4	12		17	4	MPK4	126		17	3	MPK4	411	48	363		17	6	EV	10
17	8	EV	10		17	4	MPK4	15		17	4	EV	323		17	4	MPK4	465	126	339		17	6	EV	3
17	9	EV	9		17	4	EV	20		17	4	EV	241		17	4	EV	1396	323	1073		17	7	EV	10
17	9	EV	9		17	4	EV	19		17	4	MPK4	302		17	4	EV	796	241	555		17	7	EV	4
17	10	EV	10		17	4	MPK4	19		17	6	MPK4	381		17	4	MPK4	904	302	602		17	8	EV	12
17	10	EV	11		17	6	MPK4	27		17	6	EV	376		17	6	MPK4	1475	381	1094		17	8	EV	6
17	11	EV	13		17	6	EV	30		17	6	EV	190		17	6	EV	1641	376	1265		17	9	EV	7
17	11	EV	8		17	6	EV	22		17	6	MPK4	29		17	6	EV	1126	190	936		17	9	EV	10
17	12	EV	14		17	6	MPK4	9		17	7	MPK4	89		17	6	MPK4	300	29	271		17	10	EV	10
17	12	EV	11		17	7	MPK4	18		17	7	EV	563		17	7	MPK4	570	89	481		17	10	EV	12
50	1	EV	13		17	7	EV	39		17	7	EV	215		17	7	EV	2490	563	1927		17	11	EV	8
50	1	EV	10		17	7	EV	22		17	7	MPK4	10		17	7	EV	1057	215	842		17	11	EV	4
50	2	EV	12		17	7	MPK4	10		17	8	MPK4	134		17	7	MPK4	227	10	217		17	12	EV	11
50	2	EV	10		17	8	MPK4	15		17	8	EV	601		17	8	MPK4	512	134	378		17	12	EV	10
50	3	EV	11		17	8	EV	32		17	8	EV	274		17	8	EV	2091	601	1490		50	1	EV	11
50	3	EV	11		17	8	EV	21		17	8	MPK4	426		17	8	EV	819	274	545		50	1	EV	8
50	4	EV	15		17	8	MPK4	18		17	9	MPK4	78		17	8	MPK4	1322	426	896		50	2	EV	6
50	4	EV	11		17	9	MPK4	15		17	9	EV	384		17	9	MPK4	423	78	345		50	2	EV	6
50	5	EV	11		17	9	EV	27		17	9	MPK4	5		17	9	EV	2089	1159	930		50	3	EV	10
50	5	EV	12		17	9	EV	28		17	10	MPK4	150		17	9	EV	1551	384	1167		50	3	EV	13
50	6	EV	11		17	9	MPK4	8		17	10	EV	531		17	9	MPK4	225	5	220		50	4	EV	14
50	6	EV	12		17	10	MPK4	13		17	10	EV	549		17	10	MPK4	479	150	329		50	4	EV	9
50	7	EV	10		17	10	EV	34		17	10	MPK4	283		17	10	EV	2308	531	1777		50	5	EV	7
50	7	EV	11		17	10	EV	34		17	11	MPK4	69		17	10	EV	2050	549	1501		50	5	EV	11
50	8	EV	13		17	10	MPK4	16		17	11	EV	491		17	10	MPK4	868	283	585		50	6	EV	13
50	8	EV	14		17	11	MPK4	16		17	11	EV	232		17	11	MPK4	439	69	370		50	6	EV	8
50	9	EV	7		17	11	EV	39		17	11	MPK4	102		17	11	EV	2378	491	1887		50	7	EV	11
50	9	EV	14		17	11	EV	29		17	12	MPK4	178		17	11	EV	1184	232	952		50	7	EV	11
50	11	EV	11		17	11	MPK4	20		17	12	EV	1009		17	11	MPK4	679	102	577		50	8	EV	7
50	11	EV	14		17	12	MPK4	19		17	12	EV	371		17	12	MPK4	1051	178	873		50	8	EV	10
50	12	EV	15		17	12	EV	38		17	12	MPK4	53		17	12	EV	2307	1009	1298		50	9	EV	3
50	12	EV	10		17	12	EV	35		50	1	MPK4	49		17	12	EV	2137	371	1766		50	9	EV	9
83	2	EV	12		17	12	MPK4	13		50	1	EV	588		17	12	MPK4	545	53	492		50	11	EV	14
83	2	EV	10.5		50	1	MPK4	10		50	1	EV	588		50	1	MPK4	326	49	277		50	11	EV	7
83	3	EV	11		50	1	EV	39		50	1	MPK4	154		50	1	EV	2423	588	1835		50	12	EV	15
83	3	EV	9		50	1	EV	34		50	2	MPK4	146		50	1	EV	2004	588	1416		50	12	EV	10
83	4	EV	8		50	1	MPK4	18		50	2	EV	573		50	1	MPK4	609	154	455		83	2	EV	6
83	4	EV	10		50	2	MPK4	17		50	2	EV	402		50	2	MPK4	616	146	470		83	2	EV	13
83	5	EV	9		50	2	EV	39		50	2	MPK4	83		50	2	EV	2264	573	1691		83	3	EV	10
83	5	EV	11		50	2	EV	34		50	3	MPK4	59		50	2	EV	1659	402	1257		83	3	EV	5
83	6	EV	10		50	2	MPK4	14		50	3	EV	531		50	2	MPK4	486	83	403		83	4	EV	6
83	6	EV	12		50	3	MPK4	12		50	3	EV	643		50	3	MPK4	382	59	323		83	4	EV	5
83	7	EV	10		50	3	EV	39		50	3	MPK4	113		50	3	EV	2330	531	1799		83	5	EV	8
83	7	EV	9		50	3	EV	42		50	4	MPK4	143		50	3	EV	2676	643	2033		83	5	EV	8
83	8	EV	11		50	3	MPK4	15		50	4	EV	1176		50	3	MPK4	479	113	366		83	7	EV	7
83	8	EV	7		50	4	MPK4	19		50	4	EV	558		50	4	MPK4	550	143	407		83	7	EV	4
83	9	EV	10		50	4	EV	55		50	4	MPK4	83		50	4	EV	4702	1176	3526		83	8	EV	12
83	9	EV	8		50	4	EV	41		50	5	MPK4	56		50	4	EV	2628	558	2070		83	8	EV	7
83	10	EV	10		50	4	MPK4	15		50	5	EV	496		50	4	MPK4	422	83	339		83	9	EV	7
83	10	EV	11		50	5	MPK4	15		50	5	EV	666		50	5	MPK4	405	56	349		83	9	EV	3
83	11	EV	9		50	5	EV	26		50	5	MPK4	347		50	5	EV	1816	496	1320		83	10	EV	5
83	11	EV	11		50	5	EV	36		50	6	MPK4	75		50	5	EV	2491	666	1825		83	10	EV	9
83	12	EV	10		50	5	MPK4	20		50	6	EV	609		50	5	MPK4	1059	347	712		83	11	EV	7
83	12	EV	16		50	6	MPK4	15		50	6	EV	517		50	6	MPK4	505	75	430		83	11	EV	8
17	1	MPK4	7		50	6	EV	40		50	6	MPK4	-4		50	6	EV	2595	609	1986		83	12	EV	11
17	1	MPK4	12		50	6	EV	37		50	7	MPK4	101		50	6	EV	2416	517	1899		17	1	MPK4	9
17	2	MPK4	7		50	6	MPK4	3		50	7	EV	451		50	6	MPK4	229	-4	233		17	1	MPK4	10
17	2	MPK4	8		50	7	MPK4	10		50	7	EV	591		50	7	MPK4	434	101	333		17	2	MPK4	7
17	3	MPK4	3.5		50	7	EV	33		50	7	MPK4	211		50	7	EV	1729	451	1278		17	2	MPK4	8
17	3	MPK4	6		50	7	EV	26		50	8	MPK4	23		50	7	EV	2160	591	1569		17	3	MPK4	1
17	4	MPK4	5		50	7	MPK4	17		50	8	EV	412		50	7	MPK4	770	211	559		17	3	MPK4	2
17	4	MPK4	8		50	8	MPK4	2		50	8	EV	608		50	8	MPK4	182	23	159		17	4	MPK4	3
17	6	MPK4	11		50	8	EV	31		50	8	MPK4	183		50	8	EV	1689	412	1277		17	4	MPK4	4
17	6	MPK4	6		50	8	EV	37		50	9	MPK4	136		50	8	EV	2242	608	1634		17	6	MPK4	9
17	7	MPK4	5		50	8	MPK4	15		50	9	EV	173		50	8	MPK4	767	183	584		17	6	MPK4	3
17	7	MPK4	5		50	9	MPK4	9		50	9	EV	703		50	9	MPK4	529	136	393		17	7	MPK4	4
17	8	MPK4	7		50	9	EV	21		50	9	MPK4	89		50	9	EV	591	173	418		17	7	MPK4	1
17	8	MPK4	10		50	9	MPK4	9		50	11	MPK4	137		50	9	EV	2096	703	1393		17	8	MPK4	4
17	9	MPK4	5		50	11	MPK4	20		50	11	EV	598		50	9	MPK4	341	89	252		17	8	MPK4	6
17	9	MPK4	3.5		50	11	EV	38		50	11	EV	580		50	11	MPK4	640	137	503		17	9	MPK4	2
17	10	MPK4	5		50	11	EV	31		50	11	MPK4	142		50	11	EV	2973	598	2375		17	9	MPK4	2
17	10	MPK4	8		50	11	MPK4	19		50	12	MPK4	202		50	11	EV	2828	580	2248		17	10	MPK4	3
17	11	MPK4	7		50	12	MPK4	18		50	12	EV	1012		50	11	MPK4	818	142	676		17	10	MPK4	4
17	11	MPK4	6.5		50	12	EV	42		50	12	EV	643		50	12	MPK4	698	202	496		17	11	MPK4	3
17	12	MPK4	8		50	12	EV	31		50	12	MPK4	179		50	12	EV	4094	1012	3082		17	11	MPK4	3
17	12	MPK4	6		50	12	MPK4	11		83	2	MPK4	219		50	12	EV	2327	643	1684		17	12	MPK4	6
50	1	MPK4	3.5		83	2	MPK4	22		83	2	EV	261		50	12	MPK4	481	179	302		17	12	MPK4	3
50	1	MPK4	8		83	2	EV	24		83	2	EV	803		83	2	MPK4	862	219	643		50	1	MPK4	2
50	2	MPK4	6		83	2	EV	45		83	2	MPK4	157		83	2	EV	1162	261	901		50	1	MPK4	6
50	2	MPK4	6		83	2	MPK4	12		83	3	MPK4	409		83	2	EV	3358	803	2555		50	2	MPK4	2
50	3	MPK4	6		83	3	MPK4	25		83	3	EV	533		83	2	MPK4	553	157	396		50	2	MPK4	1
50	3	MPK4	6		83	3	EV	35		83	3	EV	435		83	3	MPK4	1499	409	1090		50	3	MPK4	2
50	4	MPK4	4		83	3	EV	24		83	3	MPK4	274		83	3	EV	2076	533	1543		50	3	MPK4	3
50	4	MPK4	3.5		83	3	MPK4	31		83	4	MPK4	617		83	3	EV	1541	435	1106		50	4	MPK4	5
50	5	MPK4	4.5		83	4	MPK4	29		83	4	EV	281		83	3	MPK4	1039	274	765		50	4	MPK4	2
50	5	MPK4	7		83	4	EV	21		83	4	EV	536		83	4	MPK4	2429	617	1812		50	5	MPK4	4
50	6	MPK4	5		83	4	EV	31		83	4	MPK4	260		83	4	EV	1402	281	1121		50	5	MPK4	5
50	6	MPK4	6		83	4	MPK4	21		83	5	MPK4	193		83	4	EV	1912	536	1376		50	6	MPK4	3
50	7	MPK4	4.5		83	5	MPK4	16		83	5	EV	335		83	4	MPK4	1137	260	877		50	6	MPK4	1
50	7	MPK4	7		83	5	EV	27		83	5	EV	496		83	5	MPK4	765	193	572		50	7	MPK4	4
50	8	MPK4	4		83	5	EV	30		83	5	MPK4	193		83	5	EV	1829	335	1494		50	7	MPK4	5
50	8	MPK4	8		83	5	MPK4	12		83	6	MPK4	100		83	5	EV	2047	496	1551		50	8	MPK4	1
50	9	MPK4	6		83	6	MPK4	12		83	6	EV	450		83	5	MPK4	700	193	507		50	8	MPK4	5
50	9	MPK4	3.5		83	6	EV	30		83	6	EV	519		83	6	MPK4	456	100	356		50	9	MPK4	2
50	11	MPK4	6		83	6	EV	29		83	6	MPK4	288		83	6	EV	1781	450	1331		50	9	MPK4	2
50	11	MPK4	6		83	6	MPK4	18		83	7	MPK4	268		83	6	EV	2095	519	1576		50	11	MPK4	3
50	12	MPK4	6.5		83	7	MPK4	20		83	7	EV	281		83	6	MPK4	842	288	554		50	11	MPK4	3
50	12	MPK4	5		83	7	EV	19		83	7	EV	128		83	7	MPK4	1089	268	821		50	12	MPK4	4
83	2	MPK4	7		83	7	EV	15		83	7	MPK4	206		83	7	EV	1197	281	916		50	12	MPK4	2
83	2	MPK4	8.5		83	7	MPK4	19		83	8	MPK4	168		83	7	EV	755	128	627		83	2	MPK4	7
83	3	MPK4	11		83	8	MPK4	15		83	8	EV	664		83	7	MPK4	1075	206	869		83	2	MPK4	3
83	3	MPK4	8		83	8	EV	26		83	8	EV	254		83	8	MPK4	877	168	709		83	3	MPK4	8
83	4	MPK4	11		83	8	EV	23		83	8	MPK4	105		83	8	EV	2646	664	1982		83	3	MPK4	6
83	4	MPK4	5		83	8	MPK4	13		83	9	MPK4	233		83	8	EV	1082	254	828		83	4	MPK4	12
83	5	MPK4	6		83	9	MPK4	15		83	9	EV	524		83	8	MPK4	629	105	524		83	4	MPK4	5
83	5	MPK4	6		83	9	EV	27		83	9	EV	84		83	9	MPK4	749	233	516		83	5	MPK4	6
83	6	MPK4	5		83	9	EV	14		83	9	MPK4	142		83	9	EV	1683	524	1159		83	5	MPK4	4
83	6	MPK4	7		83	9	MPK4	13		83	10	MPK4	287		83	9	EV	536	84	452		83	7	MPK4	7
83	7	MPK4	8		83	10	MPK4	20		83	10	EV	525		83	9	MPK4	124	142	-18		83	7	MPK4	8
83	7	MPK4	8		83	10	EV	26		83	10	EV	640		83	10	MPK4	1125	287	838		83	8	MPK4	5
83	8	MPK4	7		83	10	EV	30		83	10	MPK4	408		83	10	EV	1879	525	1354		83	8	MPK4	3
83	8	MPK4	6		83	10	MPK4	18		83	11	MPK4	301		83	10	EV	2349	640	1709		83	9	MPK4	6
83	9	MPK4	8		83	11	MPK4	18		83	11	EV	283		83	10	MPK4	1231	408	823		83	9	MPK4	4
83	9	MPK4	6		83	11	EV	23		83	11	EV	364		83	11	MPK4	1198	301	897		83	10	MPK4	7
83	10	MPK4	7		83	11	EV	27		83	11	MPK4	327		83	11	EV	1149	283	866		83	10	MPK4	9
83	10	MPK4	9		83	11	MPK4	20		83	12	MPK4	222		83	11	EV	1635	364	1271		83	11	MPK4	7
83	11	MPK4	9		83	12	MPK4	18		83	12	EV	520		83	11	MPK4	1153	327	826		83	11	MPK4	8
83	11	MPK4	9		83	12	EV	30		83	12	MPK4	154		83	12	MPK4	792	222	570		83	12	MPK4	5
83	12	MPK4	9		83	12	MPK4	14		100	3	MPK4	544		83	12	EV	1936	520	1416		83	12	MPK4	2
83	12	MPK4	7		100	3	MPK4	31		100	3	MPK4	164		83	12	EV	976	1241	-265		100	3	MPK4	5
100	3	MPK4	11		100	3	MPK4	13		100	3	MPK4	183		83	12	MPK4	564	154	410		100	3	MPK4	5
100	3	MPK4	5		100	3	MPK4	16		100	3	MPK4	136		100	3	MPK4	2412	544	1868		100	3	MPK4	4
100	3	MPK4	6		100	3	MPK4	14		100	5	MPK4	218		100	3	MPK4	575	164	411		100	5	MPK4	6
100	3	MPK4	7		100	5	MPK4	12		100	5	MPK4	327		100	3	MPK4	671	183	488		100	5	MPK4	9
100	5	MPK4	7		100	5	MPK4	17		100	5	MPK4	305		100	3	MPK4	589	136	453		100	5	MPK4	8
100	5	MPK4	9		100	5	MPK4	14		100	5	MPK4	329		100	5	MPK4	702	218	484		100	5	MPK4	12
100	5	MPK4	6		100	5	MPK4	21		100	6	MPK4	101		100	5	MPK4	1093	327	766		100	6	MPK4	2
100	5	MPK4	11		100	6	MPK4	7		100	6	MPK4	230		100	5	MPK4	923	305	618		100	6	MPK4	6
100	6	MPK4	6		100	6	MPK4	16		100	6	MPK4	134		100	5	MPK4	1144	329	815		100	6	MPK4	4
100	6	MPK4	7		100	6	MPK4	12		100	6	MPK4	153		100	6	MPK4	399	101	298		100	6	MPK4	4
100	6	MPK4	7		100	6	MPK4	11		100	8	MPK4	247		100	6	MPK4	857	230	627		100	8	MPK4	6
100	6	MPK4	9		100	8	MPK4	15		100	8	MPK4	302		100	6	MPK4	763	134	629		100	8	MPK4	6
100	8	MPK4	8		100	8	MPK4	15		100	8	MPK4	165		100	6	MPK4	615	153	462		100	8	MPK4	2
100	8	MPK4	8		100	8	MPK4	11		100	8	MPK4	448		100	8	MPK4	851	247	604		100	8	MPK4	9
100	8	MPK4	6		100	8	MPK4	22		100	9	MPK4	128		100	8	MPK4	963	302	661		100	9	MPK4	3
100	8	MPK4	10		100	9	MPK4	10		100	9	MPK4	155		100	8	MPK4	564	165	399		100	9	MPK4	4
100	9	MPK4	7		100	9	MPK4	10		100	9	MPK4	292		100	8	MPK4	1440	448	992		100	9	MPK4	4
100	9	MPK4	7		100	9	MPK4	14		100	9	MPK4	431		100	9	MPK4	550	128	422		100	9	MPK4	7
100	9	MPK4	8		100	9	MPK4	20		100	10	MPK4	522		100	9	MPK4	566	155	411		100	10	MPK4	13
100	9	MPK4	9		100	10	MPK4	20		100	10	MPK4	320		100	9	MPK4	877	292	585		100	10	MPK4	7
100	10	MPK4	10		100	10	MPK4	20		100	10	MPK4	285		100	9	MPK4	1310	431	879		100	10	MPK4	8
100	10	MPK4	9		100	10	MPK4	21		100	10	MPK4	536		100	10	MPK4	1811	522	1289		100	10	MPK4	10
100	10	MPK4	9		100	10	MPK4	27		100	11	MPK4	355		100	10	MPK4	1153	320	833		100	11	MPK4	5
100	10	MPK4	8		100	11	MPK4	17		100	11	MPK4	163		100	10	MPK4	1070	285	785		100	11	MPK4	2
100	11	MPK4	7		100	11	MPK4	10		100	11	MPK4	223		100	10	MPK4	1570	536	1034		100	11	MPK4	2
100	11	MPK4	4		100	11	MPK4	12		100	11	MPK4	354		100	11	MPK4	1023	355	668		100	11	MPK4	5
100	11	MPK4	5		100	11	MPK4	16		100	12	MPK4	127		100	11	MPK4	521	163	358		100	12	MPK4	3
100	11	MPK4	7		100	12	MPK4	13		100	12	MPK4	276		100	11	MPK4	634	223	411		100	12	MPK4	3
100	12	MPK4	6		100	12	MPK4	12		100	12	MPK4	162		100	11	MPK4	978	354	624		100	12	MPK4	4
100	12	MPK4	6		100	12	MPK4	12		100	12	MPK4	423		100	12	MPK4	518	127	391		100	12	MPK4	6
100	12	MPK4	8		100	12	MPK4	19							100	12	MPK4	688	276	412
100	12	MPK4	8												100	12	MPK4	685	162	523
															100	12	MPK4	1104	423	681
