# Supplementary material for: Determining the scale at which variation in a single gene changes population yields
Source: eLife. 2020 Feb 14;9:e53517. doi: 10.7554/eLife.53517 (PMC7136025; doi:10.7554/eLife.53517)
Supplement: Figure 3—figure supplement 7—source data 1. [file elife-53517-fig3-figsupp7-data1.xlsx]

## Sheet: Feuil1
Figure 3-figure supplement 7A						Figure 3-figure supplement 7B					Figure 3-figure supplement 7C
Genotype	Replicate	AMF Interaction	Days post potting	Daily Pot Water Loss (g)		Genotype	Replicate	AMF Interaction	Wet Shoot Biomass (g)		Genotype	Replicate	AMF Interaction	Wet Root Biomass (g)
MPxCC	1	No	24	26.3		MPxCC	2	No	2.858		MPxCC	2	No	1.523
MPxCC	2	No	24	28.02		MPxCC	3	No	2.892		MPxCC	3	No	1.37
MPxCC	3	No	24	25.08		MPxCC	4	No	2.883		MPxCC	4	No	1.71
MPxCC	4	No	24	26.52		MPxCC	5	No	3.167		MPxCC	5	No	1.278
MPxCC	5	No	24	28		MPxCC	6	No	2.831		MPxCC	6	No	1.782
MPxCC	6	No	24	26.4		MPxCC	7	No	2.757		MPxCC	7	No	1.64
MPxCC	7	No	24	25.06		MPxCC	8	No	2.494		MPxCC	8	No	1.453
MPxCC	8	No	24	22.82		EVxCC	2	No	3.239		EVxCC	2	No	1.51
MPxCC	1	Yes	24	27.38		EVxCC	3	No	4.46		EVxCC	3	No	2.014
MPxCC	2	Yes	24	29.02		EVxCC	4	No	4.038		EVxCC	4	No	1.95
MPxCC	3	Yes	24	22.26		EVxCC	5	No	3.699		EVxCC	5	No	1.941
MPxCC	4	Yes	24	23.82		EVxCC	6	No	3.432		EVxCC	6	No	1.564
MPxCC	5	Yes	24	27.02		EVxCC	7	No	3.803		EVxCC	7	No	1.716
MPxCC	6	Yes	24	28.74		EVxCC	8	No	3.387		EVxCC	8	No	1.995
MPxCC	7	Yes	24	26		MPxEV	1	No	2.343		MPxEV	1	No	1.15
MPxCC	8	Yes	24	22.22		MPxEV	2	No	2.646		MPxEV	2	No	1.865
EVxCC	1	No	24	22.64		MPxEV	3	No	2.62		MPxEV	3	No	1.681
EVxCC	2	No	24	21		MPxEV	4	No	3.786		MPxEV	4	No	1.813
EVxCC	3	No	24	23.86		MPxEV	6	No	3.098		MPxEV	6	No	1.47
EVxCC	4	No	24	22.44		MPxEV	7	No	3.218		MPxEV	7	No	1.694
EVxCC	5	No	24	24.34		MPxEV	8	No	2.306		MPxEV	8	No	1.353
EVxCC	6	No	24	22.04		EVxEV	1	No	4.834		EVxEV	1	No	2.293
EVxCC	7	No	24	22.82		EVxEV	2	No	4		EVxEV	2	No	1.866
EVxCC	8	No	24	22.6		EVxEV	4	No	4.054		EVxEV	4	No	1.904
EVxCC	1	Yes	24	22.9		EVxEV	5	No	4.521		EVxEV	5	No	1.9
EVxCC	2	Yes	24	18.86		EVxEV	7	No	3.301		EVxEV	7	No	1.626
EVxCC	3	Yes	24	23.94							EVxEV	8	No	1.826
EVxCC	4	Yes	24	21.24
EVxCC	5	Yes	24	22.68
EVxCC	6	Yes	24	20.64
EVxCC	7	Yes	24	20.46
EVxCC	8	Yes	24	21.14
MPxEV	1	No	24	24.24
MPxEV	2	No	24	26.84
MPxEV	3	No	24	24.98
MPxEV	4	No	24	23.2
MPxEV	6	No	24	25.24
MPxEV	7	No	24	25.24
MPxEV	8	No	24	24.06
MPxEV	1	Yes	24	23.58
MPxEV	2	Yes	24	22.48
MPxEV	3	Yes	24	25.78
MPxEV	4	Yes	24	22.38
MPxEV	5	Yes	24	22.42
MPxEV	6	Yes	24	24.4
MPxEV	7	Yes	24	26.72
MPxEV	8	Yes	24	25.56
EVxEV	1	No	24	25.68
EVxEV	2	No	24	23.8
EVxEV	3	No	24	20.06
EVxEV	4	No	24	23.56
EVxEV	5	No	24	21.72
EVxEV	6	No	24	23.94
EVxEV	7	No	24	20
EVxEV	8	No	24	21.3
EVxEV	1	Yes	24	23.2
EVxEV	2	Yes	24	21.92
EVxEV	3	Yes	24	21.04
EVxEV	4	Yes	24	24.08
EVxEV	5	Yes	24	23.36
EVxEV	6	Yes	24	21.64
EVxEV	7	Yes	24	24.28
EVxEV	8	Yes	24	24.66
MPxCC	1	No	25	35.5
MPxCC	2	No	25	28.04
MPxCC	3	No	25	29.44
MPxCC	4	No	25	28.4
MPxCC	5	No	25	29.48
MPxCC	6	No	25	27.6
MPxCC	7	No	25	28.6
MPxCC	8	No	25	24.82
MPxCC	1	Yes	25	27.24
MPxCC	2	Yes	25	29.3
MPxCC	3	Yes	25	24.16
MPxCC	4	Yes	25	25
MPxCC	5	Yes	25	27.3
MPxCC	6	Yes	25	31.66
MPxCC	7	Yes	25	27.2
MPxCC	8	Yes	25	24.18
EVxCC	1	No	25	25.96
EVxCC	2	No	25	26.5
EVxCC	3	No	25	26.94
EVxCC	4	No	25	24.86
EVxCC	5	No	25	24.84
EVxCC	6	No	25	27
EVxCC	7	No	25	28.72
EVxCC	8	No	25	24.26
EVxCC	1	Yes	25	27.36
EVxCC	2	Yes	25	24.92
EVxCC	3	Yes	25	28.52
EVxCC	4	Yes	25	26.6
EVxCC	5	Yes	25	28.9
EVxCC	6	Yes	25	25.6
EVxCC	7	Yes	25	27.72
EVxCC	8	Yes	25	27.4
MPxEV	1	No	25	24.76
MPxEV	2	No	25	23.78
MPxEV	3	No	25	28.26
MPxEV	4	No	25	25.66
MPxEV	6	No	25	25.58
MPxEV	7	No	25	27.26
MPxEV	8	No	25	26.38
MPxEV	1	Yes	25	26.32
MPxEV	2	Yes	25	26.94
MPxEV	3	Yes	25	26.6
MPxEV	4	Yes	25	23
MPxEV	5	Yes	25	26.68
MPxEV	6	Yes	25	23.46
MPxEV	7	Yes	25	29.76
MPxEV	8	Yes	25	26.9
EVxEV	1	No	25	29.52
EVxEV	2	No	25	25.98
EVxEV	3	No	25	21.88
EVxEV	4	No	25	26.12
EVxEV	5	No	25	26.76
EVxEV	6	No	25	29.18
EVxEV	7	No	25	23.44
EVxEV	8	No	25	24.52
EVxEV	1	Yes	25	28.62
EVxEV	2	Yes	25	26.46
EVxEV	3	Yes	25	26.54
EVxEV	4	Yes	25	26.58
EVxEV	5	Yes	25	27.86
EVxEV	6	Yes	25	26
EVxEV	7	Yes	25	27.8
EVxEV	8	Yes	25	26.52
MPxCC	1	No	26	38
MPxCC	2	No	26	35.02
MPxCC	3	No	26	35.18
MPxCC	4	No	26	34.5
MPxCC	5	No	26	35.6
MPxCC	6	No	26	36
MPxCC	7	No	26	32.28
MPxCC	8	No	26	31.76
MPxCC	1	Yes	26	34.08
MPxCC	2	Yes	26	38.22
MPxCC	3	Yes	26	30.12
MPxCC	4	Yes	26	31.16
MPxCC	5	Yes	26	35.14
MPxCC	6	Yes	26	37.7
MPxCC	7	Yes	26	35.04
MPxCC	8	Yes	26	31.14
EVxCC	1	No	26	29.46
EVxCC	2	No	26	29.48
EVxCC	3	No	26	32.5
EVxCC	4	No	26	31.04
EVxCC	5	No	26	28.86
EVxCC	6	No	26	28.92
EVxCC	7	No	26	28.6
EVxCC	8	No	26	29.6
EVxCC	1	Yes	26	29.64
EVxCC	2	Yes	26	28.44
EVxCC	3	Yes	26	33.5
EVxCC	4	Yes	26	27.92
EVxCC	5	Yes	26	28.52
EVxCC	6	Yes	26	28.68
EVxCC	7	Yes	26	28.4
EVxCC	8	Yes	26	27.6
MPxEV	1	No	26	32.22
MPxEV	2	No	26	35.74
MPxEV	3	No	26	36.16
MPxEV	4	No	26	29.4
MPxEV	6	No	26	32.6
MPxEV	7	No	26	33.44
MPxEV	8	No	26	32.72
MPxEV	1	Yes	26	32.38
MPxEV	2	Yes	26	31.78
MPxEV	3	Yes	26	37.12
MPxEV	4	Yes	26	30.88
MPxEV	5	Yes	26	33.1
MPxEV	6	Yes	26	30.3
MPxEV	7	Yes	26	35
MPxEV	8	Yes	26	32.52
EVxEV	1	No	26	34.64
EVxEV	2	No	26	28.24
EVxEV	3	No	26	23.7
EVxEV	4	No	26	32.38
EVxEV	5	No	26	31.66
EVxEV	6	No	26	34.74
EVxEV	7	No	26	29.4
EVxEV	8	No	26	28.26
EVxEV	1	Yes	26	29.78
EVxEV	2	Yes	26	28.38
EVxEV	3	Yes	26	27.54
EVxEV	4	Yes	26	30.4
EVxEV	5	Yes	26	29.38
EVxEV	6	Yes	26	28.18
EVxEV	7	Yes	26	29.64
EVxEV	8	Yes	26	30.86
MPxCC	2	No	27	39.56
MPxCC	3	No	27	41.18
MPxCC	4	No	27	42.86
MPxCC	5	No	27	40.78
MPxCC	6	No	27	39.86
MPxCC	7	No	27	41.26
MPxCC	8	No	27	38.72
MPxCC	1	Yes	27	42.12
MPxCC	2	Yes	27	45.72
MPxCC	3	Yes	27	32.96
MPxCC	4	Yes	27	38.34
MPxCC	5	Yes	27	40.78
MPxCC	6	Yes	27	49.22
MPxCC	7	Yes	27	39.34
MPxCC	8	Yes	27	35.68
EVxCC	1	No	27	38.22
EVxCC	2	No	27	37.02
EVxCC	3	No	27	40.1
EVxCC	4	No	27	33.68
EVxCC	5	No	27	36.96
EVxCC	6	No	27	35.66
EVxCC	7	No	27	37.92
EVxCC	8	No	27	35.64
EVxCC	1	Yes	27	39.44
EVxCC	2	Yes	27	38.48
EVxCC	3	Yes	27	42.2
EVxCC	4	Yes	27	39.28
EVxCC	5	Yes	27	39.28
EVxCC	6	Yes	27	40.96
EVxCC	7	Yes	27	40.22
EVxCC	8	Yes	27	42.29
MPxEV	1	No	27	37.38
MPxEV	2	No	27	39.66
MPxEV	3	No	27	43.94
MPxEV	4	No	27	34.78
MPxEV	6	No	27	38.46
MPxEV	7	No	27	41.5
MPxEV	8	No	27	36.7
MPxEV	1	Yes	27	42.38
MPxEV	2	Yes	27	38.06
MPxEV	3	Yes	27	40.3
MPxEV	4	Yes	27	30.8
MPxEV	5	Yes	27	41.66
MPxEV	6	Yes	27	34.24
MPxEV	7	Yes	27	43.42
MPxEV	8	Yes	27	39.78
EVxEV	1	No	27	41.26
EVxEV	2	No	27	35.34
EVxEV	3	No	27	30.52
EVxEV	4	No	27	37.05
EVxEV	5	No	27	37.84
EVxEV	6	No	27	45.1
EVxEV	7	No	27	31.34
EVxEV	8	No	27	35.54
EVxEV	1	Yes	27	41.08
EVxEV	2	Yes	27	33.34
EVxEV	3	Yes	27	41.14
EVxEV	4	Yes	27	38.4
EVxEV	5	Yes	27	39.76
EVxEV	6	Yes	27	38.84
EVxEV	7	Yes	27	35.88
EVxEV	8	Yes	27	38.16
MPxCC	1	No	30	33.18
MPxCC	2	No	30	28.17
MPxCC	3	No	30	28.42
MPxCC	4	No	30	28.55
MPxCC	5	No	30	29.47
MPxCC	6	No	30	27.95
MPxCC	7	No	30	27.52
MPxCC	8	No	30	27.4
MPxCC	1	Yes	30	29.07
MPxCC	2	Yes	30	32.33
MPxCC	3	Yes	30	25.81
MPxCC	4	Yes	30	27.29
MPxCC	5	Yes	30	28.54
MPxCC	6	Yes	30	31.92
MPxCC	7	Yes	30	27.89
MPxCC	8	Yes	30	25.44
EVxCC	2	No	30	25.46
EVxCC	3	No	30	27.79
EVxCC	4	No	30	26.24
EVxCC	5	No	30	23.47
EVxCC	6	No	30	24.53
EVxCC	7	No	30	27.96
EVxCC	8	No	30	24.49
EVxCC	1	Yes	30	26.28
EVxCC	2	Yes	30	25.53
EVxCC	3	Yes	30	26.95
EVxCC	4	Yes	30	25.91
EVxCC	5	Yes	30	26.55
EVxCC	6	Yes	30	25.93
EVxCC	7	Yes	30	25.76
EVxCC	8	Yes	30	25.49
MPxEV	1	No	30	27.46
MPxEV	2	No	30	28.69
MPxEV	3	No	30	29.81
MPxEV	4	No	30	25.76
MPxEV	6	No	30	27.39
MPxEV	7	No	30	27.97
MPxEV	8	No	30	27.58
MPxEV	1	Yes	30	27.39
MPxEV	2	Yes	30	26.93
MPxEV	3	Yes	30	29.16
MPxEV	4	Yes	30	23.48
MPxEV	5	Yes	30	27.17
MPxEV	6	Yes	30	25.63
MPxEV	7	Yes	30	30.26
MPxEV	8	Yes	30	27.38
EVxEV	1	No	30	29.01
EVxEV	2	No	30	25.12
EVxEV	3	No	30	20.52
EVxEV	4	No	30	25.73
EVxEV	5	No	30	26.33
EVxEV	6	No	30	28.68
EVxEV	7	No	30	23.68
EVxEV	8	No	30	25.01
EVxEV	1	Yes	30	26.85
EVxEV	2	Yes	30	24.07
EVxEV	3	Yes	30	25.1
EVxEV	4	Yes	30	26.31
EVxEV	5	Yes	30	27.58
EVxEV	6	Yes	30	24.85
EVxEV	7	Yes	30	25.46
EVxEV	8	Yes	30	25.64
MPxCC	1	No	33	31.31
MPxCC	2	No	33	26.41
MPxCC	3	No	33	27.74
MPxCC	4	No	33	28.17
MPxCC	5	No	33	28.55
MPxCC	6	No	33	26.36
MPxCC	7	No	33	27.38
MPxCC	8	No	33	26.65
MPxCC	1	Yes	33	28.83
MPxCC	2	Yes	33	32.47
MPxCC	3	Yes	33	25.18
MPxCC	4	Yes	33	26.13
MPxCC	5	Yes	33	26.33
MPxCC	6	Yes	33	30.5
MPxCC	7	Yes	33	26.51
MPxCC	8	Yes	33	24.92
EVxCC	2	No	33	23.55
EVxCC	3	No	33	25.69
EVxCC	4	No	33	25.41
EVxCC	5	No	33	22.27
EVxCC	6	No	33	23
EVxCC	7	No	33	25.55
EVxCC	8	No	33	22.16
EVxCC	1	Yes	33	23.46
EVxCC	2	Yes	33	24.32
EVxCC	3	Yes	33	24.93
EVxCC	4	Yes	33	24.01
EVxCC	5	Yes	33	25.23
EVxCC	6	Yes	33	23.71
EVxCC	7	Yes	33	23.91
EVxCC	8	Yes	33	23.57
MPxEV	1	No	33	26.53
MPxEV	2	No	33	27.97
MPxEV	3	No	33	27.77
MPxEV	4	No	33	24.47
MPxEV	6	No	33	25.54
MPxEV	7	No	33	25.65
MPxEV	8	No	33	27.03
MPxEV	1	Yes	33	26.47
MPxEV	2	Yes	33	25.78
MPxEV	3	Yes	33	27.44
MPxEV	4	Yes	33	24.34
MPxEV	5	Yes	33	26.79
MPxEV	6	Yes	33	26.25
MPxEV	7	Yes	33	29.41
MPxEV	8	Yes	33	26.21
EVxEV	1	No	33	27.2
EVxEV	2	No	33	24.55
EVxEV	3	No	33	18.57
EVxEV	4	No	33	24.33
EVxEV	5	No	33	24.53
EVxEV	6	No	33	26.91
EVxEV	7	No	33	22.09
EVxEV	8	No	33	22.44
EVxEV	1	Yes	33	24.9
EVxEV	2	Yes	33	23.58
EVxEV	3	Yes	33	23.99
EVxEV	4	Yes	33	24.65
EVxEV	5	Yes	33	25.47
EVxEV	6	Yes	33	23.67
EVxEV	7	Yes	33	22.86
EVxEV	8	Yes	33	23.63
