# Supplementary material for: Determining the scale at which variation in a single gene changes population yields
Source: eLife. 2020 Feb 14;9:e53517. doi: 10.7554/eLife.53517 (PMC7136025; doi:10.7554/eLife.53517)
Supplement: Figure 3—figure supplement 8—source data 1. [file elife-53517-fig3-figsupp8-data1.xlsx]

## Sheet: 11-11-2019-10_48_34_zim_probe_d
Figure 3-figure supplement 8
Genotype	irMPK4	irMPK4	EV	irMPK4	irMPK4	irMPK4	EV	EV	EV	irMPK4
% irMPK4 in Population	100	100	17	50	100	83	50	83	0	17
Yara-ZIM Probe ID	4891	5524	4767	4943	5237	4668	4736	5077	5236	4734
Transmitter-Slot	1406-1	1406-2	1407-1	1407-2	1448-1	1449-3	1450-1	1451-2	1451-3	1452-3
Timestamp in Local Time
2014-12-03 23:00:02								0.15	-2.99
2014-12-03 23:00:04							-4.42
2014-12-03 23:00:17					-2.94
2014-12-03 23:00:22	1.1	-2.03
2014-12-03 23:00:45						2.44
2014-12-03 23:00:54										-1.46
2014-12-03 23:01:05			2.96	3.08
2014-12-03 23:01:32								0.15	-2.99
2014-12-03 23:01:34							-4.4
2014-12-03 23:01:47					-2.92
2014-12-03 23:01:52	0.88	-2.03
2014-12-03 23:02:15						2.64
2014-12-03 23:02:24										-1.5
2014-12-03 23:02:35			2.95	3.18
2014-12-03 23:03:02								0.15	-3.08
2014-12-03 23:03:04							-4.4
2014-12-03 23:03:17					-2.94
2014-12-03 23:03:22	1.1	-1.93
2014-12-03 23:03:45						2.46
2014-12-03 23:03:54										-1.74
2014-12-03 23:04:05			2.95	3.08
2014-12-03 23:04:32								0.25	-2.89
2014-12-03 23:04:34							-4.5
2014-12-03 23:04:47					-2.92
2014-12-03 23:04:52	1.2	-1.93
2014-12-03 23:05:15						2.46
2014-12-03 23:05:24										-1.5
2014-12-03 23:05:35			2.95	2.97
2014-12-03 23:06:02								0.25	-2.99
2014-12-03 23:06:04							-4.5
2014-12-03 23:06:17					-2.74
2014-12-03 23:06:22	1	-2.03
2014-12-03 23:06:45						2.46
2014-12-03 23:06:54										-1.6
2014-12-03 23:07:05			3.04	3.29
2014-12-03 23:07:32								0.15	-2.98
2014-12-03 23:07:34							-4.47
2014-12-03 23:07:47					-2.92
2014-12-03 23:07:52	0.98	-2.03
2014-12-03 23:08:15						2.46
2014-12-03 23:08:24										-1.5
2014-12-03 23:08:35			2.85	2.97
2014-12-03 23:09:02								0.25	-2.99
2014-12-03 23:09:04							-4.4
2014-12-03 23:09:17					-2.92
2014-12-03 23:09:22	1.1	-2.03
2014-12-03 23:09:45						2.64
2014-12-03 23:09:54										-1.6
2014-12-03 23:10:05			3.04	3.08
2014-12-03 23:10:32								0.25	-2.89
2014-12-03 23:10:34							-4.4
2014-12-03 23:10:47					-2.84
2014-12-03 23:10:52	0.98	-1.95
2014-12-03 23:11:15						2.54
2014-12-03 23:11:24										-1.7
2014-12-03 23:11:35			2.94	3.08
2014-12-03 23:12:02								0.15	-2.99
2014-12-03 23:12:04							-4.4
2014-12-03 23:12:17					-2.74
2014-12-03 23:12:22	0.88	-1.93
2014-12-03 23:12:45						2.54
2014-12-03 23:12:54										-1.7
2014-12-03 23:13:05			2.85	3.08
2014-12-03 23:13:32								0.35	-2.99
2014-12-03 23:13:34							-4.6
2014-12-03 23:13:47					-2.84
2014-12-03 23:13:52	1	-2.03
2014-12-03 23:14:15						2.54
2014-12-03 23:14:24										-1.56
2014-12-03 23:14:35			2.94	3.19
2014-12-03 23:15:02								0.25	-2.99
2014-12-03 23:15:04							-4.5
2014-12-03 23:15:17					-2.94
2014-12-03 23:15:22	1.02	-1.95
2014-12-03 23:15:45						2.44
2014-12-03 23:15:54										-1.46
2014-12-03 23:16:05			2.94	3.08
2014-12-03 23:16:32								0.25	-2.9
2014-12-03 23:16:34							-4.5
2014-12-03 23:16:47					-2.74
2014-12-03 23:16:52	1	-2.05
2014-12-03 23:17:15						2.51
2014-12-03 23:17:24										-1.56
2014-12-03 23:17:35			2.94	2.98
2014-12-03 23:18:02								0.35	-2.9
2014-12-03 23:18:04							-4.52
2014-12-03 23:18:17					-2.85
2014-12-03 23:18:22	1.22	-1.95
2014-12-03 23:18:45						2.54
2014-12-03 23:18:54										-1.7
2014-12-03 23:19:05			3.04	3.09
2014-12-03 23:19:32								0.35	-2.9
2014-12-03 23:19:34							-4.42
2014-12-03 23:19:47					-2.75
2014-12-03 23:19:52	1.12	-1.95
2014-12-03 23:20:15						2.44
2014-12-03 23:20:24										-1.7
2014-12-03 23:20:35			3.13	3.09
2014-12-03 23:21:02								0.35	-3
2014-12-03 23:21:04							-4.5
2014-12-03 23:21:17					-2.84
2014-12-03 23:21:22	1.12	-1.85
2014-12-03 23:21:45						2.61
2014-12-03 23:21:54										-1.56
2014-12-03 23:22:05			3.04	3.19
2014-12-03 23:22:32								0.25	-3
2014-12-03 23:22:33							-4.42
2014-12-03 23:22:47					-2.84
2014-12-03 23:22:52	1	-2.03
2014-12-03 23:23:15						2.44
2014-12-03 23:23:24										-1.56
2014-12-03 23:23:35			3.03	3.09
2014-12-03 23:24:02								0.35	-2.9
2014-12-03 23:24:03							-4.42
2014-12-03 23:24:17					-2.94
2014-12-03 23:24:22	0.9	-1.95
2014-12-03 23:24:45						2.51
2014-12-03 23:24:54										-1.56
2014-12-03 23:25:05			2.85	3.09
2014-12-03 23:25:32								0.05	-2.99
2014-12-03 23:25:33							-4.42
2014-12-03 23:25:47					-3.12
2014-12-03 23:25:52	1.02	-1.95
2014-12-03 23:26:15						2.51
2014-12-03 23:26:24										-1.46
2014-12-03 23:26:35			3.04	3.09
2014-12-03 23:27:02								0.25	-2.9
2014-12-03 23:27:03							-4.5
2014-12-03 23:27:17					-2.85
2014-12-03 23:27:22	1.12	-1.95
2014-12-03 23:27:45						2.61
2014-12-03 23:27:54										-1.6
2014-12-03 23:28:05			3.13	3.2
2014-12-03 23:28:32								0.25	-2.9
2014-12-03 23:28:33							-4.52
2014-12-03 23:28:48					-2.94
2014-12-03 23:28:52	1.02	-1.95
2014-12-03 23:29:15						2.51
2014-12-03 23:29:24										-1.56
2014-12-03 23:29:35			2.94	3.1
2014-12-03 23:30:02								0.25	-3
2014-12-03 23:30:03							-4.6
2014-12-03 23:30:18					-2.94
2014-12-03 23:30:22	1.02	-1.78
2014-12-03 23:30:45						2.51
2014-12-03 23:30:54										-1.8
2014-12-03 23:31:05			2.94	3.3
2014-12-03 23:31:32								0.45	-2.9
2014-12-03 23:31:33							-4.45
2014-12-03 23:31:48					-2.85
2014-12-03 23:31:52	1.12	-1.88
2014-12-03 23:32:15						2.51
2014-12-03 23:32:24										-1.46
2014-12-03 23:32:35			3.03	3.09
2014-12-03 23:33:02								0.25	-2.9
2014-12-03 23:33:03							-4.42
2014-12-03 23:33:18					-2.85
2014-12-03 23:33:22	1.02	-1.95
2014-12-03 23:33:45						2.51
2014-12-03 23:33:54										-1.46
2014-12-03 23:34:05			3.03	3.2
2014-12-03 23:34:32								0.25	-3
2014-12-03 23:34:33							-4.42
2014-12-03 23:34:48					-2.84
2014-12-03 23:34:52	1.14	-2.05
2014-12-03 23:35:15						2.51
2014-12-03 23:35:24										-1.31
2014-12-03 23:35:35			2.94	3.2
2014-12-03 23:36:02								0.25	-3.19
2014-12-03 23:36:03							-4.42
2014-12-03 23:36:18					-2.95
2014-12-03 23:36:22	1.02	-1.95
2014-12-03 23:36:45						2.61
2014-12-03 23:36:54										-1.56
2014-12-03 23:37:05			2.94	2.99
2014-12-03 23:37:32								0.25	-2.99
2014-12-03 23:37:33							-4.45
2014-12-03 23:37:48					-2.85
2014-12-03 23:37:52	1.14	-1.78
2014-12-03 23:38:15						2.51
2014-12-03 23:38:24										-1.66
2014-12-03 23:38:35			3.03	2.99
2014-12-03 23:39:02								0.25	-3
2014-12-03 23:39:03							-4.55
2014-12-03 23:39:18					-2.85
2014-12-03 23:39:22	1.02	-2.05
2014-12-03 23:39:45						2.69
2014-12-03 23:39:54										-1.46
2014-12-03 23:40:05			2.93	3.2
2014-12-03 23:40:32								0.25	-2.9
2014-12-03 23:40:33							-4.35
2014-12-03 23:40:48					-2.94
2014-12-03 23:40:52	1.02	-1.88
2014-12-03 23:41:15						2.44
2014-12-03 23:41:24										-1.56
2014-12-03 23:41:35			2.84	3.1
2014-12-03 23:42:02								0.25	-2.9
2014-12-03 23:42:03							-4.52
2014-12-03 23:42:18					-2.84
2014-12-03 23:42:22	1.02	-1.88
2014-12-03 23:42:45						2.41
2014-12-03 23:42:54										-1.66
2014-12-03 23:43:05			3.03	2.99
2014-12-03 23:43:32								0.25	-3
2014-12-03 23:43:33							-4.35
2014-12-03 23:43:48					-2.85
2014-12-03 23:43:52	1.02	-1.88
2014-12-03 23:44:15						2.51
2014-12-03 23:44:24										-1.66
2014-12-03 23:44:35			2.93	3.1
2014-12-03 23:45:02								0.25	-3
2014-12-03 23:45:03							-4.45
2014-12-03 23:45:18					-2.95
2014-12-03 23:45:22	1.02	-1.98
2014-12-03 23:45:45						2.51
2014-12-03 23:45:54										-1.7
2014-12-03 23:46:05			3.03	3.2
2014-12-03 23:46:32								0.25	-2.9
2014-12-03 23:46:33							-4.6
2014-12-03 23:46:48					-2.85
2014-12-03 23:46:52	0.92	-1.95
2014-12-03 23:47:15						2.41
2014-12-03 23:47:24										-1.46
2014-12-03 23:47:35			2.83	3.1
2014-12-03 23:48:02								0.15	-2.9
2014-12-03 23:48:03							-4.42
2014-12-03 23:48:18					-2.95
2014-12-03 23:48:22	0.9	-2.05
2014-12-03 23:48:45						2.51
2014-12-03 23:48:54										-1.56
2014-12-03 23:49:05			2.93	3.2
2014-12-03 23:49:32								0.25	-3
2014-12-03 23:49:33							-4.52
2014-12-03 23:49:48					-3.04
2014-12-03 23:49:52	1.12	-1.85
2014-12-03 23:50:15						2.31
2014-12-03 23:50:24										-1.56
2014-12-03 23:50:35			2.83	3.1
2014-12-03 23:51:02								0.25	-3
2014-12-03 23:51:03							-4.42
2014-12-03 23:51:18					-3.04
2014-12-03 23:51:22	1.02	-2.05
2014-12-03 23:51:45						2.51
2014-12-03 23:51:54										-1.66
2014-12-03 23:52:05			3.02	2.99
2014-12-03 23:52:32							-4.52	0.35	-2.81
2014-12-03 23:52:48					-2.94
2014-12-03 23:52:52	1.02	-2.13
2014-12-03 23:53:15						2.61
2014-12-03 23:53:24										-1.31
2014-12-03 23:53:35			2.93	3.1
2014-12-03 23:54:02							-4.52	0.25	-2.91
2014-12-03 23:54:18					-2.76
2014-12-03 23:54:22	1.02	-1.88
2014-12-03 23:54:45						2.44
2014-12-03 23:54:54										-1.56
2014-12-03 23:55:05			2.93	3.1
2014-12-03 23:55:32							-4.6	0.25	-3.01
2014-12-03 23:55:48					-3.04
2014-12-03 23:55:52	1.02	-1.98
2014-12-03 23:56:15						2.41
2014-12-03 23:56:24										-1.66
2014-12-03 23:56:35			2.93	3.2
2014-12-03 23:57:02							-4.52	0.25	-3.09
2014-12-03 23:57:18					-2.95
2014-12-03 23:57:22	1.04	-1.98
2014-12-03 23:57:45						2.51
2014-12-03 23:57:54										-1.41
2014-12-03 23:58:05			2.93	3.1
2014-12-03 23:58:32							-4.42	0.25	-2.9
2014-12-03 23:58:48					-2.95
2014-12-03 23:58:52	0.92	-1.98
2014-12-03 23:59:15						2.44
2014-12-03 23:59:24										-1.51
2014-12-03 23:59:35			2.93	3.1
2014-12-04 00:00:02							-4.52
2014-12-04 00:00:03								0.25	-2.81
2014-12-04 00:00:18					-3.04
2014-12-04 00:00:22	1.04	-1.98
2014-12-04 00:00:45						2.51
2014-12-04 00:00:54										-1.8
2014-12-04 00:01:05			2.93	3
2014-12-04 00:01:32							-4.55
2014-12-04 00:01:33								0.35	-3.01
2014-12-04 00:01:48					-2.95
2014-12-04 00:01:52	0.92	-1.88
2014-12-04 00:02:15						2.41
2014-12-04 00:02:24										-1.56
2014-12-04 00:02:35			3.02	3.21
2014-12-04 00:03:02							-4.52
2014-12-04 00:03:03								0.15	-3
2014-12-04 00:03:18					-2.95
2014-12-04 00:03:22	1.02	-1.98
2014-12-04 00:03:45						2.51
2014-12-04 00:03:54										-1.66
2014-12-04 00:04:05			2.83	2.9
2014-12-04 00:04:32							-4.52
2014-12-04 00:04:33								0.15	-3.1
2014-12-04 00:04:48					-2.95
2014-12-04 00:04:52	1.02	-1.95
2014-12-04 00:05:15						2.41
2014-12-04 00:05:24										-1.66
2014-12-04 00:05:35			2.92	3.11
2014-12-04 00:06:02							-4.55
2014-12-04 00:06:03								0.25	-3
2014-12-04 00:06:18					-2.95
2014-12-04 00:06:22	0.9	-1.95
2014-12-04 00:06:45						2.41
2014-12-04 00:06:54										-1.41
2014-12-04 00:07:05			2.83	3
2014-12-04 00:07:32							-4.35
2014-12-04 00:07:33								0.25	-3.1
2014-12-04 00:07:48					-2.85
2014-12-04 00:07:52	0.92	-1.95
2014-12-04 00:08:15						2.41
2014-12-04 00:08:24										-1.41
2014-12-04 00:08:35			2.93	3.2
2014-12-04 00:09:02							-4.52
2014-12-04 00:09:03								0.15	-2.91
2014-12-04 00:09:18					-2.85
2014-12-04 00:09:22	0.92	-2.13
2014-12-04 00:09:45						2.41
2014-12-04 00:09:54										-1.66
2014-12-04 00:10:05			2.92	3.1
2014-12-04 00:10:32							-4.45
2014-12-04 00:10:33								0.25	-2.91
2014-12-04 00:10:48					-2.86
2014-12-04 00:10:52	0.92	-2.05
2014-12-04 00:11:15						2.41
2014-12-04 00:11:24										-1.41
2014-12-04 00:11:35			2.83	3
2014-12-04 00:12:02							-4.55
2014-12-04 00:12:03								0.25	-2.91
2014-12-04 00:12:18					-2.86
2014-12-04 00:12:22	1.02	-1.95
2014-12-04 00:12:45						2.41
2014-12-04 00:12:54										-1.41
2014-12-04 00:13:05			2.83	3
2014-12-04 00:13:32							-4.55
2014-12-04 00:13:33								0.25	-2.91
2014-12-04 00:13:48					-2.85
2014-12-04 00:13:52	1.14	-1.95
2014-12-04 00:14:15						2.41
2014-12-04 00:14:24										-1.41
2014-12-04 00:14:35			2.73	3
2014-12-04 00:15:02							-4.52
2014-12-04 00:15:03								0.15	-3.1
2014-12-04 00:15:18					-2.85
2014-12-04 00:15:22	1.02	-2.05
2014-12-04 00:15:45						2.51
2014-12-04 00:15:54										-1.66
2014-12-04 00:16:05			2.83	3
2014-12-04 00:16:32							-4.62
2014-12-04 00:16:33								0.15	-3
2014-12-04 00:16:48					-2.85
2014-12-04 00:16:52	0.8	-1.95
2014-12-04 00:17:15						2.41
2014-12-04 00:17:24										-1.51
2014-12-04 00:17:35			2.64	3
2014-12-04 00:18:02							-4.62
2014-12-04 00:18:03								0.15	-3
2014-12-04 00:18:18					-2.95
2014-12-04 00:18:22	0.92	-2.05
2014-12-04 00:18:45						2.41
2014-12-04 00:18:54										-1.66
2014-12-04 00:19:05			2.83	3.1
2014-12-04 00:19:31							-4.52
2014-12-04 00:19:33								0.15	-2.91
2014-12-04 00:19:48					-2.85
2014-12-04 00:19:52	0.92	-1.98
2014-12-04 00:20:15						2.31
2014-12-04 00:20:24										-1.51
2014-12-04 00:20:35			2.93	2.89
2014-12-04 00:21:01							-4.62
2014-12-04 00:21:03								0.15	-3
2014-12-04 00:21:18					-2.85
2014-12-04 00:21:22	0.92	-1.98
2014-12-04 00:21:46						2.41
2014-12-04 00:21:54										-1.56
2014-12-04 00:22:05			2.83	3
2014-12-04 00:22:31							-4.45
2014-12-04 00:22:33								0.05	-3.1
2014-12-04 00:22:48					-2.85
2014-12-04 00:22:52	0.92	-1.95
2014-12-04 00:23:16						2.41
2014-12-04 00:23:24										-1.66
2014-12-04 00:23:35			2.83	3
2014-12-04 00:24:01							-4.62
2014-12-04 00:24:03								0.15	-3.1
2014-12-04 00:24:18					-2.95
2014-12-04 00:24:22	0.92	-1.88
2014-12-04 00:24:46						2.31
2014-12-04 00:24:54										-1.76
2014-12-04 00:25:05			2.82	2.91
2014-12-04 00:25:31							-4.55
2014-12-04 00:25:33								0.25	-3.01
2014-12-04 00:25:48					-2.86
2014-12-04 00:25:52	0.94	-1.98
2014-12-04 00:26:16						2.41
2014-12-04 00:26:24										-1.51
2014-12-04 00:26:35			2.82	2.9
2014-12-04 00:27:01							-4.62
2014-12-04 00:27:03								0.15	-3.2
2014-12-04 00:27:18					-3.05
2014-12-04 00:27:22	0.94	-1.88
2014-12-04 00:27:46						2.31
2014-12-04 00:27:54										-1.56
2014-12-04 00:28:05			2.82	2.9
2014-12-04 00:28:31							-4.62
2014-12-04 00:28:33								0.15	-3
2014-12-04 00:28:48					-2.95
2014-12-04 00:28:52	0.82	-1.88
2014-12-04 00:29:16						2.31
2014-12-04 00:29:24										-1.66
2014-12-04 00:29:35			2.73	2.9
2014-12-04 00:30:01							-4.55
2014-12-04 00:30:03								0.25	-3.1
2014-12-04 00:30:18					-2.95
2014-12-04 00:30:22	0.82	-1.95
2014-12-04 00:30:46						2.31
2014-12-04 00:30:54										-1.51
2014-12-04 00:31:05			2.73	2.79
2014-12-04 00:31:31							-4.55
2014-12-04 00:31:33								0.15	-3.1
2014-12-04 00:31:48					-2.95
2014-12-04 00:31:52	0.92	-2.05
2014-12-04 00:32:16						2.39
2014-12-04 00:32:24										-1.51
2014-12-04 00:32:35			2.83	3
2014-12-04 00:33:01							-4.55
2014-12-04 00:33:03								0.35	-2.9
2014-12-04 00:33:18					-2.95
2014-12-04 00:33:22	0.82	-1.98
2014-12-04 00:33:46						2.41
2014-12-04 00:33:54										-1.66
2014-12-04 00:34:05			2.82	2.9
2014-12-04 00:34:31							-4.62
2014-12-04 00:34:33								0.15	-2.91
2014-12-04 00:34:48					-2.95
2014-12-04 00:34:52	0.9	-1.95
2014-12-04 00:35:16						2.41
2014-12-04 00:35:24										-1.66
2014-12-04 00:35:35			2.92	2.9
2014-12-04 00:36:01							-4.55
2014-12-04 00:36:03								0.25	-3.01
2014-12-04 00:36:18					-2.95
2014-12-04 00:36:22	0.92	-2.05
2014-12-04 00:36:46						2.51
2014-12-04 00:36:54										-1.66
2014-12-04 00:37:05			2.82	2.9
2014-12-04 00:37:31							-4.55
2014-12-04 00:37:33								0.05	-3.2
2014-12-04 00:37:48					-3.05
2014-12-04 00:37:52	0.92	-1.98
2014-12-04 00:38:16						2.41
2014-12-04 00:38:24										-1.51
2014-12-04 00:38:35			3.01	3.11
2014-12-04 00:39:01							-4.55
2014-12-04 00:39:03								0.25	-3
2014-12-04 00:39:18					-2.85
2014-12-04 00:39:22	1.02	-2.08
2014-12-04 00:39:46						2.39
2014-12-04 00:39:54										-1.61
2014-12-04 00:40:05			2.82	2.8
2014-12-04 00:40:31							-4.55
2014-12-04 00:40:33								0.25	-3.1
2014-12-04 00:40:48					-2.95
2014-12-04 00:40:52	0.82	-1.98
2014-12-04 00:41:16						2.21
2014-12-04 00:41:24										-1.66
2014-12-04 00:41:35			2.92	3
2014-12-04 00:42:01							-4.55
2014-12-04 00:42:03								0.05	-3.01
2014-12-04 00:42:18					-2.95
2014-12-04 00:42:22	1.04	-2.15
2014-12-04 00:42:46						2.41
2014-12-04 00:42:54										-1.51
2014-12-04 00:43:05			2.73	2.69
2014-12-04 00:43:30							-4.62
2014-12-04 00:43:33								0.25	-3.1
2014-12-04 00:43:48					-3.05
2014-12-04 00:43:52	0.82	-1.95
2014-12-04 00:44:16						2.31
2014-12-04 00:44:24										-1.51
2014-12-04 00:44:35			2.82	2.9
2014-12-04 00:45:00							-4.62
2014-12-04 00:45:03								0.05	-3.1
2014-12-04 00:45:18					-2.85
2014-12-04 00:45:22	1.04	-2.15
2014-12-04 00:45:46						2.41
2014-12-04 00:45:54										-1.41
2014-12-04 00:46:05			2.82	2.69
2014-12-04 00:46:30							-4.62
2014-12-04 00:46:33								0.25	-3.1
2014-12-04 00:46:48					-3.05
2014-12-04 00:46:52	0.8	-2.05
2014-12-04 00:47:16						2.31
2014-12-04 00:47:24										-1.76
2014-12-04 00:47:35			2.82	2.9
2014-12-04 00:48:00							-4.55
2014-12-04 00:48:03								0.15	-3.1
2014-12-04 00:48:18					-2.76
2014-12-04 00:48:22	0.92	-1.95
2014-12-04 00:48:46						2.31
2014-12-04 00:48:54										-1.66
2014-12-04 00:49:05			2.82	3.01
2014-12-04 00:49:30							-4.72
2014-12-04 00:49:33								0.15	-3.1
2014-12-04 00:49:48					-3.05
2014-12-04 00:49:53	0.92	-1.98
2014-12-04 00:50:16						2.39
2014-12-04 00:50:24										-1.61
2014-12-04 00:50:35			2.82	2.8
2014-12-04 00:51:00							-4.65
2014-12-04 00:51:03								0.25	-3.1
2014-12-04 00:51:18					-2.95
2014-12-04 00:51:23	0.82	-2.15
2014-12-04 00:51:46						2.49
2014-12-04 00:51:54										-1.51
2014-12-04 00:52:05			2.72	2.8
2014-12-04 00:52:30							-4.62
2014-12-04 00:52:33								0.15	-3.01
2014-12-04 00:52:48					-2.95
2014-12-04 00:52:53	0.82	-2.15
2014-12-04 00:53:16						2.39
2014-12-04 00:53:24										-1.51
2014-12-04 00:53:35			2.82	2.8
2014-12-04 00:54:00							-4.55
2014-12-04 00:54:03								0.15	-3.01
2014-12-04 00:54:18					-2.95
2014-12-04 00:54:23	0.82	-1.98
2014-12-04 00:54:46						2.29
2014-12-04 00:54:54										-1.76
2014-12-04 00:55:05			2.73	2.8
2014-12-04 00:55:30							-4.62
2014-12-04 00:55:33								0.15	-3.01
2014-12-04 00:55:48					-2.95
2014-12-04 00:55:53	0.82	-1.98
2014-12-04 00:56:16						2.41
2014-12-04 00:56:24										-1.51
2014-12-04 00:56:35			2.63	2.7
2014-12-04 00:57:00							-4.62
2014-12-04 00:57:03								0.15	-3.1
2014-12-04 00:57:18					-2.95
2014-12-04 00:57:23	0.84	-1.98
2014-12-04 00:57:46						2.31
2014-12-04 00:57:54										-1.61
2014-12-04 00:58:05			2.92	2.8
2014-12-04 00:58:30							-4.72
2014-12-04 00:58:33								0.25	-3.01
2014-12-04 00:58:48					-3.05
2014-12-04 00:58:53	0.94	-2.15
2014-12-04 00:59:16						2.39
2014-12-04 00:59:24										-1.51
2014-12-04 00:59:35			2.63	2.9
2014-12-04 01:00:00							-4.62
2014-12-04 01:00:03								0.25	-3.01
2014-12-04 01:00:18					-2.86
2014-12-04 01:00:23	0.94	-2.08
2014-12-04 01:00:46						2.31
2014-12-04 01:00:54										-1.51
2014-12-04 01:01:05			2.72	2.91
2014-12-04 01:01:30							-4.55
2014-12-04 01:01:33								0.05	-3.2
2014-12-04 01:01:48					-2.95
2014-12-04 01:01:53	0.94	-2.15
2014-12-04 01:02:16						2.21
2014-12-04 01:02:24										-1.71
2014-12-04 01:02:35			2.72	2.81
2014-12-04 01:03:00							-4.65
2014-12-04 01:03:03								0.15	-3.11
2014-12-04 01:03:18					-2.95
2014-12-04 01:03:23	0.84	-2.08
2014-12-04 01:03:46						2.31
2014-12-04 01:03:54										-1.61
2014-12-04 01:04:05			2.72	2.7
2014-12-04 01:04:30							-4.65
2014-12-04 01:04:33								0.25	-2.92
2014-12-04 01:04:48					-2.96
2014-12-04 01:04:53	0.84	-2.15
2014-12-04 01:05:16						2.39
2014-12-04 01:05:24										-1.61
2014-12-04 01:05:35			2.72	2.92
2014-12-04 01:06:00							-4.65
2014-12-04 01:06:03								0.25	-3.21
2014-12-04 01:06:18					-2.95
2014-12-04 01:06:23	0.84	-2.01
2014-12-04 01:06:46						2.39
2014-12-04 01:06:54										-1.47
2014-12-04 01:07:05			2.82	2.81
2014-12-04 01:07:30							-4.65
2014-12-04 01:07:33								0.15	-3.1
2014-12-04 01:07:48					-3.05
2014-12-04 01:07:53	0.84	-1.88
2014-12-04 01:08:16						2.39
2014-12-04 01:08:24										-1.71
2014-12-04 01:08:35			2.72	2.81
2014-12-04 01:09:00							-4.65
2014-12-04 01:09:03								0.25	-3.2
2014-12-04 01:09:18					-3.05
2014-12-04 01:09:23	0.84	-2.05
2014-12-04 01:09:46						2.31
2014-12-04 01:09:54										-1.61
2014-12-04 01:10:05			2.82	2.8
2014-12-04 01:10:29							-4.65
2014-12-04 01:10:33								0.15	-3.2
2014-12-04 01:10:48					-2.95
2014-12-04 01:10:53	1.04	-2.05
2014-12-04 01:11:16						2.31
2014-12-04 01:11:24										-1.76
2014-12-04 01:11:35			2.73	2.7
2014-12-04 01:11:59							-4.65
2014-12-04 01:12:03								0.15	-3.01
2014-12-04 01:12:18					-2.85
2014-12-04 01:12:23	0.94	-1.98
2014-12-04 01:12:46						2.31
2014-12-04 01:12:54										-1.76
2014-12-04 01:13:05			2.63	2.7
2014-12-04 01:13:29							-4.55
2014-12-04 01:13:33								0.15	-3.2
2014-12-04 01:13:48					-2.86
2014-12-04 01:13:53	0.82	-1.98
2014-12-04 01:14:16						2.21
2014-12-04 01:14:24										-1.66
2014-12-04 01:14:35			2.83	2.8
2014-12-04 01:14:59							-4.72
2014-12-04 01:15:03								0.15	-2.91
2014-12-04 01:15:18					-2.95
2014-12-04 01:15:23	0.72	-1.98
2014-12-04 01:15:46						2.31
2014-12-04 01:15:54										-1.61
2014-12-04 01:16:05			2.82	2.6
2014-12-04 01:16:29							-4.65
2014-12-04 01:16:33								0.15	-3.1
2014-12-04 01:16:48					-3.05
2014-12-04 01:16:53	0.74	-2.08
2014-12-04 01:17:16						2.11
2014-12-04 01:17:24										-1.51
2014-12-04 01:17:35			2.82	2.81
2014-12-04 01:17:59							-4.75
2014-12-04 01:18:03								0.15	-3.01
2014-12-04 01:18:18					-3.05
2014-12-04 01:18:23	0.84	-2.08
2014-12-04 01:18:46						2.21
2014-12-04 01:18:54										-1.71
2014-12-04 01:19:05			2.72	2.7
2014-12-04 01:19:29							-4.72
2014-12-04 01:19:33								0.15	-3.1
2014-12-04 01:19:48					-3.05
2014-12-04 01:19:53	0.84	-1.98
2014-12-04 01:20:16						2.31
2014-12-04 01:20:24										-1.51
2014-12-04 01:20:35			2.72	2.7
2014-12-04 01:20:59							-4.55
2014-12-04 01:21:03								0.25	-3.1
2014-12-04 01:21:18					-3.05
2014-12-04 01:21:23	0.94	-1.98
2014-12-04 01:21:46						2.31
2014-12-04 01:21:54										-1.61
2014-12-04 01:22:05			2.72	2.81
2014-12-04 01:22:29							-4.55
2014-12-04 01:22:33								0.15	-3.11
2014-12-04 01:22:48					-3.05
2014-12-04 01:22:53	0.72	-2.15
2014-12-04 01:23:16						2.29
2014-12-04 01:23:24										-1.61
2014-12-04 01:23:35			2.72	2.7
2014-12-04 01:23:59							-4.72
2014-12-04 01:24:03								0.15	-3.11
2014-12-04 01:24:18					-2.86
2014-12-04 01:24:23	0.72	-2.08
2014-12-04 01:24:46						2.29
2014-12-04 01:24:54										-1.66
2014-12-04 01:25:05			2.63	2.71
2014-12-04 01:25:29							-4.65
2014-12-04 01:25:33								0.15	-3.1
2014-12-04 01:25:48					-3.05
2014-12-04 01:25:53	0.84	-2.15
2014-12-04 01:26:16						2.21
2014-12-04 01:26:25										-1.61
2014-12-04 01:26:35			2.72	2.81
2014-12-04 01:26:59							-4.65
2014-12-04 01:27:03								0.15	-3.11
2014-12-04 01:27:18					-3.05
2014-12-04 01:27:23	0.94	-2.05
2014-12-04 01:27:46						2.31
2014-12-04 01:27:55										-1.76
2014-12-04 01:28:05			2.62	2.61
2014-12-04 01:28:29							-4.72
2014-12-04 01:28:33								0.15	-3.11
2014-12-04 01:28:48					-3.05
2014-12-04 01:28:53	0.82	-2.08
2014-12-04 01:29:16						2.19
2014-12-04 01:29:24										-1.61
2014-12-04 01:29:35			2.72	2.71
2014-12-04 01:29:59							-4.75
2014-12-04 01:30:03								0.05	-3.11
2014-12-04 01:30:18					-3.15
2014-12-04 01:30:23	0.84	-2.08
2014-12-04 01:30:46						2.31
2014-12-04 01:30:54										-1.61
2014-12-04 01:31:05			2.72	2.71
2014-12-04 01:31:29							-4.65
2014-12-04 01:31:33								0.15	-3.11
2014-12-04 01:31:48					-3.14
2014-12-04 01:31:53	0.72	-2.05
2014-12-04 01:32:16						2.19
2014-12-04 01:32:24										-1.71
2014-12-04 01:32:35			2.62	2.6
2014-12-04 01:32:59							-4.75
2014-12-04 01:33:03								0.15	-3.01
2014-12-04 01:33:18					-3.15
2014-12-04 01:33:23	0.62	-2.08
2014-12-04 01:33:46						2.11
2014-12-04 01:33:54										-1.37
2014-12-04 01:34:05			2.62	2.7
2014-12-04 01:34:28							-4.55
2014-12-04 01:34:33								0.15	-3.2
2014-12-04 01:34:48					-3.15
2014-12-04 01:34:53	0.82	-2.08
2014-12-04 01:35:16						2.21
2014-12-04 01:35:25										-1.61
2014-12-04 01:35:35			2.62	2.6
2014-12-04 01:35:58							-4.65
2014-12-04 01:36:03								0.15	-3.11
2014-12-04 01:36:18					-2.96
2014-12-04 01:36:23	0.84	-2.08
2014-12-04 01:36:46						2.29
2014-12-04 01:36:55										-1.76
2014-12-04 01:37:05			2.81	2.6
2014-12-04 01:37:28							-4.72
2014-12-04 01:37:33								0.25	-3.11
2014-12-04 01:37:48					-2.96
2014-12-04 01:37:53	0.86	-2.05
2014-12-04 01:38:16						2.21
2014-12-04 01:38:25										-1.61
2014-12-04 01:38:35			2.52	2.6
2014-12-04 01:38:58							-4.72
2014-12-04 01:39:03								0.15	-3.2
2014-12-04 01:39:18					-3.05
2014-12-04 01:39:23	0.74	-1.98
2014-12-04 01:39:46						2.29
2014-12-04 01:39:55										-1.61
2014-12-04 01:40:05			2.53	2.61
2014-12-04 01:40:28							-4.72
2014-12-04 01:40:33								0.15	-3.11
2014-12-04 01:40:48					-3.05
2014-12-04 01:40:53	0.74	-2.08
2014-12-04 01:41:16						2.21
2014-12-04 01:41:25										-1.67
2014-12-04 01:41:35			2.72	2.5
2014-12-04 01:41:58							-4.75
2014-12-04 01:42:03								0.15	-3.01
2014-12-04 01:42:18					-3.14
2014-12-04 01:42:23	0.72	-2.08
2014-12-04 01:42:46						2.11
2014-12-04 01:42:55										-1.61
2014-12-04 01:43:05			2.72	2.71
2014-12-04 01:43:28							-4.8
2014-12-04 01:43:33								0.15	-3.11
2014-12-04 01:43:48					-2.96
2014-12-04 01:43:53	0.72	-2.15
2014-12-04 01:44:16						2.29
2014-12-04 01:44:25										-1.61
2014-12-04 01:44:35			2.81	2.5
2014-12-04 01:44:58							-4.82
2014-12-04 01:45:03								0.15	-3.21
2014-12-04 01:45:18					-3.05
2014-12-04 01:45:23	0.84	-2.08
2014-12-04 01:45:46						2.39
2014-12-04 01:45:55										-1.47
2014-12-04 01:46:05			2.72	2.81
2014-12-04 01:46:28							-4.82
2014-12-04 01:46:33								0.05	-3.11
2014-12-04 01:46:48					-3.15
2014-12-04 01:46:53	0.72	-2.15
2014-12-04 01:47:16						2.19
2014-12-04 01:47:25										-1.86
2014-12-04 01:47:35			2.62	2.7
2014-12-04 01:47:58							-4.65
2014-12-04 01:48:03								0.05	-3.11
2014-12-04 01:48:18					-2.96
2014-12-04 01:48:23	0.74	-2.15
2014-12-04 01:48:46						2.29
2014-12-04 01:48:55										-1.76
2014-12-04 01:49:05			2.62	2.6
2014-12-04 01:49:28							-4.65
2014-12-04 01:49:33								0.25	-3.11
2014-12-04 01:49:48					-2.96
2014-12-04 01:49:53	0.84	-2.08
2014-12-04 01:50:16						2.39
2014-12-04 01:50:25										-1.71
2014-12-04 01:50:35			2.62	2.71
2014-12-04 01:50:58							-4.82
2014-12-04 01:51:03								0.05	-3.01
2014-12-04 01:51:18					-3.15
2014-12-04 01:51:23	0.84	-2.08
2014-12-04 01:51:46						2.39
2014-12-04 01:51:55										-1.76
2014-12-04 01:52:05			2.62	2.61
2014-12-04 01:52:28							-4.75
2014-12-04 01:52:33								0.05	-3.11
2014-12-04 01:52:48					-3.05
2014-12-04 01:52:53	0.84	-2.08
2014-12-04 01:53:16						2.19
2014-12-04 01:53:25										-1.61
2014-12-04 01:53:35			2.62	2.71
2014-12-04 01:53:58							-4.65
2014-12-04 01:54:03								0.05	-3.21
2014-12-04 01:54:18					-3.15
2014-12-04 01:54:23	0.96	-2.08
2014-12-04 01:54:46						2.29
2014-12-04 01:54:55										-1.61
2014-12-04 01:55:05			2.62	2.61
2014-12-04 01:55:28							-4.75
2014-12-04 01:55:33								0.05	-3.21
2014-12-04 01:55:48					-3.15
2014-12-04 01:55:53	0.74	-2.18
2014-12-04 01:56:16						2.21
2014-12-04 01:56:25										-1.61
2014-12-04 01:56:35			2.72	2.6
2014-12-04 01:56:58							-4.65
2014-12-04 01:57:03								0.15	-3.2
2014-12-04 01:57:18					-3.06
2014-12-04 01:57:23	0.72	-2.15
2014-12-04 01:57:46						2.29
2014-12-04 01:57:55										-1.71
2014-12-04 01:58:05			2.62	2.61
2014-12-04 01:58:28							-4.75
2014-12-04 01:58:33								0.15	-3.11
2014-12-04 01:58:48					-3.15
2014-12-04 01:58:53	0.62	-2.15
2014-12-04 01:59:16						2.19
2014-12-04 01:59:25										-1.81
2014-12-04 01:59:35			2.62	2.5
2014-12-04 01:59:58							-4.67
2014-12-04 02:00:03								0.05	-3.11
2014-12-04 02:00:18					-2.96
2014-12-04 02:00:23	0.72	-2.05
2014-12-04 02:00:46						2.29
2014-12-04 02:00:55										-1.71
2014-12-04 02:01:05			2.43	2.6
2014-12-04 02:01:27							-4.75
2014-12-04 02:01:33								0.05	-3.12
2014-12-04 02:01:48					-3.15
2014-12-04 02:01:53	0.62	-2.08
2014-12-04 02:02:16						2.09
2014-12-04 02:02:25										-1.71
2014-12-04 02:02:35			2.44	2.61
2014-12-04 02:02:57							-4.65
2014-12-04 02:03:03								0.05	-3.11
2014-12-04 02:03:18					-3.05
2014-12-04 02:03:23	0.62	-2.15
2014-12-04 02:03:46						2.19
2014-12-04 02:03:55										-1.86
2014-12-04 02:04:05			2.62	2.51
2014-12-04 02:04:27							-4.75
2014-12-04 02:04:33								0.15	-3.11
2014-12-04 02:04:48					-3.15
2014-12-04 02:04:53	0.72	-2.15
2014-12-04 02:05:16						2.11
2014-12-04 02:05:25										-1.71
2014-12-04 02:05:35			2.53	2.5
2014-12-04 02:05:57							-4.75
2014-12-04 02:06:03								0.15	-3.11
2014-12-04 02:06:18					-3.05
2014-12-04 02:06:23	0.74	-2.15
2014-12-04 02:06:46						2.19
2014-12-04 02:06:55										-1.61
2014-12-04 02:07:05			2.62	2.51
2014-12-04 02:07:27							-4.85
2014-12-04 02:07:33								0.05	-3.11
2014-12-04 02:07:48					-3.05
2014-12-04 02:07:53	0.74	-2.18
2014-12-04 02:08:16						2.19
2014-12-04 02:08:25										-1.71
2014-12-04 02:08:35			2.62	2.5
2014-12-04 02:08:57							-4.65
2014-12-04 02:09:03								0.05	-3.21
2014-12-04 02:09:18					-3.05
2014-12-04 02:09:23	0.74	-2.15
2014-12-04 02:09:46						2.11
2014-12-04 02:09:55										-1.71
2014-12-04 02:10:05			2.62	2.4
2014-12-04 02:10:27							-4.85
2014-12-04 02:10:33								0.15	-3.3
2014-12-04 02:10:48					-3.06
2014-12-04 02:10:53	0.74	-2.08
2014-12-04 02:11:16						2.09
2014-12-04 02:11:25										-1.86
2014-12-04 02:11:35			2.62	2.51
2014-12-04 02:11:57							-4.75
2014-12-04 02:12:03								0.05	-3.11
2014-12-04 02:12:18					-3.15
2014-12-04 02:12:23	0.84	-2.08
2014-12-04 02:12:46						2.11
2014-12-04 02:12:55										-1.71
2014-12-04 02:13:05			2.62	2.61
2014-12-04 02:13:27							-4.82
2014-12-04 02:13:33								0.05	-3.21
2014-12-04 02:13:48					-3.25
2014-12-04 02:13:53	0.74	-2.08
2014-12-04 02:14:16						2.09
2014-12-04 02:14:25										-1.71
2014-12-04 02:14:35			2.52	2.61
2014-12-04 02:14:57							-4.75
2014-12-04 02:15:03								0.05	-3.2
2014-12-04 02:15:18					-2.96
2014-12-04 02:15:23	0.74	-2.08
2014-12-04 02:15:46						2.19
2014-12-04 02:15:55										-1.71
2014-12-04 02:16:05			2.62	2.5
2014-12-04 02:16:27							-4.75
2014-12-04 02:16:33								0.05	-3.2
2014-12-04 02:16:48					-3.05
2014-12-04 02:16:53	0.64	-2.18
2014-12-04 02:17:16						2.19
2014-12-04 02:17:25										-1.57
2014-12-04 02:17:35			2.53	2.5
2014-12-04 02:17:57							-4.85
2014-12-04 02:18:03								0.05	-3.11
2014-12-04 02:18:18					-3.06
2014-12-04 02:18:23	0.62	-2.08
2014-12-04 02:18:46						2.29
2014-12-04 02:18:55										-1.71
2014-12-04 02:19:05			2.62	2.61
2014-12-04 02:19:27							-4.72
2014-12-04 02:19:33								0.05	-3.21
2014-12-04 02:19:48					-3.06
2014-12-04 02:19:53	0.84	-2.08
2014-12-04 02:20:16						2.19
2014-12-04 02:20:25										-1.71
2014-12-04 02:20:35			2.43	2.51
2014-12-04 02:20:57							-4.67
2014-12-04 02:21:03								0.05	-3.2
2014-12-04 02:21:18					-3.15
2014-12-04 02:21:23	0.74	-2.11
2014-12-04 02:21:46						2.19
2014-12-04 02:21:55										-1.57
2014-12-04 02:22:05			2.62	2.71
2014-12-04 02:22:27							-4.82
2014-12-04 02:22:33								0.05	-3.21
2014-12-04 02:22:48					-3.06
2014-12-04 02:22:53	0.74	-2.18
2014-12-04 02:23:16						2.19
2014-12-04 02:23:25										-1.71
2014-12-04 02:23:35			2.61	2.4
2014-12-04 02:23:57							-4.85
2014-12-04 02:24:03								0.05	-3.21
2014-12-04 02:24:18					-3.15
2014-12-04 02:24:23	0.84	-2.08
2014-12-04 02:24:46						2.19
2014-12-04 02:24:55										-1.76
2014-12-04 02:25:05			2.42	2.4
2014-12-04 02:25:26							-4.65
2014-12-04 02:25:33								0.15	-3.2
2014-12-04 02:25:48					-3.05
2014-12-04 02:25:53	0.74	-2.18
2014-12-04 02:26:16						2.19
2014-12-04 02:26:25										-1.57
2014-12-04 02:26:35			2.61	2.4
2014-12-04 02:26:56							-4.92
2014-12-04 02:27:03								0.05	-3.11
2014-12-04 02:27:18					-3.06
2014-12-04 02:27:23	0.64	-2.11
2014-12-04 02:27:46						2.09
2014-12-04 02:27:55										-1.81
2014-12-04 02:28:05			2.52	2.41
2014-12-04 02:28:26							-4.85
2014-12-04 02:28:33								0.05	-3.21
2014-12-04 02:28:48					-3.06
2014-12-04 02:28:53	0.74	-2.18
2014-12-04 02:29:16						2.19
2014-12-04 02:29:25										-1.61
2014-12-04 02:29:35			2.42	2.5
2014-12-04 02:29:56							-4.75
2014-12-04 02:30:03								0.05	-3.11
2014-12-04 02:30:18					-2.96
2014-12-04 02:30:23	0.64	-2.18
2014-12-04 02:30:46						2.19
2014-12-04 02:30:55										-1.61
2014-12-04 02:31:05			2.62	2.61
2014-12-04 02:31:26							-4.65
2014-12-04 02:31:33								0.05	-3.31
2014-12-04 02:31:48					-3.15
2014-12-04 02:31:53	0.74	-2.18
2014-12-04 02:32:16						2.11
2014-12-04 02:32:25										-1.71
2014-12-04 02:32:35			2.52	2.41
2014-12-04 02:32:56							-4.85
2014-12-04 02:33:03								0.05	-3.12
2014-12-04 02:33:18					-3.25
2014-12-04 02:33:23	0.74	-2.18
2014-12-04 02:33:46						2.19
2014-12-04 02:33:55										-1.71
2014-12-04 02:34:05			2.52	2.4
2014-12-04 02:34:26							-4.67
2014-12-04 02:34:33								0.05	-3.12
2014-12-04 02:34:48					-3.15
2014-12-04 02:34:53	0.86	-2.18
2014-12-04 02:35:16						2.21
2014-12-04 02:35:25										-1.67
2014-12-04 02:35:35			2.52	2.61
2014-12-04 02:35:56							-4.75
2014-12-04 02:36:03								0.15	-3.11
2014-12-04 02:36:18					-3.06
2014-12-04 02:36:23	0.74	-2.28
2014-12-04 02:36:46						2.19
2014-12-04 02:36:55										-1.61
2014-12-04 02:37:05			2.52	2.41
2014-12-04 02:37:26							-4.75
2014-12-04 02:37:33								0.05	-3.21
2014-12-04 02:37:48					-3.06
2014-12-04 02:37:53	0.52	-2.18
2014-12-04 02:38:16						2.11
2014-12-04 02:38:25										-1.71
2014-12-04 02:38:35			2.52	2.41
2014-12-04 02:38:56							-4.85
2014-12-04 02:39:03								0.05	-3.3
2014-12-04 02:39:18					-3.05
2014-12-04 02:39:23	0.64	-2.08
2014-12-04 02:39:46						2.19
2014-12-04 02:39:55										-1.67
2014-12-04 02:40:05			2.62	2.4
2014-12-04 02:40:26							-4.77
2014-12-04 02:40:33								0.05	-3.21
2014-12-04 02:40:48					-3.06
2014-12-04 02:40:53	0.64	-2.18
2014-12-04 02:41:16						2.19
2014-12-04 02:41:25										-1.71
2014-12-04 02:41:36			2.52	2.51
2014-12-04 02:41:56							-4.75
2014-12-04 02:42:03								0.05	-3.21
2014-12-04 02:42:18					-3.05
2014-12-04 02:42:23	0.64	-2.28
2014-12-04 02:42:46						2.09
2014-12-04 02:42:55										-1.71
2014-12-04 02:43:06			2.52	2.4
2014-12-04 02:43:26							-4.75
2014-12-04 02:43:33								0.05	-3.21
2014-12-04 02:43:48					-3.06
2014-12-04 02:43:53	0.62	-2.18
2014-12-04 02:44:16						2.09
2014-12-04 02:44:25										-1.81
2014-12-04 02:44:36			2.52	2.41
2014-12-04 02:44:56							-4.85
2014-12-04 02:45:03								0.05	-3.3
2014-12-04 02:45:18					-3.15
2014-12-04 02:45:23	0.76	-2.08
2014-12-04 02:45:46						2.09
2014-12-04 02:45:55										-1.71
2014-12-04 02:46:06			2.43	2.4
2014-12-04 02:46:26							-4.85
2014-12-04 02:46:33								0.05	-3.21
2014-12-04 02:46:48					-3.15
2014-12-04 02:46:53	0.64	-2.15
2014-12-04 02:47:16						2.09
2014-12-04 02:47:25										-1.71
2014-12-04 02:47:36			2.42	2.51
2014-12-04 02:47:56							-4.85
2014-12-04 02:48:03								0.05	-3.21
2014-12-04 02:48:18					-3.06
2014-12-04 02:48:23	0.86	-2.25
2014-12-04 02:48:46						2.19
2014-12-04 02:48:55										-1.61
2014-12-04 02:49:06			2.42	2.51
2014-12-04 02:49:25							-4.85
2014-12-04 02:49:33								0.15	-3.21
2014-12-04 02:49:48					-3.06
2014-12-04 02:49:53	0.74	-2.28
2014-12-04 02:50:16						2.01
2014-12-04 02:50:25										-1.71
2014-12-04 02:50:36			2.51	2.51
2014-12-04 02:50:55							-4.67
2014-12-04 02:51:03								0.05	-3.3
2014-12-04 02:51:18					-3.16
2014-12-04 02:51:23	0.52	-2.08
2014-12-04 02:51:46						1.99
2014-12-04 02:51:55										-1.61
2014-12-04 02:52:06			2.42	2.51
2014-12-04 02:52:25							-4.85
2014-12-04 02:52:33								0.05	-3.21
2014-12-04 02:52:48					-3.25
2014-12-04 02:52:53	0.64	-2.18
2014-12-04 02:53:16						2.01
2014-12-04 02:53:25										-1.57
2014-12-04 02:53:36			2.42	2.41
2014-12-04 02:53:55							-4.77
2014-12-04 02:54:03								0.05	-3.31
2014-12-04 02:54:18					-3.16
2014-12-04 02:54:23	0.64	-2.28
2014-12-04 02:54:46						2.09
2014-12-04 02:54:55										-1.71
2014-12-04 02:55:06			2.51	2.4
2014-12-04 02:55:25							-4.67
2014-12-04 02:55:33								0.15	-3.21
2014-12-04 02:55:48					-3.16
2014-12-04 02:55:53	0.54	-2.18
2014-12-04 02:56:16						2.09
2014-12-04 02:56:25										-1.81
2014-12-04 02:56:36			2.42	2.41
2014-12-04 02:56:55							-4.85
2014-12-04 02:57:03								0.05	-3.21
2014-12-04 02:57:18					-3.16
2014-12-04 02:57:23	0.64	-2.28
2014-12-04 02:57:46						2.09
2014-12-04 02:57:55										-1.71
2014-12-04 02:58:06			2.23	2.4
2014-12-04 02:58:25							-4.92
2014-12-04 02:58:33								0.05	-3.39
2014-12-04 02:58:48					-3.25
2014-12-04 02:58:53	0.64	-2.25
2014-12-04 02:59:16						2.01
2014-12-04 02:59:25										-1.71
2014-12-04 02:59:36			2.33	2.3
2014-12-04 02:59:55							-4.75
2014-12-04 03:00:03								0.05	-3.3
2014-12-04 03:00:18					-3.05
2014-12-04 03:00:23	0.54	-2.18
2014-12-04 03:00:46						2.09
2014-12-04 03:00:55										-1.71
2014-12-04 03:01:06			2.42	2.41
2014-12-04 03:01:25							-4.75
2014-12-04 03:01:33								0.05	-3.21
2014-12-04 03:01:48					-3.15
2014-12-04 03:01:53	0.54	-2.18
2014-12-04 03:02:16						1.91
2014-12-04 03:02:25										-1.81
2014-12-04 03:02:36			2.42	2.41
2014-12-04 03:02:55							-4.92
2014-12-04 03:03:03								0.05	-3.3
2014-12-04 03:03:18					-3.06
2014-12-04 03:03:23	0.54	-2.18
2014-12-04 03:03:46						2.01
2014-12-04 03:03:55										-1.71
2014-12-04 03:04:06			2.42	2.51
2014-12-04 03:04:25							-4.75
2014-12-04 03:04:33								0.05	-3.21
2014-12-04 03:04:48					-3.15
2014-12-04 03:04:53	0.64	-2.18
2014-12-04 03:05:16						2.09
2014-12-04 03:05:25										-1.71
2014-12-04 03:05:36			2.52	2.4
2014-12-04 03:05:55							-4.75
2014-12-04 03:06:03								0.05	-3.3
2014-12-04 03:06:18					-3.15
2014-12-04 03:06:23	0.64	-2.18
2014-12-04 03:06:46						2.19
2014-12-04 03:06:55										-1.81
2014-12-04 03:07:06			2.52	2.4
2014-12-04 03:07:25							-4.92
2014-12-04 03:07:33								0.05	-3.2
2014-12-04 03:07:48					-3.16
2014-12-04 03:07:53	0.64	-2.18
2014-12-04 03:08:16						2.01
2014-12-04 03:08:25										-1.71
2014-12-04 03:08:36			2.42	2.41
2014-12-04 03:08:55							-5.02
2014-12-04 03:09:03								0.05	-3.21
2014-12-04 03:09:18					-3.15
2014-12-04 03:09:23	0.54	-2.35
2014-12-04 03:09:46						2.09
2014-12-04 03:09:55										-1.81
2014-12-04 03:10:06			2.52	2.3
2014-12-04 03:10:25							-4.92
2014-12-04 03:10:33								0.05	-3.11
2014-12-04 03:10:48					-3.25
2014-12-04 03:10:53	0.54	-2.28
2014-12-04 03:11:16						1.99
2014-12-04 03:11:25										-1.81
2014-12-04 03:11:36			2.52	2.3
2014-12-04 03:11:55							-4.85
2014-12-04 03:12:03								0.05	-3.21
2014-12-04 03:12:18					-3.06
2014-12-04 03:12:23	0.64	-2.25
2014-12-04 03:12:46						2.09
2014-12-04 03:12:55										-1.96
2014-12-04 03:13:06			2.42	2.41
2014-12-04 03:13:24							-4.92
2014-12-04 03:13:33								0.05	-3.21
2014-12-04 03:13:48					-3.06
2014-12-04 03:13:53	0.52	-2.18
2014-12-04 03:14:16						1.91
2014-12-04 03:14:25										-1.71
2014-12-04 03:14:36			2.42	2.3
2014-12-04 03:14:54							-4.92
2014-12-04 03:15:03								0.05	-3.31
2014-12-04 03:15:18					-3.25
2014-12-04 03:15:23	0.64	-2.08
2014-12-04 03:15:46						2.09
2014-12-04 03:15:55										-1.71
2014-12-04 03:16:06			2.33	2.3
2014-12-04 03:16:24							-4.85
2014-12-04 03:16:33								0.05	-3.21
2014-12-04 03:16:48					-3.25
2014-12-04 03:16:53	0.66	-2.18
2014-12-04 03:17:16						2.09
2014-12-04 03:17:25										-1.67
2014-12-04 03:17:36			2.42	2.41
2014-12-04 03:17:54							-4.85
2014-12-04 03:18:03								0.05	-3.21
2014-12-04 03:18:18					-3.25
2014-12-04 03:18:23	0.64	-2.18
2014-12-04 03:18:46						2.09
2014-12-04 03:18:55										-1.96
2014-12-04 03:19:06			2.43	2.31
2014-12-04 03:19:24							-4.92
2014-12-04 03:19:33								0.05	-3.21
2014-12-04 03:19:48					-3.15
2014-12-04 03:19:53	0.64	-2.28
2014-12-04 03:20:16						1.91
2014-12-04 03:20:25										-1.96
2014-12-04 03:20:36			2.32	2.31
2014-12-04 03:20:54							-4.85
2014-12-04 03:21:03								0.05	-3.3
2014-12-04 03:21:18					-3.15
2014-12-04 03:21:23	0.54	-2.28
2014-12-04 03:21:46						2.01
2014-12-04 03:21:55										-1.71
2014-12-04 03:22:06			2.33	2.31
2014-12-04 03:22:24							-4.82
2014-12-04 03:22:33								0.05	-3.21
2014-12-04 03:22:48					-3.06
2014-12-04 03:22:53	0.64	-2.28
2014-12-04 03:23:16						1.91
2014-12-04 03:23:25										-1.71
2014-12-04 03:23:36			2.42	2.41
2014-12-04 03:23:54							-4.95
2014-12-04 03:24:03								0.05	-3.31
2014-12-04 03:24:18					-3.15
2014-12-04 03:24:23	0.64	-2.28
2014-12-04 03:24:46						2.01
2014-12-04 03:24:55										-1.71
2014-12-04 03:25:06			2.41	2.41
2014-12-04 03:25:24							-5.02
2014-12-04 03:25:33								0.05	-3.21
2014-12-04 03:25:48					-3.15
2014-12-04 03:25:53	0.54	-2.18
2014-12-04 03:26:16						2.01
2014-12-04 03:26:25										-1.71
2014-12-04 03:26:36			2.42	2.41
2014-12-04 03:26:54							-4.85
2014-12-04 03:27:03								0.15	-3.21
2014-12-04 03:27:18					-3.15
2014-12-04 03:27:23	0.42	-2.28
2014-12-04 03:27:46						1.99
2014-12-04 03:27:55										-1.81
2014-12-04 03:28:06			2.32	2.31
2014-12-04 03:28:24							-4.85
2014-12-04 03:28:33								0.05	-3.31
2014-12-04 03:28:48					-3.15
2014-12-04 03:28:53	0.54	-2.18
2014-12-04 03:29:16						1.91
2014-12-04 03:29:25										-1.81
2014-12-04 03:29:36			2.42	2.2
2014-12-04 03:29:54							-4.95
2014-12-04 03:30:03								0.15	-3.21
2014-12-04 03:30:18					-3.25
2014-12-04 03:30:23	0.64	-2.28
2014-12-04 03:30:46						1.99
2014-12-04 03:30:55										-1.96
2014-12-04 03:31:06			2.32	2.31
2014-12-04 03:31:24							-4.85
2014-12-04 03:31:33								0.05	-3.31
2014-12-04 03:31:48					-3.15
2014-12-04 03:31:53	0.42	-2.35
2014-12-04 03:32:16						2.09
2014-12-04 03:32:25										-1.81
2014-12-04 03:32:36			2.52	2.3
2014-12-04 03:32:54							-4.95
2014-12-04 03:33:03								0.05	-3.31
2014-12-04 03:33:18					-3.15
2014-12-04 03:33:23	0.54	-2.18
2014-12-04 03:33:46						2.09
2014-12-04 03:33:55										-1.91
2014-12-04 03:34:06			2.32	2.31
2014-12-04 03:34:24							-4.75
2014-12-04 03:34:33								0.05	-3.3
2014-12-04 03:34:48					-3.15
2014-12-04 03:34:53	0.54	-2.18
2014-12-04 03:35:16						2.01
2014-12-04 03:35:25										-1.71
2014-12-04 03:35:36			2.42	2.31
2014-12-04 03:35:54							-4.85
2014-12-04 03:36:03								0.05	-3.21
2014-12-04 03:36:18					-3.35
2014-12-04 03:36:23	0.76	-2.18
2014-12-04 03:36:46						2.09
2014-12-04 03:36:55										-1.81
2014-12-04 03:37:06			2.42	2.31
2014-12-04 03:37:23							-4.95
2014-12-04 03:37:33								0.05	-3.21
2014-12-04 03:37:48					-3.25
2014-12-04 03:37:53	0.54	-2.11
2014-12-04 03:38:16						2.09
2014-12-04 03:38:25										-1.81
2014-12-04 03:38:36			2.42	2.31
2014-12-04 03:38:53							-4.82
2014-12-04 03:39:03								0.05	-3.3
2014-12-04 03:39:18					-3.16
2014-12-04 03:39:23	0.44	-2.21
2014-12-04 03:39:46						1.99
2014-12-04 03:39:55										-1.81
2014-12-04 03:40:06			2.42	2.31
2014-12-04 03:40:23							-4.85
2014-12-04 03:40:33								0.15	-3.3
2014-12-04 03:40:48					-3.15
2014-12-04 03:40:53	0.54	-2.18
2014-12-04 03:41:16						2.01
2014-12-04 03:41:25										-1.81
2014-12-04 03:41:36			2.42	2.2
2014-12-04 03:41:53							-4.85
2014-12-04 03:42:03								0.05	-3.21
2014-12-04 03:42:18					-3.25
2014-12-04 03:42:23	0.54	-2.18
2014-12-04 03:42:46						1.91
2014-12-04 03:42:55										-1.81
2014-12-04 03:43:06			2.42	2.1
2014-12-04 03:43:23							-5.02
2014-12-04 03:43:33								0.05	-3.41
2014-12-04 03:43:48					-3.06
2014-12-04 03:43:53	0.52	-2.18
2014-12-04 03:44:16						1.99
2014-12-04 03:44:25										-1.71
2014-12-04 03:44:36			2.42	2.2
2014-12-04 03:44:53							-4.95
2014-12-04 03:45:03								0.05	-3.31
2014-12-04 03:45:18					-3.06
2014-12-04 03:45:23	0.54	-2.28
2014-12-04 03:45:46						1.99
2014-12-04 03:45:55										-1.67
2014-12-04 03:46:06			2.42	2.2
2014-12-04 03:46:23							-4.85
2014-12-04 03:46:33								0.05	-3.31
2014-12-04 03:46:48					-3.06
2014-12-04 03:46:53	0.54	-2.28
2014-12-04 03:47:16						2.01
2014-12-04 03:47:25										-1.67
2014-12-04 03:47:36			2.42	2.2
2014-12-04 03:47:53							-4.95
2014-12-04 03:48:03								0.05	-3.31
2014-12-04 03:48:18					-3.16
2014-12-04 03:48:23	0.54	-2.25
2014-12-04 03:48:46						2.09
2014-12-04 03:48:55										-1.71
2014-12-04 03:49:06			2.42	2.3
2014-12-04 03:49:23							-4.85
2014-12-04 03:49:33								0.05	-3.31
2014-12-04 03:49:48					-3.06
2014-12-04 03:49:53	0.76	-2.21
2014-12-04 03:50:16						1.91
2014-12-04 03:50:25										-1.81
2014-12-04 03:50:36			2.42	2.41
2014-12-04 03:50:53							-4.85
2014-12-04 03:51:03								0.05	-3.21
2014-12-04 03:51:18					-3.06
2014-12-04 03:51:23	0.54	-2.28
2014-12-04 03:51:46						1.99
2014-12-04 03:51:55										-1.91
2014-12-04 03:52:06			2.42	2.2
2014-12-04 03:52:23							-4.85
2014-12-04 03:52:33								0.15	-3.21
2014-12-04 03:52:48					-3.25
2014-12-04 03:52:53	0.52	-2.18
2014-12-04 03:53:16						1.91
2014-12-04 03:53:25										-1.71
2014-12-04 03:53:36			2.42	2.2
2014-12-04 03:53:53							-4.95
2014-12-04 03:54:03								0.05	-3.31
2014-12-04 03:54:18					-3.15
2014-12-04 03:54:23	0.54	-2.28
2014-12-04 03:54:46						1.81
2014-12-04 03:54:55										-1.61
2014-12-04 03:55:06			2.33	2.3
2014-12-04 03:55:23							-4.95
2014-12-04 03:55:33								0.05	-3.4
2014-12-04 03:55:48					-3.15
2014-12-04 03:55:53	0.42	-2.25
2014-12-04 03:56:16						1.91
2014-12-04 03:56:25										-1.81
2014-12-04 03:56:36			2.32	2.2
2014-12-04 03:56:53							-4.92
2014-12-04 03:57:03								0.05	-3.3
2014-12-04 03:57:18					-3.35
2014-12-04 03:57:23	0.32	-2.28
2014-12-04 03:57:46						1.91
2014-12-04 03:57:55										-1.71
2014-12-04 03:58:06			2.42	2.3
2014-12-04 03:58:23							-5.02
2014-12-04 03:58:33								0.15	-3.3
2014-12-04 03:58:48					-3.24
2014-12-04 03:58:53	0.66	-2.35
2014-12-04 03:59:16						1.81
2014-12-04 03:59:25										-1.96
2014-12-04 03:59:36			2.42	2.09
2014-12-04 03:59:53							-4.85
2014-12-04 04:00:03								0.25	-3.3
2014-12-04 04:00:18					-3.25
2014-12-04 04:00:23	0.42	-2.18
2014-12-04 04:00:46						1.81
2014-12-04 04:00:55										-1.96
2014-12-04 04:01:06			2.33	2.1
2014-12-04 04:01:23							-4.95
2014-12-04 04:01:33								0.25	-3.4
2014-12-04 04:01:48					-3.15
2014-12-04 04:01:53	0.66	-2.35
2014-12-04 04:02:16						1.91
2014-12-04 04:02:25										-1.86
2014-12-04 04:02:36			2.33	2.3
2014-12-04 04:02:53							-5.02
2014-12-04 04:03:03								0.15	-3.4
2014-12-04 04:03:18					-3.05
2014-12-04 04:03:23	0.52	-2.25
2014-12-04 04:03:46						1.91
2014-12-04 04:03:55										-1.96
2014-12-04 04:04:06			2.33	2.2
2014-12-04 04:04:22							-5.02
2014-12-04 04:04:33								0.15	-3.3
2014-12-04 04:04:48					-3.15
2014-12-04 04:04:53	0.54	-2.25
2014-12-04 04:05:16						1.74
2014-12-04 04:05:25										-1.71
2014-12-04 04:05:36			2.43	2.1
2014-12-04 04:05:52							-4.92
2014-12-04 04:06:03								0.05	-3.3
2014-12-04 04:06:18					-3.24
2014-12-04 04:06:23	0.42	-2.33
2014-12-04 04:06:46						1.91
2014-12-04 04:06:55										-2.06
2014-12-04 04:07:06			2.43	2.09
2014-12-04 04:07:22							-5
2014-12-04 04:07:33								0.15	-3.39
2014-12-04 04:07:48					-3.24
2014-12-04 04:07:53	0.42	-2.53
2014-12-04 04:08:16						1.84
2014-12-04 04:08:25										-1.86
2014-12-04 04:08:36			2.33	1.99
2014-12-04 04:08:52							-4.92
2014-12-04 04:09:03								0.15	-3.4
2014-12-04 04:09:18					-3.34
2014-12-04 04:09:23	0.42	-2.35
2014-12-04 04:09:46						1.99
2014-12-04 04:09:55										-1.96
2014-12-04 04:10:06			2.33	1.99
2014-12-04 04:10:22							-4.92
2014-12-04 04:10:33								0.15	-3.39
2014-12-04 04:10:48					-3.22
2014-12-04 04:10:53	0.32	-2.35
2014-12-04 04:11:16						1.84
2014-12-04 04:11:25										-1.86
2014-12-04 04:11:36			2.33	2.2
2014-12-04 04:11:52							-5
2014-12-04 04:12:03								0.05	-3.48
2014-12-04 04:12:18					-3.14
2014-12-04 04:12:23	0.42	-2.35
2014-12-04 04:12:46						1.84
2014-12-04 04:12:55										-2.1
2014-12-04 04:13:06			2.43	2.09
2014-12-04 04:13:22							-4.92
2014-12-04 04:13:33								0.15	-3.4
2014-12-04 04:13:48					-3.34
2014-12-04 04:13:53	0.44	-2.35
2014-12-04 04:14:16						1.84
2014-12-04 04:14:25										-1.86
2014-12-04 04:14:36			2.33	2.2
2014-12-04 04:14:52							-4.92
2014-12-04 04:15:03								0.15	-3.3
2014-12-04 04:15:18					-3.32
2014-12-04 04:15:23	0.64	-2.35
2014-12-04 04:15:46						1.84
2014-12-04 04:15:55										-1.86
2014-12-04 04:16:06			2.23	2.2
2014-12-04 04:16:22							-4.9
2014-12-04 04:16:33								0.25	-3.39
2014-12-04 04:16:48					-3.34
2014-12-04 04:16:53	0.42	-2.43
2014-12-04 04:17:16						1.91
2014-12-04 04:17:25										-2.1
2014-12-04 04:17:36			2.23	2.09
2014-12-04 04:17:52							-5
2014-12-04 04:18:03								0.05	-3.49
2014-12-04 04:18:18					-3.34
2014-12-04 04:18:23	0.32	-2.35
2014-12-04 04:18:46						1.84
2014-12-04 04:18:55										-1.9
2014-12-04 04:19:06			2.24	2.09
2014-12-04 04:19:22							-5
2014-12-04 04:19:33								0.15	-3.39
2014-12-04 04:19:48					-3.32
2014-12-04 04:19:53	0.42	-2.33
2014-12-04 04:20:16						1.66
2014-12-04 04:20:25										-2.1
2014-12-04 04:20:36			2.14	2
2014-12-04 04:20:52							-5
2014-12-04 04:21:03								0.35	-3.49
2014-12-04 04:21:18					-3.42
2014-12-04 04:21:23	0.42	-2.45
2014-12-04 04:21:46						1.74
2014-12-04 04:21:55										-2
2014-12-04 04:22:06			2.33	2.09
2014-12-04 04:22:22							-4.9
2014-12-04 04:22:33								0.15	-3.48
2014-12-04 04:22:48					-3.22
2014-12-04 04:22:53	0.42	-2.25
2014-12-04 04:23:16						1.74
2014-12-04 04:23:25										-2
2014-12-04 04:23:36			2.33	2.09
2014-12-04 04:23:52							-4.97
2014-12-04 04:24:03								0.25	-3.39
2014-12-04 04:24:18					-3.32
2014-12-04 04:24:23	0.42	-2.45
2014-12-04 04:24:46						1.74
2014-12-04 04:24:55										-2
2014-12-04 04:25:06			2.24	2.09
2014-12-04 04:25:22							-5
2014-12-04 04:25:33								0.25	-3.29
2014-12-04 04:25:48					-3.32
2014-12-04 04:25:53	0.52	-2.33
2014-12-04 04:26:16						1.76
2014-12-04 04:26:25										-1.9
2014-12-04 04:26:36			2.33	1.99
2014-12-04 04:26:52							-5
2014-12-04 04:27:03								0.25	-3.38
2014-12-04 04:27:18					-3.22
2014-12-04 04:27:23	0.52	-2.43
2014-12-04 04:27:46						1.74
2014-12-04 04:27:55										-2
2014-12-04 04:28:06			2.34	1.99
2014-12-04 04:28:22							-5
2014-12-04 04:28:33								0.05	-3.48
2014-12-04 04:28:48					-3.32
2014-12-04 04:28:53	0.3	-2.43
2014-12-04 04:29:16						1.66
2014-12-04 04:29:25										-2.04
2014-12-04 04:29:36			2.24	1.99
2014-12-04 04:29:52							-5.07
2014-12-04 04:30:03								0.25	-3.58
2014-12-04 04:30:18					-3.31
2014-12-04 04:30:23	0.42	-2.43
2014-12-04 04:30:46						1.66
2014-12-04 04:30:55										-2
2014-12-04 04:31:06			2.24	1.99
2014-12-04 04:31:22							-5.07
2014-12-04 04:31:33								0.25	-3.48
2014-12-04 04:31:48					-3.32
2014-12-04 04:31:53	0.4	-2.43
2014-12-04 04:32:16						1.76
2014-12-04 04:32:25										-1.9
2014-12-04 04:32:36			2.24	2.09
2014-12-04 04:32:52							-5
2014-12-04 04:33:03								0.05	-3.47
2014-12-04 04:33:18					-3.32
2014-12-04 04:33:23	0.3	-2.4
2014-12-04 04:33:46						1.66
2014-12-04 04:33:55										-2.14
2014-12-04 04:34:06			2.34	1.99
2014-12-04 04:34:21							-5.07
2014-12-04 04:34:33								0.25	-3.48
2014-12-04 04:34:48					-3.41
2014-12-04 04:34:53	0.4	-2.3
2014-12-04 04:35:16						1.66
2014-12-04 04:35:25										-2.1
2014-12-04 04:35:36			2.34	2.09
2014-12-04 04:35:51							-5.07
2014-12-04 04:36:03								0.45	-3.57
2014-12-04 04:36:18					-3.22
2014-12-04 04:36:23	0.4	-2.33
2014-12-04 04:36:46						1.76
2014-12-04 04:36:55										-2.14
2014-12-04 04:37:06			2.24	1.99
2014-12-04 04:37:21							-4.97
2014-12-04 04:37:33								0.35	-3.57
2014-12-04 04:37:48					-3.31
2014-12-04 04:37:53	0.3	-2.43
2014-12-04 04:38:16						1.66
2014-12-04 04:38:25										-1.9
2014-12-04 04:38:36			2.25	1.98
2014-12-04 04:38:51							-4.97
2014-12-04 04:39:03								0.25	-3.48
2014-12-04 04:39:18					-3.41
2014-12-04 04:39:23	0.18	-2.33
2014-12-04 04:39:46						1.68
2014-12-04 04:39:55										-2
2014-12-04 04:40:06			2.15	1.89
2014-12-04 04:40:21							-4.97
2014-12-04 04:40:33								0.35	-3.28
2014-12-04 04:40:48					-3.21
2014-12-04 04:40:53	0.28	-2.43
2014-12-04 04:41:16						1.66
2014-12-04 04:41:25										-2.14
2014-12-04 04:41:36			2.25	1.88
2014-12-04 04:41:51							-4.97
2014-12-04 04:42:03								0.15	-3.48
2014-12-04 04:42:18					-3.21
2014-12-04 04:42:23	0.3	-2.43
2014-12-04 04:42:46						1.58
2014-12-04 04:42:55										-2.14
2014-12-04 04:43:06			2.16	1.98
2014-12-04 04:43:21							-5.07
2014-12-04 04:43:33								0.25	-3.38
2014-12-04 04:43:48					-3.29
2014-12-04 04:43:53	0.18	-2.5
2014-12-04 04:44:16						1.58
2014-12-04 04:44:25										-2.14
2014-12-04 04:44:36			2.25	1.78
2014-12-04 04:44:51							-5.05
2014-12-04 04:45:03								0.35	-3.47
2014-12-04 04:45:18					-3.31
2014-12-04 04:45:23	0.3	-2.43
2014-12-04 04:45:46						1.51
2014-12-04 04:45:55										-2.28
2014-12-04 04:46:06			2.34	1.77
2014-12-04 04:46:21							-5.05
2014-12-04 04:46:33								0.45	-3.47
2014-12-04 04:46:48					-3.29
2014-12-04 04:46:53	0.4	-2.6
2014-12-04 04:47:16						1.51
2014-12-04 04:47:25										-2.08
2014-12-04 04:47:36			2.15	1.88
2014-12-04 04:47:51							-4.95
2014-12-04 04:48:03								0.35	-3.47
2014-12-04 04:48:18					-3.49
2014-12-04 04:48:23	0.3	-2.43
2014-12-04 04:48:46						1.58
2014-12-04 04:48:55										-2.18
2014-12-04 04:49:06			2.25	1.88
2014-12-04 04:49:21							-5.05
2014-12-04 04:49:33								0.35	-3.37
2014-12-04 04:49:48					-3.31
2014-12-04 04:49:53	0.18	-2.43
2014-12-04 04:50:16						1.61
2014-12-04 04:50:25										-2.18
2014-12-04 04:50:36			2.25	1.88
2014-12-04 04:50:51							-5.13
2014-12-04 04:51:03								0.35	-3.56
2014-12-04 04:51:18					-3.39
2014-12-04 04:51:23	0.4	-2.5
2014-12-04 04:51:46						1.51
2014-12-04 04:51:55										-2.32
2014-12-04 04:52:06			2.25	1.88
2014-12-04 04:52:21							-4.95
2014-12-04 04:52:33								0.45	-3.55
2014-12-04 04:52:48					-3.29
2014-12-04 04:52:53	0.4	-2.5
2014-12-04 04:53:16						1.58
2014-12-04 04:53:25										-2.08
2014-12-04 04:53:36			2.15	1.88
2014-12-04 04:53:51							-4.95
2014-12-04 04:54:03								0.45	-3.56
2014-12-04 04:54:18					-3.39
2014-12-04 04:54:23	0.2	-2.43
2014-12-04 04:54:46						1.51
2014-12-04 04:54:55										-2.18
2014-12-04 04:55:06			2.25	1.77
2014-12-04 04:55:21							-5.05
2014-12-04 04:55:33								0.35	-3.37
2014-12-04 04:55:48					-3.31
2014-12-04 04:55:53	0.18	-2.5
2014-12-04 04:56:16						1.41
2014-12-04 04:56:25										-2.08
2014-12-04 04:56:36			2.25	1.88
2014-12-04 04:56:51							-5.13
2014-12-04 04:57:03								0.35	-3.46
2014-12-04 04:57:18					-3.39
2014-12-04 04:57:23	0.3	-2.4
2014-12-04 04:57:46						1.41
2014-12-04 04:57:55										-2.08
2014-12-04 04:58:06			2.16	1.88
2014-12-04 04:58:21							-5.13
2014-12-04 04:58:33								0.45	-3.47
2014-12-04 04:58:48					-3.29
2014-12-04 04:58:53	0.28	-2.5
2014-12-04 04:59:16						1.51
2014-12-04 04:59:25										-2.08
2014-12-04 04:59:36			2.16	1.88
2014-12-04 04:59:51							-5.03
2014-12-04 05:00:03								0.35	-3.56
2014-12-04 05:00:18					-3.48
2014-12-04 05:00:23	0.38	-2.67
2014-12-04 05:00:46						1.51
2014-12-04 05:00:55										-2.22
2014-12-04 05:01:06			2.26	1.77
2014-12-04 05:01:21							-5.05
2014-12-04 05:01:33								0.45	-3.46
2014-12-04 05:01:48					-3.38
2014-12-04 05:01:53	0.06	-2.47
2014-12-04 05:02:16						1.43
2014-12-04 05:02:25										-2.22
2014-12-04 05:02:36			2.17	1.66
2014-12-04 05:02:51							-5.1
2014-12-04 05:03:03								0.45	-3.45
2014-12-04 05:03:18					-3.45
2014-12-04 05:03:23	0.04	-2.54
2014-12-04 05:03:46						1.45
2014-12-04 05:03:55										-2.26
2014-12-04 05:04:06			2.27	1.54
2014-12-04 05:04:21							-5.18
2014-12-04 05:04:33								0.54	-3.54
2014-12-04 05:04:48					-3.43
2014-12-04 05:04:53	0.01	-2.62
2014-12-04 05:05:16						1.28
2014-12-04 05:05:25										-2.26
2014-12-04 05:05:36			2.18	1.33
2014-12-04 05:05:51							-5.23
2014-12-04 05:06:03								0.64	-3.63
2014-12-04 05:06:18					-3.52
2014-12-04 05:06:23	0.03	-2.84
2014-12-04 05:06:46						1.2
2014-12-04 05:06:55										-2.51
2014-12-04 05:07:06			2.1	1.22
2014-12-04 05:07:21							-5.23
2014-12-04 05:07:33								0.64	-3.53
2014-12-04 05:07:48					-3.52
2014-12-04 05:07:53	0.25	-2.74
2014-12-04 05:08:16						1.22
2014-12-04 05:08:25										-2.51
2014-12-04 05:08:36			2.1	1.1
2014-12-04 05:08:51							-5.18
2014-12-04 05:09:03								0.74	-3.62
2014-12-04 05:09:18					-3.69
2014-12-04 05:09:23	0.15	-2.81
2014-12-04 05:09:46						1.12
2014-12-04 05:09:55										-2.65
2014-12-04 05:10:06			1.92	1.1
2014-12-04 05:10:21							-5.26
2014-12-04 05:10:33								0.84	-3.52
2014-12-04 05:10:48					-3.57
2014-12-04 05:10:53	0.27	-2.81
2014-12-04 05:11:16						1.12
2014-12-04 05:11:25										-2.55
2014-12-04 05:11:36			2.02	1.1
2014-12-04 05:11:51							-5.16
2014-12-04 05:12:03								0.84	-3.71
2014-12-04 05:12:18					-3.57
2014-12-04 05:12:23	0.27	-2.78
2014-12-04 05:12:46						1.22
2014-12-04 05:12:55										-2.69
2014-12-04 05:13:06			1.93	0.99
2014-12-04 05:13:21							-5.26
2014-12-04 05:13:33								0.74	-3.61
2014-12-04 05:13:48					-3.57
2014-12-04 05:13:53	0.29	-2.95
2014-12-04 05:14:16						1.05
2014-12-04 05:14:25										-2.59
2014-12-04 05:14:36			1.93	0.99
2014-12-04 05:14:51							-5.33
2014-12-04 05:15:03								0.84	-3.61
2014-12-04 05:15:18					-3.66
2014-12-04 05:15:23	0.29	-2.85
2014-12-04 05:15:46						1.05
2014-12-04 05:15:55										-2.59
2014-12-04 05:16:06			2.03	0.88
2014-12-04 05:16:21							-5.23
2014-12-04 05:16:33								0.84	-3.6
2014-12-04 05:16:48					-3.56
2014-12-04 05:16:53	0.31	-2.95
2014-12-04 05:17:16						0.97
2014-12-04 05:17:25										-2.59
2014-12-04 05:17:36			1.94	0.88
2014-12-04 05:17:51							-5.31
2014-12-04 05:18:03								0.84	-3.6
2014-12-04 05:18:18					-3.66
2014-12-04 05:18:23	0.31	-2.93
2014-12-04 05:18:46						0.89
2014-12-04 05:18:55										-2.49
2014-12-04 05:19:06			1.85	0.98
2014-12-04 05:19:21							-5.21
2014-12-04 05:19:33								0.94	-3.79
2014-12-04 05:19:48					-3.64
2014-12-04 05:19:53	0.21	-2.95
2014-12-04 05:20:16						0.79
2014-12-04 05:20:25										-2.59
2014-12-04 05:20:36			2.04	0.88
2014-12-04 05:20:51							-5.21
2014-12-04 05:21:03								0.94	-3.6
2014-12-04 05:21:18					-3.64
2014-12-04 05:21:23	0.31	-3.03
2014-12-04 05:21:46						0.89
2014-12-04 05:21:55										-2.59
2014-12-04 05:22:06			1.85	0.88
2014-12-04 05:22:21							-5.29
2014-12-04 05:22:33								0.74	-3.6
2014-12-04 05:22:48					-3.63
2014-12-04 05:22:53	0.21	-2.93
2014-12-04 05:23:16						0.89
2014-12-04 05:23:25										-2.73
2014-12-04 05:23:36			1.95	0.87
2014-12-04 05:23:51							-5.39
2014-12-04 05:24:03								0.94	-3.69
2014-12-04 05:24:18					-3.64
2014-12-04 05:24:23	0.41	-3.1
2014-12-04 05:24:46						0.89
2014-12-04 05:24:55										-2.73
2014-12-04 05:25:06			1.76	0.87
2014-12-04 05:25:20							-5.39
2014-12-04 05:25:33								0.94	-3.69
2014-12-04 05:25:48					-3.63
2014-12-04 05:25:53	0.43	-3.1
2014-12-04 05:26:16						0.82
2014-12-04 05:26:25										-2.87
2014-12-04 05:26:36			1.76	0.87
2014-12-04 05:26:50							-5.29
2014-12-04 05:27:03								-1.04	-3.88
2014-12-04 05:27:18					-3.71
2014-12-04 05:27:23	0.55	-3.1
2014-12-04 05:27:46						0.89
2014-12-04 05:27:55										-2.77
2014-12-04 05:28:06			1.86	0.77
2014-12-04 05:28:20							-5.29
2014-12-04 05:28:33								-1.04	-3.69
2014-12-04 05:28:48					-3.73
2014-12-04 05:28:53	0.43	-3.07
2014-12-04 05:29:16						0.72
2014-12-04 05:29:25										-2.77
2014-12-04 05:29:36			1.86	0.66
2014-12-04 05:29:50							-5.26
2014-12-04 05:30:03								-1.04	-3.68
2014-12-04 05:30:18					-3.73
2014-12-04 05:30:23	0.55	-3
2014-12-04 05:30:46						0.74
2014-12-04 05:30:55										-2.87
2014-12-04 05:31:06			1.96	0.87
2014-12-04 05:31:20							-5.26
2014-12-04 05:31:33								0.84	-3.78
2014-12-04 05:31:48					-3.81
2014-12-04 05:31:53	0.55	-3.07
2014-12-04 05:32:16						0.82
2014-12-04 05:32:25										-2.77
2014-12-04 05:32:36			1.76	0.76
2014-12-04 05:32:50							-5.34
2014-12-04 05:33:03								-1.04	-3.77
2014-12-04 05:33:18					-3.71
2014-12-04 05:33:23	0.45	-3.07
2014-12-04 05:33:46						0.92
2014-12-04 05:33:55										-2.91
2014-12-04 05:34:06			1.86	0.65
2014-12-04 05:34:20							-5.44
2014-12-04 05:34:33								-1.04	-3.78
2014-12-04 05:34:48					-3.7
2014-12-04 05:34:53	0.35	-3.25
2014-12-04 05:35:16						0.64
2014-12-04 05:35:25										-2.77
2014-12-04 05:35:36			1.96	0.65
2014-12-04 05:35:50							-5.34
2014-12-04 05:36:03								-1.04	-3.58
2014-12-04 05:36:18					-3.61
2014-12-04 05:36:23	0.67	-3.15
2014-12-04 05:36:46						0.74
2014-12-04 05:36:55										-2.81
2014-12-04 05:37:06			1.86	0.66
2014-12-04 05:37:20							-5.24
2014-12-04 05:37:33								-1.04	-3.68
2014-12-04 05:37:48					-3.8
2014-12-04 05:37:53	0.47	-3.15
2014-12-04 05:38:16						0.74
2014-12-04 05:38:25										-2.81
2014-12-04 05:38:36			1.86	0.55
2014-12-04 05:38:50							-5.34
2014-12-04 05:39:03								0.94	-3.57
2014-12-04 05:39:18					-3.7
2014-12-04 05:39:23	0.57	-3.25
2014-12-04 05:39:46						0.74
2014-12-04 05:39:55										-2.91
2014-12-04 05:40:06			1.87	0.65
2014-12-04 05:40:20							-5.24
2014-12-04 05:40:33								-1.14	-3.67
2014-12-04 05:40:48					-3.7
2014-12-04 05:40:53	0.47	-3.17
2014-12-04 05:41:16						0.66
2014-12-04 05:41:25										-2.81
2014-12-04 05:41:36			1.87	0.65
2014-12-04 05:41:50							-5.31
2014-12-04 05:42:03								-1.04	-3.75
2014-12-04 05:42:18					-3.78
2014-12-04 05:42:23	0.47	-3.25
2014-12-04 05:42:46						0.66
2014-12-04 05:42:55										-2.86
2014-12-04 05:43:06			1.87	0.64
2014-12-04 05:43:20							-5.41
2014-12-04 05:43:33								-1.04	-3.65
2014-12-04 05:43:48					-3.78
2014-12-04 05:43:53	0.47	-3.22
2014-12-04 05:44:16						0.74
2014-12-04 05:44:25										-2.96
2014-12-04 05:44:36			1.68	0.64
2014-12-04 05:44:50							-5.41
2014-12-04 05:45:03								-1.14	-3.67
2014-12-04 05:45:18					-3.78
2014-12-04 05:45:23	0.69	-3.25
2014-12-04 05:45:46						0.66
2014-12-04 05:45:55										-2.81
2014-12-04 05:46:06			1.68	0.43
2014-12-04 05:46:20							-5.41
2014-12-04 05:46:33								-1.14	-3.75
2014-12-04 05:46:48					-3.68
2014-12-04 05:46:53	0.59	-3.22
2014-12-04 05:47:16						0.66
2014-12-04 05:47:25										-2.96
2014-12-04 05:47:36			1.77	0.54
2014-12-04 05:47:50							-5.29
2014-12-04 05:48:03								-1.34	-3.67
2014-12-04 05:48:18					-3.78
2014-12-04 05:48:23	0.71	-3.32
2014-12-04 05:48:46						0.59
2014-12-04 05:48:55										-2.86
2014-12-04 05:49:06			1.87	0.43
2014-12-04 05:49:20							-5.39
2014-12-04 05:49:33								-1.14	-3.84
2014-12-04 05:49:48					-3.68
2014-12-04 05:49:53	0.59	-3.32
2014-12-04 05:50:16						0.69
2014-12-04 05:50:25										-2.96
2014-12-04 05:50:36			1.98	0.43
2014-12-04 05:50:50							-5.37
2014-12-04 05:51:03								-1.04	-3.94
2014-12-04 05:51:18					-3.77
2014-12-04 05:51:23	0.61	-3.19
2014-12-04 05:51:46						0.69
2014-12-04 05:51:55										-2.96
2014-12-04 05:52:06			1.69	0.32
2014-12-04 05:52:20							-5.29
2014-12-04 05:52:33								-1.14	-3.84
2014-12-04 05:52:48					-3.77
2014-12-04 05:52:53	0.61	-3.22
2014-12-04 05:53:16						0.69
2014-12-04 05:53:25										-2.96
2014-12-04 05:53:36			1.79	0.32
2014-12-04 05:53:50							-5.19
2014-12-04 05:54:03								-1.24	-3.84
2014-12-04 05:54:18					-3.77
2014-12-04 05:54:23	0.71	-3.29
2014-12-04 05:54:46						0.69
2014-12-04 05:54:55										-2.96
2014-12-04 05:55:06			1.79	0.53
2014-12-04 05:55:20							-5.29
2014-12-04 05:55:33								-1.24	-3.75
2014-12-04 05:55:48					-3.85
2014-12-04 05:55:53	0.61	-3.36
2014-12-04 05:56:16						0.59
2014-12-04 05:56:25										-2.9
2014-12-04 05:56:36			1.79	0.32
2014-12-04 05:56:50							-5.37
2014-12-04 05:57:03								-1.14	-3.65
2014-12-04 05:57:18					-3.77
2014-12-04 05:57:23	0.73	-3.36
2014-12-04 05:57:46						0.59
2014-12-04 05:57:55										-3
2014-12-04 05:58:06			1.89	0.42
2014-12-04 05:58:20							-5.37
2014-12-04 05:58:33								-1.14	-3.74
2014-12-04 05:58:48					-3.85
2014-12-04 05:58:53	0.73	-3.46
2014-12-04 05:59:16						0.61
2014-12-04 05:59:25										-3
2014-12-04 05:59:36			1.89	0.42
2014-12-04 05:59:50							-5.27
2014-12-04 06:00:03								-1.14	-3.74
2014-12-04 06:00:18					-3.75
2014-12-04 06:00:23	0.61	-3.26
2014-12-04 06:00:46						0.71
2014-12-04 06:00:55										-3
2014-12-04 06:01:06			1.8	0.42
2014-12-04 06:01:20							-5.37
2014-12-04 06:01:33								-1.14	-3.74
2014-12-04 06:01:48					-3.75
2014-12-04 06:01:53	0.73	-3.26
2014-12-04 06:02:16						0.51
2014-12-04 06:02:25										-2.86
2014-12-04 06:02:36			1.8	0.31
2014-12-04 06:02:50							-5.34
2014-12-04 06:03:03								-1.23	-3.74
2014-12-04 06:03:18					-3.65
2014-12-04 06:03:23	0.73	-3.36
2014-12-04 06:03:46						0.51
2014-12-04 06:03:55										-3
2014-12-04 06:04:06			1.51	0.42
2014-12-04 06:04:20							-5.27
2014-12-04 06:04:33								-1.14	-3.82
2014-12-04 06:04:48					-3.84
2014-12-04 06:04:53	0.63	-3.36
2014-12-04 06:05:16						0.53
2014-12-04 06:05:25										-3
2014-12-04 06:05:36			1.8	0.21
2014-12-04 06:05:50							-5.34
2014-12-04 06:06:03								-1.14	-3.83
2014-12-04 06:06:18					-3.75
2014-12-04 06:06:23	0.75	-3.36
2014-12-04 06:06:46						0.61
2014-12-04 06:06:55										-2.94
2014-12-04 06:07:06			1.71	0.41
2014-12-04 06:07:20							-5.27
2014-12-04 06:07:33								-1.23	-3.83
2014-12-04 06:07:48					-3.84
2014-12-04 06:07:53	0.73	-3.26
[truncated: 18,120 more rows]
