# Supplementary material for: Determining the scale at which variation in a single gene changes population yields
Source: eLife. 2020 Feb 14;9:e53517. doi: 10.7554/eLife.53517 (PMC7136025; doi:10.7554/eLife.53517)
Supplement: Figure 3—source data 1. [file elife-53517-fig3-data1.xlsx]

## Sheet: Feuil1
Figure 3B									Figure 3C										Figure 3D									Figure 3E									Figure 3F									Figure 3G
Field Row Number	Field Column Number	Population Number	Plant ID	% irMPK4 in Population	AMF Interaction	Genotype	Diameter (cm)		Field Row Number	Field Column Number	Population Number	Part of Plot	AMF Interaction	% irMPK4 in Population	Genotype	Days post planting	Stalk Height (cm)		Field Row Number	Field Column Number	Population Number	Plant ID	Part of Plot	% irMPK4 in Population	Genotype	Shoot Biomass (g DM)		Field Row Number	Field Column Number	Population Number	Plant ID	Part of the Plot	% irMPK4 in Population	Genotype	Root Biomass (g)		Field Row Number	Field Column Number	Population Number	Part of the Plot	AMF Interaction	% irMPK4 in Population	Genotype	Unripe Seed Capsules (#)		Field Row Number	Field Column Number	Population Number	Part of the Plot
1	2	2	3	75	No	EVxCC	2.92		4	1	9	1	No	0	EVxCC	27.5	15		4	1	9	17	1	0	EVxCC	1.664		4	1	9	17	1	0	EVxCC	0.224		4	1	9	1	No	0	EVxCC	15		4	1	9	1
1	2	2	4	75	No	MPxCC	3.02		4	2	10	1	No	75	EVxCC	27.5	6		4	1	9	18	1	0	EVxCC	1.574		4	1	9	18	1	0	EVxCC	0.15		4	1	9	1	No	0	EVxCC	18		4	1	9	1
4	1	9	17	0	No	EVxCC	3.51		6	1	14	1	No	25	EVxCC	27.5	24		6	1	14	31	1	25	EVxCC	3.222		6	1	14	31	1	25	EVxCC	0.409		4	1	9	1	No	0	EVxCC	20		4	1	9	1
4	1	9	18	0	No	EVxCC	3.08		8	1	19	1	No	75	EVxCC	27.5	3		8	1	19	41	1	75	EVxCC	1.863		8	1	19	41	1	75	EVxCC	0.211		4	1	9	1	No	0	EVxCC	9		4	1	9	1
4	1	9	19	0	No	EVxCC	2.98		9	3	23	1	No	0	EVxCC	27.5	4		9	3	23	49	1	0	EVxCC	3.415		9	3	23	49	1	0	EVxCC	0.42		6	1	14	1	No	25	EVxCC	77		6	1	14	1
4	1	9	20	0	No	EVxCC	3.08		1	4	24	1	No	25	EVxCC	27.5	16		9	3	23	50	1	0	EVxCC	3.365		9	3	23	50	1	0	EVxCC	0.312		8	1	19	1	No	75	EVxCC	4		8	1	19	1
4	2	10	21	75	No	EVxCC	3.94		3	4	29	1	No	75	EVxCC	27.5	12		9	3	23	51	1	0	EVxCC	4.081		9	3	23	51	1	0	EVxCC	0.412		9	3	23	1	No	0	EVxCC	37		9	3	23	1
4	2	10	22	75	No	MPxCC	2.58		5	5	35	1	No	0	EVxCC	27.5	20		9	3	23	52	1	0	EVxCC	4.981		9	3	23	52	1	0	EVxCC	0.397		9	3	23	1	No	0	EVxCC	24		9	3	23	1
5	2	12	27	100	No	MPxCC	2.58		5	5	35	1	No	0	EVxCC	27.5	19		5	5	35	77	1	0	EVxCC	3.567		5	5	35	77	1	0	EVxCC	0.623		9	3	23	1	No	0	EVxCC	5		9	3	23	1
5	2	12	28	100	No	MPxCC	2.66		5	5	35	1	No	0	EVxCC	27.5	5		9	4	44	101	1	25	EVxCC	3.258		9	4	44	101	1	25	EVxCC	0.313		5	5	35	1	No	0	EVxCC	8		9	3	23	1
6	1	14	31	25	No	EVxCC	5.38		5	5	35	1	No	0	EVxCC	27.5	20		11	5	50	115	1	25	EVxCC	3.114		11	5	50	115	1	25	EVxCC	0.48		9	4	44	1	No	25	EVxCC	76		5	5	35	1
6	1	14	32	25	No	MPxCC	2.99		9	4	44	1	No	25	EVxCC	27.5	18		13	5	55	125	1	75	EVxCC	4.91		13	5	55	125	1	75	EVxCC	0.658		11	5	50	1	No	25	EVxCC	3		5	5	35	1
7	2	17	37	100	No	MPxCC	3.5		11	5	50	1	No	25	EVxCC	27.5	18		16	4	62	143	1	75	EVxCC	13.616		16	4	62	143	1	75	EVxCC	1.514		13	5	55	1	No	75	EVxCC	64		9	4	44	1
7	2	17	38	100	No	MPxCC	2.81		13	5	55	1	No	75	EVxCC	27.5	7		19	4	69	161	1	25	EVxCC	9.335		19	4	69	161	1	25	EVxCC	1.322		16	4	62	1	No	75	EVxCC	31		11	5	50	1
8	1	19	41	75	No	EVxCC	2.61		19	4	69	1	No	25	EVxCC	27.5	24		26	4	87	201	1	25	EVxCC	4.388		26	4	87	201	1	25	EVxCC	0.628		19	4	69	1	No	25	EVxCC	125		13	5	55	1
8	1	19	42	75	No	MPxCC	2.62		26	4	87	1	No	25	EVxCC	27.5	11		26	5	88	203	1	0	EVxCC	9.585		26	5	88	203	1	0	EVxCC	1.281		21	5	75	1	No	75	EVxCC	0		16	4	62	1
8	2	20	43	25	No	EVxCC	4.46		26	5	88	1	No	0	EVxCC	27.5	10		26	5	88	206	1	0	EVxCC	5.483		26	5	88	206	1	0	EVxCC	0.714		26	4	87	1	No	25	EVxCC	44		19	4	69	1
8	2	20	44	25	No	MPxCC	3.22		26	5	88	1	No	0	EVxCC	27.5	15		10	1	96	223	2	75	EVxCC	2.71		10	1	96	223	2	75	EVxCC	0.378		26	5	88	1	No	0	EVxCC	86		21	5	75	1
9	3	23	49	0	No	EVxCC	3.45		26	5	88	1	No	0	EVxCC	27.5	11		15	1	108	251	2	25	EVxCC	2.34		15	1	108	251	2	25	EVxCC	0.243		26	5	88	1	No	0	EVxCC	123		26	4	87	1
9	3	23	50	0	No	EVxCC	3.31		28	4	92	1	No	0	EVxCC	27.5	7		18	1	116	267	2	75	EVxCC	3.062		18	1	116	267	2	75	EVxCC	0.402		26	5	88	1	No	0	EVxCC	15		26	5	88	1
9	3	23	51	0	No	EVxCC	3.92		28	4	92	1	No	0	EVxCC	27.5	13		22	2	127	295	2	25	EVxCC	24.654		22	2	127	295	2	25	EVxCC	2.666		28	4	92	1	No	0	EVxCC	16		26	5	88	1
9	3	23	52	0	No	EVxCC	3.05		28	4	92	1	No	0	EVxCC	27.5	13		28	1	142	329	2	25	EVxCC	3.967		28	1	142	329	2	25	EVxCC	0.51		28	4	92	1	No	0	EVxCC	73		28	4	92	1
1	4	24	53	25	No	EVxCC	4.2		13	2	104	2	No	75	EVxCC	27.5	23		6	1	14	32	1	25	MPxCC	1.605		6	1	14	32	1	25	MPxCC	0.163		10	1	96	2	No	75	EVxCC	5		28	4	92	1
1	4	24	54	25	No	MPxCC	3.15		14	2	107	2	No	25	EVxCC	27.5	22		7	2	17	37	1	100	MPxCC	3.701		7	2	17	37	1	100	MPxCC	0.541		13	2	104	2	No	75	EVxCC	0		10	1	96	2
2	3	26	57	100	No	MPxCC	3.71		15	1	108	2	No	25	EVxCC	27.5	27		8	1	19	42	1	75	MPxCC	1.273		8	1	19	42	1	75	MPxCC	0.148		15	1	108	2	No	25	EVxCC	6		14	2	107	2
2	3	26	58	100	No	MPxCC	3.18		16	1	111	2	No	75	EVxCC	27.5	22		9	4	44	102	1	25	MPxCC	2.225		9	4	44	102	1	25	MPxCC	0.324		18	1	116	2	No	75	EVxCC	4		15	1	108	2
2	5	28	61	100	No	MPxCC	2.94		18	1	116	2	No	75	EVxCC	27.5	18		11	5	50	116	1	25	MPxCC	0.744		11	5	50	116	1	25	MPxCC	0.11		19	1	118	2	No	0	EVxCC	0		16	1	111	2
2	5	28	62	100	No	MPxCC	1.56		18	2	117	2	No	0	EVxCC	27.5	16		13	5	55	126	1	75	MPxCC	2.755		13	5	55	126	1	75	MPxCC	0.308		22	2	127	2	No	25	EVxCC	74		18	1	116	2
3	4	29	63	75	No	EVxCC	4.14		18	2	117	2	No	0	EVxCC	27.5	19		19	4	69	162	1	25	MPxCC	8.892		19	4	69	162	1	25	MPxCC	0.907		28	1	142	2	No	25	EVxCC	12		18	2	117	2
3	4	29	64	75	No	MPxCC	2.86		18	2	117	2	No	0	EVxCC	27.5	14		21	5	75	174	1	75	MPxCC	1.978		21	5	75	174	1	75	MPxCC	0.276		29	3	144	2	No	25	EVxCC	0		19	1	118	2
3	5	30	65	25	No	EVxCC	6.23		18	2	117	2	No	0	EVxCC	27.5	23		27	4	89	208	1	100	MPxCC	8.136		27	4	89	208	1	100	MPxCC	0.931		6	1	14	1	No	25	MPxCC	15		22	2	127	2
3	5	30	66	25	No	MPxCC	2.98		19	1	118	2	No	0	EVxCC	27.5	16		29	5	95	221	1	100	MPxCC	5.858		29	5	95	221	1	100	MPxCC	0.571		7	2	17	1	No	100	MPxCC	31		24	2	132	2
4	4	32	69	100	No	MPxCC	3.51		19	1	118	2	No	0	EVxCC	27.5	19		29	5	95	222	1	100	MPxCC	5.117		10	1	96	224	2	75	MPxCC	0.297		8	1	19	1	No	75	MPxCC	8		28	1	142	2
4	4	32	70	100	No	MPxCC	2.84		19	1	118	2	No	0	EVxCC	27.5	14		10	1	96	224	2	75	MPxCC	2.026		15	1	108	252	2	25	MPxCC	0.114		9	4	44	1	No	25	MPxCC	42		29	3	144	2
5	5	35	77	0	No	EVxCC	5.03		22	2	127	2	No	25	EVxCC	27.5	23		15	1	108	252	2	25	MPxCC	1.159		22	2	127	296	2	25	MPxCC	1.55		11	5	50	1	No	25	MPxCC	0		6	1	14	1
5	5	35	78	0	No	EVxCC	4.92		23	2	129	2	No	75	EVxCC	27.5	18		22	2	127	296	2	25	MPxCC	14.075		25	1	133	312	2	25	MPxCC	0.83		13	5	55	1	No	75	MPxCC	37		7	2	17	1
5	5	35	79	0	No	EVxCC	4		24	2	132	2	No	0	EVxCC	27.5	9		25	1	133	312	2	25	MPxCC	3.102		28	1	142	330	2	25	MPxCC	0.402		19	4	69	1	No	25	MPxCC	84		8	1	19	1
5	5	35	80	0	No	EVxCC	5.7		24	2	132	2	No	0	EVxCC	27.5	11		26	1	136	317	2	100	MPxCC	1.403											21	5	75	1	No	75	MPxCC	0		9	4	44	1
6	4	37	83	25	No	EVxCC	2.98		24	2	132	2	No	0	EVxCC	27.5	5		26	1	136	318	2	100	MPxCC	1.971											27	4	89	1	No	100	MPxCC	73		11	5	50	1
6	4	37	84	25	No	MPxCC	3.79		24	2	132	2	No	0	EVxCC	27.5	10		28	1	142	330	2	25	MPxCC	4.338											29	5	95	1	No	100	MPxCC	54		13	5	55	1
7	4	39	87	100	No	MPxCC	2.13		25	1	133	2	No	25	EVxCC	27.5	13																				29	5	95	1	No	100	MPxCC	37		16	4	62	1
7	4	39	88	100	No	MPxCC	3.05		27	3	141	2	No	75	EVxCC	27.5	5																				10	1	96	2	No	75	MPxCC	9		19	4	69	1
7	5	40	89	0	No	EVxCC	5		29	3	144	2	No	25	EVxCC	27.5	7																				15	1	108	2	No	25	MPxCC	0		21	5	75	1
7	5	40	90	0	No	EVxCC	6.37		4	1	9	1	No	0	EVxCC	33.5	36																				22	2	127	2	No	25	MPxCC	37		27	4	89	1
7	5	40	91	0	No	EVxCC	4.81		4	1	9	1	No	0	EVxCC	33.5	32																				25	1	133	2	No	25	MPxCC	2		10	1	96	2
7	5	40	92	0	No	EVxCC	5.19		4	1	9	1	No	0	EVxCC	33.5	30																				26	1	136	2	No	100	MPxCC	2		12	2	102	2
8	4	42	95	75	No	EVxCC	5.74		4	1	9	1	No	0	EVxCC	33.5	26																				26	1	136	2	No	100	MPxCC	5		15	1	108	2
8	4	42	96	75	No	MPxCC	3.57		4	2	10	1	No	75	EVxCC	33.5	22.5																				28	1	142	2	No	25	MPxCC	9		19	3	120	2
9	4	44	101	25	No	EVxCC	5.64		6	1	14	1	No	25	EVxCC	33.5	40																													22	2	127	2
9	4	44	102	25	No	MPxCC	3.7		8	1	19	1	No	75	EVxCC	33.5	13																													25	1	133	2
9	5	45	103	100	No	MPxCC	3.34		8	2	20	1	No	25	EVxCC	33.5	23																													27	3	141	2
9	5	45	104	100	No	MPxCC	2.75		9	3	23	1	No	0	EVxCC	33.5	15.5																													28	1	142	2
10	3	46	105	100	No	MPxCC	3.37		9	3	23	1	No	0	EVxCC	33.5	29.5
10	3	46	106	100	No	MPxCC	4.22		9	3	23	1	No	0	EVxCC	33.5	24
10	5	48	109	0	No	EVxCC	3.75		9	3	23	1	No	0	EVxCC	33.5	19
10	5	48	110	0	No	EVxCC	3.83		1	4	24	1	No	25	EVxCC	33.5	18.5
10	5	48	111	0	No	EVxCC	3.13		3	4	29	1	No	75	EVxCC	33.5	33
10	5	48	112	0	No	EVxCC	4.79		5	5	35	1	No	0	EVxCC	33.5	34.5
11	4	49	113	75	No	EVxCC	4.96		5	5	35	1	No	0	EVxCC	33.5	27
11	4	49	114	75	No	MPxCC	2.78		5	5	35	1	No	0	EVxCC	33.5	28.5
11	5	50	115	25	No	EVxCC	5.31		9	4	44	1	No	25	EVxCC	33.5	40
11	5	50	116	25	No	MPxCC	2.25		11	5	50	1	No	25	EVxCC	33.5	37
12	4	52	119	100	No	MPxCC	4.37		13	5	55	1	No	75	EVxCC	33.5	22.5
12	4	52	120	100	No	MPxCC	4.16		16	4	62	1	No	75	EVxCC	33.5	23
13	5	55	125	75	No	EVxCC	4.96		19	4	69	1	No	25	EVxCC	33.5	41
13	5	55	126	75	No	MPxCC	3.66		21	5	75	1	No	75	EVxCC	33.5	30
14	4	57	131	100	No	MPxCC	5.54		26	4	87	1	No	25	EVxCC	33.5	26
14	4	57	132	100	No	MPxCC	4.03		26	5	88	1	No	0	EVxCC	33.5	25
15	4	59	135	0	No	EVxCC	4.74		26	5	88	1	No	0	EVxCC	33.5	34.5
15	4	59	136	0	No	EVxCC	4.39		26	5	88	1	No	0	EVxCC	33.5	31
15	4	59	137	0	No	EVxCC	4.26		28	4	92	1	No	0	EVxCC	33.5	23
15	4	59	138	0	No	EVxCC	4.22		28	4	92	1	No	0	EVxCC	33.5	36
16	4	62	143	75	No	EVxCC	3.89		28	4	92	1	No	0	EVxCC	33.5	34
16	4	62	144	75	No	MPxCC	4.09		28	4	92	1	No	0	EVxCC	33.5	37.5
16	5	63	145	100	No	MPxCC	4.7		10	1	96	2	No	75	EVxCC	33.5	38
16	5	63	146	100	No	MPxCC	3.94		13	2	104	2	No	75	EVxCC	33.5	56
17	5	65	151	25	No	EVxCC	2.62		14	2	107	2	No	25	EVxCC	33.5	54
17	5	65	152	25	No	MPxCC	4.15		15	1	108	2	No	25	EVxCC	33.5	43
18	3	66	153	100	No	MPxCC	5.14		16	1	111	2	No	75	EVxCC	33.5	52
18	3	66	154	100	No	MPxCC	3.66		18	1	116	2	No	75	EVxCC	33.5	47
18	4	67	155	75	No	EVxCC	3.75		18	2	117	2	No	0	EVxCC	33.5	44
18	4	67	156	75	No	MPxCC	3.55		18	2	117	2	No	0	EVxCC	33.5	55
19	4	69	161	25	No	EVxCC	5.04		18	2	117	2	No	0	EVxCC	33.5	27.5
19	4	69	162	25	No	MPxCC	3.36		18	2	117	2	No	0	EVxCC	33.5	49.5
21	4	74	171	100	No	MPxCC	4.31		19	1	118	2	No	0	EVxCC	33.5	43
21	4	74	172	100	No	MPxCC	3.92		19	1	118	2	No	0	EVxCC	33.5	49
21	5	75	173	75	No	EVxCC	3.77		19	1	118	2	No	0	EVxCC	33.5	46
21	5	75	174	75	No	MPxCC	2.85		19	3	120	2	No	25	EVxCC	33.5	49
22	3	76	175	0	No	EVxCC	5.34		22	2	127	2	No	25	EVxCC	33.5	67
22	3	76	176	0	No	EVxCC	4.4		23	2	129	2	No	75	EVxCC	33.5	36
22	3	76	177	0	No	EVxCC	2.54		24	2	132	2	No	0	EVxCC	33.5	47
22	3	76	178	0	No	EVxCC	4.13		24	2	132	2	No	0	EVxCC	33.5	46
23	4	79	185	100	No	MPxCC	4.26		24	2	132	2	No	0	EVxCC	33.5	30
23	4	79	186	100	No	MPxCC	4.34		24	2	132	2	No	0	EVxCC	33.5	45
23	5	80	187	25	No	EVxCC	4.69		25	1	133	2	No	25	EVxCC	33.5	37.5
23	5	80	188	25	No	MPxCC	3.77		27	3	141	2	No	75	EVxCC	33.5	26
24	4	82	191	75	No	EVxCC	5.74		28	1	142	2	No	25	EVxCC	33.5	39
24	4	82	192	75	No	MPxCC	3.21		29	3	144	2	No	25	EVxCC	33.5	37
25	5	85	197	100	No	MPxCC	5.74		4	2	10	1	No	75	MPxCC	23.5	0
25	5	85	198	100	No	MPxCC	3.4		6	1	14	1	No	25	MPxCC	23.5	0
26	4	87	201	25	No	EVxCC	4.52		7	2	17	1	No	100	MPxCC	23.5	0
26	4	87	202	25	No	MPxCC	2.56		8	1	19	1	No	75	MPxCC	23.5	0
26	5	88	203	0	No	EVxCC	4.4		8	2	20	1	No	25	MPxCC	23.5	0
26	5	88	204	0	No	EVxCC	3.84		3	4	29	1	No	75	MPxCC	23.5	1
26	5	88	205	0	No	EVxCC	3.79		9	4	44	1	No	25	MPxCC	23.5	0
26	5	88	206	0	No	EVxCC	4.9		11	5	50	1	No	25	MPxCC	23.5	0
27	4	89	207	100	No	MPxCC	6.65		13	5	55	1	No	75	MPxCC	23.5	7
27	4	89	208	100	No	MPxCC	3.32		16	4	62	1	No	75	MPxCC	23.5	0
28	4	92	213	0	No	EVxCC	4.9		19	4	69	1	No	25	MPxCC	23.5	4
28	4	92	214	0	No	EVxCC	5.88		26	4	87	1	No	25	MPxCC	23.5	0.5
28	4	92	215	0	No	EVxCC	5.11		27	4	89	1	No	100	MPxCC	23.5	0.5
28	4	92	216	0	No	EVxCC	6.13		29	5	95	1	No	100	MPxCC	23.5	0.5
									12	2	102	2	No	100	MPxCC	23.5	1
									12	2	102	2	No	100	MPxCC	23.5	4
									13	2	104	2	No	75	MPxCC	23.5	6
									14	2	107	2	No	25	MPxCC	23.5	4
									15	1	108	2	No	25	MPxCC	23.5	6
									16	1	111	2	No	75	MPxCC	23.5	5
									18	1	116	2	No	75	MPxCC	23.5	5
									19	3	120	2	No	25	MPxCC	23.5	2
									22	2	127	2	No	25	MPxCC	23.5	4
									26	1	136	2	No	100	MPxCC	23.5	1
									27	3	141	2	No	75	MPxCC	23.5	0.5
									28	1	142	2	No	25	MPxCC	23.5	0.5
									7	2	17	1	No	100	MPxCC	27.5	7
									1	4	24	1	No	25	MPxCC	27.5	7
									3	4	29	1	No	75	MPxCC	27.5	5
									9	4	44	1	No	25	MPxCC	27.5	3
									13	5	55	1	No	75	MPxCC	27.5	5
									19	4	69	1	No	25	MPxCC	27.5	9
									27	4	89	1	No	100	MPxCC	27.5	8
									29	5	95	1	No	100	MPxCC	27.5	11
									29	5	95	1	No	100	MPxCC	27.5	6
									10	1	96	2	No	75	MPxCC	27.5	8
									12	2	102	2	No	100	MPxCC	27.5	6
									12	2	102	2	No	100	MPxCC	27.5	11
									13	2	104	2	No	75	MPxCC	27.5	13
									14	2	107	2	No	25	MPxCC	27.5	12
									15	1	108	2	No	25	MPxCC	27.5	13
									16	1	111	2	No	75	MPxCC	27.5	13
									18	1	116	2	No	75	MPxCC	27.5	9
									19	3	120	2	No	25	MPxCC	27.5	6
									22	2	127	2	No	25	MPxCC	27.5	11
									23	2	129	2	No	75	MPxCC	27.5	7
									26	1	136	2	No	100	MPxCC	27.5	6
									26	1	136	2	No	100	MPxCC	27.5	3
									27	3	141	2	No	75	MPxCC	27.5	5
									29	3	144	2	No	25	MPxCC	27.5	3
									4	2	10	1	No	75	MPxCC	33.5	11.5
									6	1	14	1	No	25	MPxCC	33.5	14.5
									7	2	17	1	No	100	MPxCC	33.5	22.5
									7	2	17	1	No	100	MPxCC	33.5	11
									8	1	19	1	No	75	MPxCC	33.5	8
									8	2	20	1	No	25	MPxCC	33.5	17
									1	4	24	1	No	25	MPxCC	33.5	19
									3	4	29	1	No	75	MPxCC	33.5	19
									9	4	44	1	No	25	MPxCC	33.5	15
									11	5	50	1	No	25	MPxCC	33.5	9
									13	5	55	1	No	75	MPxCC	33.5	15
									16	4	62	1	No	75	MPxCC	33.5	10
									19	4	69	1	No	25	MPxCC	33.5	23
									21	5	75	1	No	75	MPxCC	33.5	27.5
									26	4	87	1	No	25	MPxCC	33.5	18
									27	4	89	1	No	100	MPxCC	33.5	16
									27	4	89	1	No	100	MPxCC	33.5	21.5
									29	5	95	1	No	100	MPxCC	33.5	24
									29	5	95	1	No	100	MPxCC	33.5	16
									10	1	96	2	No	75	MPxCC	33.5	27.5
									12	2	102	2	No	100	MPxCC	33.5	34
									12	2	102	2	No	100	MPxCC	33.5	35
									13	2	104	2	No	75	MPxCC	33.5	35.5
									14	2	107	2	No	25	MPxCC	33.5	43
									15	1	108	2	No	25	MPxCC	33.5	33.5
									16	1	111	2	No	75	MPxCC	33.5	37
									18	1	116	2	No	75	MPxCC	33.5	11
									19	3	120	2	No	25	MPxCC	33.5	40
									22	2	127	2	No	25	MPxCC	33.5	46
									23	2	129	2	No	75	MPxCC	33.5	41
									25	1	133	2	No	25	MPxCC	33.5	27
									26	1	136	2	No	100	MPxCC	33.5	25
									26	1	136	2	No	100	MPxCC	33.5	26
									27	3	141	2	No	75	MPxCC	33.5	27
									28	1	142	2	No	25	MPxCC	33.5	28
									29	3	144	2	No	25	MPxCC	33.5	23
[truncated: 26 more columns]
