# Supplementary material for: Determining the scale at which variation in a single gene changes population yields
Source: eLife. 2020 Feb 14;9:e53517. doi: 10.7554/eLife.53517 (PMC7136025; doi:10.7554/eLife.53517)
Supplement: Figure 4—source data 1. [file elife-53517-fig4-data1.xlsx]

## Sheet: Feuil1
Figure 4B					Figure 4C + 4G						Figure 4D + 4H					Figure 4E + 4I						Figure 4F + 4J
Potting	Day post potting	N	Mean Water in Pot (g)		Potting	Replicate	Genotype	Day post potting	Rosette Diameter (cm)		Potting	Replicate	Genotype	Dry Shoot Biomass (mg)		Genotype	Potting	Wet Shoot Mass (mg)	Dry Shoot Mass (mg)	Water Content (mg)		Genotype	Potting	Replicate	Total Fitness Correlates (#)
EV Single	29	11	11.1673		Single	1	EV	3	3		Single	1	EV	5.428		EV	Single	5.692	5.428	0.264		EV	Single	1	10
EV Single	30	11	32.28		Single	2	EV	3	3		Single	2	EV	5.349		EV	Single	5.641	5.349	0.292		EV	Single	2	7
EV Single	31	11	17.04		Single	3	EV	3	3.5		Single	4	EV	5.554		EV	Single	5.872	5.554	0.318		EV	Single	4	11
EV Single	32	11	27.8418		Single	4	EV	3	4		Single	5	EV	5.49		EV	Single	5.813	5.49	0.323		EV	Single	5	11
EV Single	33	11	10.1891		Single	5	EV	3	3.5		Single	6	EV	5.595		EV	Single	5.957	5.595	0.362		EV	Single	6	12
EV Single	34	11	31.0273		Single	6	EV	3	3.5		Single	7	EV	5.549		EV	Single	5.892	5.549	0.343		EV	Single	7	13
EV Single	35	11	15.6891		Single	7	EV	3	3.5		Single	8	EV	5.406		EV	Single	5.621	5.406	0.215		EV	Single	8	8
EV Single	36	11	35.6673		Single	8	EV	3	3.5		Single	9	EV	5.569		EV	Single	5.82	5.569	0.251		EV	Single	9	11
EV Single	37	11	18.3418		Single	9	EV	3	3		Single	10	EV	5.482		EV	Single	5.813	5.482	0.331		EV	Single	10	8
EV Single	38	11	31.9145		Single	10	EV	3	4		Single	11	EV	5.326		EV	Mono	5.612	5.402	0.21		EV	Single	11	9
EV Single	39	11	14.2127		Single	11	EV	3	3		Single	12	EV	5.51		EV	Mono	5.599	5.376	0.223		EV	Single	12	16
EV Single	40	11	36.2091		Single	12	EV	3	4		Mono	1	EV	5.402		EV	Mono	5.606	5.385	0.221		EV	Mono	1	3
EV Single	41	11	17.9055		Mono	1	EV	3	3.5		Mono	1	EV	5.376		EV	Mono	5.702	5.499	0.203		EV	Mono	1	5
EV Single	42	11	35.9473		Mono	2	EV	3	2		Mono	3	EV	5.385		EV	Mono	5.626	5.382	0.244		EV	Mono	3	3
EV Single	43	11	16.5345		Mono	3	EV	3	3.5		Mono	3	EV	5.499		EV	Mono	5.603	5.314	0.289		EV	Mono	3	6
EV Single	44	11	36.8945		Mono	4	EV	3	4		Mono	4	EV	5.382		EV	Mono	5.652	5.416	0.236		EV	Mono	4	6
EV Single	45	11	16.1655		Mono	5	EV	3	3.5		Mono	4	EV	5.314		EV	Mono	5.745	5.516	0.229		EV	Mono	4	10
EV Single	47	11	3.51818		Mono	6	EV	3	3.5		Mono	5	EV	5.416		EV	Mono	5.693	5.451	0.242		EV	Mono	5	6
EV Single	49	11	-5.47455		Mono	7	EV	3	2		Mono	5	EV	5.516		EV	Mono	5.589	5.325	0.264		EV	Mono	5	9
EV Single	51	11	22.6873		Mono	8	EV	3	3		Mono	6	EV	5.451		EV	Mono	5.591	5.351	0.24		EV	Mono	6	7
EV Single	52	11	43.4909		Mono	9	EV	3	3.5		Mono	6	EV	5.325		EV	Mono	5.587	5.332	0.255		EV	Mono	6	6
EV Single	53	11	19.6727		Mono	10	EV	3	3.5		Mono	7	EV	5.351		EV	Mono	5.841	5.485	0.356		EV	Mono	7	6
EV Single	54	11	35.6182		Mono	11	EV	3	4		Mono	7	EV	5.332		EV	Mono	5.606	5.38	0.226		EV	Mono	7	8
EV Single	55	11	15.2345		Mono	12	EV	3	4		Mono	8	EV	5.485		EV	Mono	5.881	5.498	0.383		EV	Mono	8	6
EV Single	56	11	41.5436		Mono	1	EV	3	3		Mono	8	EV	5.38		EV	Mono	5.677	5.408	0.269		EV	Mono	9	10
EV Single	57	11	18.3509		Mono	2	EV	3	1		Mono	9	EV	5.498		EV	Mono	5.762	5.508	0.254		EV	Mono	9	9
EV Single	58	11	35.8018		Mono	3	EV	3	3		Mono	9	EV	5.408		EV	Mono	5.643	5.405	0.238		EV	Mono	10	10
EV Single	59	11	14.1509		Mono	4	EV	3	3		Mono	10	EV	5.508		EV	Mono	5.826	5.503	0.323		EV	Mono	10	6
0% irMPK4	29	11	15.7218		Mono	5	EV	3	3.5		Mono	10	EV	5.405		EV	Mono	5.559	5.339	0.22		EV	Mono	11	11
0% irMPK4	30	11	41.7473		Mono	6	EV	3	3		Mono	11	EV	5.503		EV	Mono	5.663	5.407	0.256		EV	Mono	11	8
0% irMPK4	31	11	20.8018		Mono	7	EV	3	2		Mono	11	EV	5.339		EV	Mono	5.632	5.386	0.246		EV	Mono	12	8
0% irMPK4	32	11	37.28		Mono	8	EV	3	3.5		Mono	12	EV	5.407		EV	Mix	5.637	5.348	0.289		EV	Mono	12	10
0% irMPK4	33	11	16.1691		Mono	9	EV	3	4		Mono	12	EV	5.386		EV	Mix	5.529	5.318	0.211		EV	Mix	1	6
0% irMPK4	34	11	42.4145		Mono	10	EV	3	2.5		Mix	1	EV	5.348		EV	Mix	5.633	5.356	0.277		EV	Mix	2	3
0% irMPK4	35	11	22.6564		Mono	11	EV	3	3.5		Mix	2	EV	5.318		EV	Mix	5.728	5.452	0.276		EV	Mix	3	8
0% irMPK4	36	11	42.8564		Mono	12	EV	3	4		Mix	3	EV	5.356		EV	Mix	5.806	5.498	0.308		EV	Mix	4	7
0% irMPK4	37	11	21.52		Mix	1	EV	3	3		Mix	4	EV	5.452		EV	Mix	6.076	5.712	0.364		EV	Mix	5	9
0% irMPK4	38	11	39.9109		Mix	2	EV	3	3		Mix	5	EV	5.498		EV	Mix	5.644	5.377	0.267		EV	Mix	6	13
0% irMPK4	39	11	17.4327		Mix	3	EV	3	3		Mix	8	EV	5.377		EV	Mix	5.549	5.316	0.233		EV	Mix	8	2
0% irMPK4	40	11	43.9455		Mix	4	EV	3	3		Mix	9	EV	5.316		EV	Mix	5.629	5.441	0.188		EV	Mix	9	3
0% irMPK4	41	11	18.2873		Mix	5	EV	3	4		Mix	10	EV	5.441		EV	Mix	5.58	5.332	0.248		EV	Mix	10	10
0% irMPK4	42	11	45.1073		Mix	6	EV	3	5		Mix	11	EV	5.332		EV	Mix	5.511	5.279	0.232		EV	Mix	11	7
0% irMPK4	43	11	21.6564		Mix	7	EV	3	2		Mix	12	EV	5.279		irMPK4	Single	5.63	5.44	0.19		EV	Mix	12	10
0% irMPK4	44	11	51.8218		Mix	8	EV	3	3		Single	2	irMPK4	5.425		irMPK4	Single	5.693	5.498	0.195		irMPK4	Single	2	6
0% irMPK4	45	11	24.6145		Mix	9	EV	3	2		Single	3	irMPK4	5.44		irMPK4	Single	5.627	5.435	0.192		irMPK4	Single	3	9
0% irMPK4	47	11	8.27091		Mix	10	EV	3	3		Single	4	irMPK4	5.498		irMPK4	Single	5.787	5.557	0.23		irMPK4	Single	4	8
0% irMPK4	49	10	-2.616		Mix	11	EV	3	3		Single	5	irMPK4	5.435		irMPK4	Single	5.606	5.429	0.177		irMPK4	Single	5	5
0% irMPK4	51	10	41.888		Mix	12	EV	3	3		Single	6	irMPK4	5.557		irMPK4	Single	5.642	5.448	0.194		irMPK4	Single	6	10
0% irMPK4	52	10	70.138		Single	1	EV	9	4.5		Single	7	irMPK4	5.429		irMPK4	Single	5.695	5.446	0.249		irMPK4	Single	7	7
0% irMPK4	53	10	35.338		Single	2	EV	9	3.5		Single	8	irMPK4	5.448		irMPK4	Single	5.627	5.384	0.243		irMPK4	Single	8	4
0% irMPK4	54	10	54.184		Single	3	EV	9	4		Single	9	irMPK4	5.446		irMPK4	Single	5.669	5.472	0.197		irMPK4	Single	9	9
0% irMPK4	55	10	25.372		Single	4	EV	9	4.5		Single	10	irMPK4	5.384		irMPK4	Single	5.702	5.463	0.239		irMPK4	Single	10	3
0% irMPK4	56	10	66.524		Single	5	EV	9	4.5		Single	11	irMPK4	5.472		irMPK4	Mono	5.524	5.314	0.21		irMPK4	Single	11	6
0% irMPK4	57	10	34.392		Single	6	EV	9	4.5		Single	12	irMPK4	5.463		irMPK4	Mono	5.68	5.451	0.229		irMPK4	Single	12	8
0% irMPK4	58	10	54.73		Single	7	EV	9	4.5		Mono	1	irMPK4	5.314		irMPK4	Mono	5.608	5.453	0.155		irMPK4	Mono	1	3
0% irMPK4	59	10	24.32		Single	8	EV	9	4		Mono	1	irMPK4	5.451		irMPK4	Mono	5.474	5.291	0.183		irMPK4	Mono	1	9
50% irMPK4	29	11	14.3618		Single	9	EV	9	4		Mono	2	irMPK4	5.453		irMPK4	Mono	5.602	5.372	0.23		irMPK4	Mono	2	2
50% irMPK4	30	11	49.4527		Single	10	EV	9	4.5		Mono	2	irMPK4	5.291		irMPK4	Mono	5.673	5.405	0.268		irMPK4	Mono	2	1
50% irMPK4	31	11	24.2109		Single	11	EV	9	5		Mono	3	irMPK4	5.372		irMPK4	Mono	5.696	5.415	0.281		irMPK4	Mono	3	8
50% irMPK4	32	11	48.9418		Single	12	EV	9	5		Mono	3	irMPK4	5.405		irMPK4	Mono	5.685	5.466	0.219		irMPK4	Mono	3	9
50% irMPK4	33	11	22.3164		Mono	1	EV	9	4.5		Mono	4	irMPK4	5.415		irMPK4	Mono	5.769	5.541	0.228		irMPK4	Mono	4	8
50% irMPK4	34	11	51.0218		Mono	2	EV	9	3.5		Mono	4	irMPK4	5.466		irMPK4	Mono	5.7	5.474	0.226		irMPK4	Mono	4	7
50% irMPK4	35	11	25.56		Mono	3	EV	9	5		Mono	5	irMPK4	5.541		irMPK4	Mono	5.762	5.535	0.227		irMPK4	Mono	5	8
50% irMPK4	36	11	53.4655		Mono	4	EV	9	4.5		Mono	5	irMPK4	5.474		irMPK4	Mono	5.705	5.481	0.224		irMPK4	Mono	5	7
50% irMPK4	37	11	26.6691		Mono	5	EV	9	5		Mono	6	irMPK4	5.535		irMPK4	Mono	5.767	5.537	0.23		irMPK4	Mono	6	6
50% irMPK4	38	11	51.54		Mono	6	EV	9	5		Mono	6	irMPK4	5.481		irMPK4	Mono	5.768	5.525	0.243		irMPK4	Mono	6	10
50% irMPK4	39	11	22.4691		Mono	7	EV	9	3.5		Mono	7	irMPK4	5.537		irMPK4	Mono	5.679	5.492	0.187		irMPK4	Mono	7	7
50% irMPK4	40	11	54.3327		Mono	8	EV	9	5		Mono	7	irMPK4	5.525		irMPK4	Mono	5.64	5.446	0.194		irMPK4	Mono	7	13
50% irMPK4	41	11	21.1782		Mono	9	EV	9	4.5		Mono	9	irMPK4	5.492		irMPK4	Mono	5.707	5.525	0.182		irMPK4	Mono	9	5
50% irMPK4	42	11	58.3109		Mono	10	EV	9	4.5		Mono	9	irMPK4	5.446		irMPK4	Mono	5.607	5.442	0.165		irMPK4	Mono	9	5
50% irMPK4	43	11	30.9327		Mono	11	EV	9	6		Mono	10	irMPK4	5.525		irMPK4	Mono	5.631	5.399	0.232		irMPK4	Mono	10	8
50% irMPK4	44	11	66.2964		Mono	12	EV	9	5		Mono	10	irMPK4	5.442		irMPK4	Mono	5.685	5.441	0.244		irMPK4	Mono	10	8
50% irMPK4	45	11	25.6818		Mono	1	EV	9	3.5		Mono	11	irMPK4	5.399		irMPK4	Mono	5.753	5.524	0.229		irMPK4	Mono	11	6
50% irMPK4	47	11	3.59818		Mono	2	EV	9	2		Mono	11	irMPK4	5.441		irMPK4	Mono	5.491	5.2	0.291		irMPK4	Mono	11	4
50% irMPK4	49	10	-10.356		Mono	3	EV	9	3.5		Mono	12	irMPK4	5.524		irMPK4	Mix	5.752	5.564	0.188		irMPK4	Mono	12	5
50% irMPK4	51	10	44.832		Mono	4	EV	9	4		Mix	1	irMPK4	5.433		irMPK4	Mix	5.651	5.392	0.259		irMPK4	Mono	12	10
50% irMPK4	52	10	78.778		Mono	5	EV	9	5		Mix	2	irMPK4	5.564		irMPK4	Mix	5.739	5.541	0.198		irMPK4	Mix	1	4
50% irMPK4	53	10	34.14		Mono	6	EV	9	4		Mix	3	irMPK4	5.392		irMPK4	Mix	5.734	5.478	0.256		irMPK4	Mix	2	7
50% irMPK4	54	10	57.602		Mono	7	EV	9	3		Mix	4	irMPK4	5.541		irMPK4	Mix	5.557	5.37	0.187		irMPK4	Mix	3	5
50% irMPK4	55	10	21.7		Mono	8	EV	9	4		Mix	5	irMPK4	5.478		irMPK4	Mix	5.756	5.593	0.163		irMPK4	Mix	4	5
50% irMPK4	56	10	78.776		Mono	9	EV	9	4.5		Mix	6	irMPK4	5.37		irMPK4	Mix	5.632	5.423	0.209		irMPK4	Mix	5	8
50% irMPK4	57	10	36.248		Mono	10	EV	9	3		Mix	8	irMPK4	5.609		irMPK4	Mix	5.567	5.341	0.226		irMPK4	Mix	6	6
50% irMPK4	58	10	62.014		Mono	11	EV	9	4		Mix	9	irMPK4	5.591								irMPK4	Mix	10	8
50% irMPK4	59	10	21.106		Mono	12	EV	9	6		Mix	10	irMPK4	5.593								irMPK4	Mix	11	6
irMPK4 Single	29	11	12.4473		Mix	1	EV	9	4		Mix	11	irMPK4	5.423								irMPK4	Mix	12	6
irMPK4 Single	30	11	38.7927		Mix	2	EV	9	4		Mix	12	irMPK4	5.341
irMPK4 Single	31	11	19.8709		Mix	3	EV	9	4
irMPK4 Single	32	11	34.7091		Mix	4	EV	9	4.5
irMPK4 Single	33	11	14.2873		Mix	5	EV	9	5
irMPK4 Single	34	11	38.5309		Mix	6	EV	9	5.5
irMPK4 Single	35	11	19.8764		Mix	7	EV	9	2.5
irMPK4 Single	36	11	41.4182		Mix	8	EV	9	3
irMPK4 Single	37	11	20.4127		Mix	9	EV	9	3.5
irMPK4 Single	38	11	37.7618		Mix	10	EV	9	5
irMPK4 Single	39	11	15.9927		Mix	11	EV	9	4
irMPK4 Single	40	11	42.2291		Mix	12	EV	9	4.5
irMPK4 Single	41	11	19.1436		Single	1	EV	17	6
irMPK4 Single	42	11	43.88		Single	2	EV	17	4
irMPK4 Single	43	11	19.0291		Single	3	EV	17	5.5
irMPK4 Single	44	11	46.4109		Single	4	EV	17	6.5
irMPK4 Single	45	11	18.4055		Single	5	EV	17	5.5
irMPK4 Single	47	11	2.58182		Single	6	EV	17	6
irMPK4 Single	49	10	-5.692		Single	7	EV	17	5.5
irMPK4 Single	51	10	32.376		Single	8	EV	17	5.5
irMPK4 Single	52	10	56.63		Single	9	EV	17	5.5
irMPK4 Single	53	10	26.286		Single	10	EV	17	5.5
irMPK4 Single	54	10	43.54		Single	11	EV	17	6
irMPK4 Single	55	10	17.472		Single	12	EV	17	6
irMPK4 Single	56	10	53.654		Mono	1	EV	17	6
irMPK4 Single	57	10	24.512		Mono	2	EV	17	5
irMPK4 Single	58	10	47.066		Mono	3	EV	17	6
irMPK4 Single	59	10	18.356		Mono	4	EV	17	7
100% irMPK4	29	10	16.928		Mono	5	EV	17	6
100% irMPK4	30	10	55.544		Mono	6	EV	17	7
100% irMPK4	31	10	27.138		Mono	7	EV	17	5
100% irMPK4	32	10	58.884		Mono	8	EV	17	6.5
100% irMPK4	33	10	24.874		Mono	9	EV	17	6
100% irMPK4	34	10	58.47		Mono	10	EV	17	6
100% irMPK4	35	10	28.546		Mono	11	EV	17	8
100% irMPK4	36	10	69.11		Mono	12	EV	17	6
100% irMPK4	37	10	35.587		Mono	1	EV	17	5.5
100% irMPK4	38	10	60.424		Mono	2	EV	17	3.5
100% irMPK4	39	10	23.922		Mono	3	EV	17	6.5
100% irMPK4	40	10	67.872		Mono	4	EV	17	5.5
100% irMPK4	41	10	32.308		Mono	5	EV	17	6
100% irMPK4	42	10	73.31		Mono	6	EV	17	6
100% irMPK4	43	10	34.576		Mono	7	EV	17	5
100% irMPK4	44	10	71.596		Mono	8	EV	17	4.5
100% irMPK4	45	10	29.052		Mono	9	EV	17	6.5
100% irMPK4	47	10	4.788		Mono	10	EV	17	4
100% irMPK4	49	9	-7.61111		Mono	11	EV	17	6
100% irMPK4	51	9	53.6422		Mono	12	EV	17	7
100% irMPK4	52	9	88.4822		Mix	1	EV	17	4.5
100% irMPK4	53	9	38.0044		Mix	2	EV	17	5
100% irMPK4	54	9	63.0067		Mix	3	EV	17	5.5
100% irMPK4	55	9	17.5978		Mix	4	EV	17	6
100% irMPK4	56	9	76.3144		Mix	5	EV	17	5
100% irMPK4	57	9	35.1956		Mix	6	EV	17	7
100% irMPK4	58	9	76.32		Mix	7	EV	17	3
100% irMPK4	59	9	28.3378		Mix	8	EV	17	4
					Mix	9	EV	17	5
					Mix	10	EV	17	6.5
					Mix	11	EV	17	5
					Mix	12	EV	17	6
					Single	1	EV	23	5.5
					Single	2	EV	23	5
					Single	3	EV	23	7
					Single	4	EV	23	7
					Single	5	EV	23	7
					Single	6	EV	23	6
					Single	7	EV	23	6.5
					Single	8	EV	23	5.5
					Single	9	EV	23	5.5
					Single	10	EV	23	6
					Single	11	EV	23	7
					Single	12	EV	23	6.5
					Mono	1	EV	23	6.5
					Mono	2	EV	23	5.5
					Mono	3	EV	23	6.5
					Mono	4	EV	23	7
					Mono	5	EV	23	7
					Mono	6	EV	23	7
					Mono	7	EV	23	5.5
					Mono	8	EV	23	8
					Mono	9	EV	23	6.5
					Mono	10	EV	23	6.5
					Mono	11	EV	23	8
					Mono	12	EV	23	6
					Mono	1	EV	23	5.5
					Mono	2	EV	23	4
					Mono	3	EV	23	6.5
					Mono	4	EV	23	6
					Mono	5	EV	23	7
					Mono	6	EV	23	6.5
					Mono	7	EV	23	5.5
					Mono	8	EV	23	5.5
					Mono	9	EV	23	6.5
					Mono	10	EV	23	5.5
					Mono	11	EV	23	6.5
					Mono	12	EV	23	7.5
					Mix	1	EV	23	5.5
					Mix	2	EV	23	5
					Mix	3	EV	23	6.5
					Mix	4	EV	23	7
					Mix	5	EV	23	6.5
					Mix	6	EV	23	8
					Mix	8	EV	23	5
					Mix	9	EV	23	5
					Mix	10	EV	23	8
					Mix	11	EV	23	5
					Mix	12	EV	23	7
					Single	1	EV	29	7
					Single	2	EV	29	6
					Single	3	EV	29	8
					Single	4	EV	29	9
					Single	5	EV	29	7.5
					Single	6	EV	29	8.5
					Single	7	EV	29	7
					Single	8	EV	29	7
					Single	9	EV	29	7.5
					Single	10	EV	29	7
					Single	11	EV	29	8.5
					Single	12	EV	29	8.5
					Mono	1	EV	29	6.5
					Mono	2	EV	29	6.5
					Mono	3	EV	29	7.5
					Mono	4	EV	29	7.5
					Mono	5	EV	29	7.5
					Mono	6	EV	29	7
					Mono	7	EV	29	6.5
					Mono	8	EV	29	9
					Mono	9	EV	29	7.5
					Mono	10	EV	29	8
					Mono	11	EV	29	10
					Mono	12	EV	29	8
					Mono	1	EV	29	6
					Mono	2	EV	29	5
					Mono	3	EV	29	7.5
					Mono	4	EV	29	6.5
					Mono	5	EV	29	8
					Mono	6	EV	29	7.5
					Mono	7	EV	29	6.5
					Mono	8	EV	29	6
					Mono	9	EV	29	7.5
					Mono	10	EV	29	7
					Mono	11	EV	29	8
					Mono	12	EV	29	8
					Mix	1	EV	29	6
					Mix	2	EV	29	6
					Mix	3	EV	29	8
					Mix	4	EV	29	9
					Mix	5	EV	29	8
					Mix	6	EV	29	9.5
					Mix	7	EV	29	5
					Mix	8	EV	29	7
					Mix	9	EV	29	6.5
					Mix	10	EV	29	9
					Mix	11	EV	29	6.5
					Mix	12	EV	29	9
					Single	1	EV	35	10
					Single	2	EV	35	7
					Single	3	EV	35	8
					Single	4	EV	35	9
					Single	5	EV	35	10
					Single	6	EV	35	9
					Single	7	EV	35	9
					Single	8	EV	35	9
					Single	9	EV	35	9
					Single	10	EV	35	9
					Single	11	EV	35	10
					Single	12	EV	35	10
					Mono	1	EV	35	7
					Mono	2	EV	35	7
					Mono	3	EV	35	8.5
					Mono	4	EV	35	8
					Mono	5	EV	35	8.5
					Mono	6	EV	35	8.5
					Mono	7	EV	35	7
					Mono	8	EV	35	10
					Mono	9	EV	35	9
					Mono	10	EV	35	8.5
					Mono	11	EV	35	11
					Mono	12	EV	35	9
					Mono	1	EV	35	7
					Mono	2	EV	35	6
					Mono	3	EV	35	8
					Mono	4	EV	35	8
					Mono	5	EV	35	8.5
					Mono	6	EV	35	7.5
					Mono	7	EV	35	7.5
					Mono	8	EV	35	6
					Mono	9	EV	35	7.5
					Mono	10	EV	35	6
					Mono	11	EV	35	9
					Mono	12	EV	35	9
					Mix	1	EV	35	7.5
					Mix	2	EV	35	7
					Mix	3	EV	35	9
					Mix	4	EV	35	9
					Mix	5	EV	35	9
					Mix	6	EV	35	10
					Mix	7	EV	35	6
					Mix	8	EV	35	8
					Mix	9	EV	35	7
					Mix	10	EV	35	10
					Mix	11	EV	35	7
					Mix	12	EV	35	10
					Single	1	EV	41	11.4
					Single	2	EV	41	9.6
					Single	3	EV	41	9
					Single	4	EV	41	10.8
					Single	5	EV	41	11.6
					Single	6	EV	41	12.2
					Single	7	EV	41	11
					Single	8	EV	41	10.2
					Single	9	EV	41	10.6
					Single	10	EV	41	10.2
					Single	11	EV	41	10.8
					Single	12	EV	41	11.2
					Mono	1	EV	41	9.5
					Mono	2	EV	41	9.2
					Mono	3	EV	41	9.2
					Mono	4	EV	41	9.4
					Mono	5	EV	41	10.4
					Mono	6	EV	41	9.8
					Mono	7	EV	41	9
					Mono	8	EV	41	10
					Mono	9	EV	41	10.6
					Mono	10	EV	41	9.4
					Mono	11	EV	41	11.4
					Mono	12	EV	41	9.6
					Mono	1	EV	41	8.6
					Mono	2	EV	41	7.8
					Mono	3	EV	41	9.4
					Mono	4	EV	41	9.6
					Mono	5	EV	41	9.8
					Mono	6	EV	41	9
					Mono	7	EV	41	9.2
					Mono	8	EV	41	8.4
					Mono	9	EV	41	9.6
					Mono	10	EV	41	8.8
					Mono	11	EV	41	10
					Mono	12	EV	41	10
					Mix	1	EV	41	9
					Mix	2	EV	41	8.6
					Mix	3	EV	41	10.4
					Mix	4	EV	41	11
					Mix	5	EV	41	10.6
					Mix	6	EV	41	11.2
					Mix	7	EV	41	7.8
					Mix	8	EV	41	8.4
					Mix	9	EV	41	8.2
					Mix	10	EV	41	12
					Mix	11	EV	41	8.6
					Mix	12	EV	41	10
					Single	1	EV	47	11.5
					Single	2	EV	47	10
					Single	3	EV	47	10
					Single	4	EV	47	10.5
					Single	5	EV	47	10.5
					Single	6	EV	47	12
					Single	7	EV	47	10
					Single	8	EV	47	10
					Single	9	EV	47	10
					Single	10	EV	47	9.4
					Single	11	EV	47	11
					Single	12	EV	47	11
					Mono	1	EV	47	9
					Mono	2	EV	47	9
					Mono	3	EV	47	9
					Mono	4	EV	47	8
					Mono	5	EV	47	9.5
					Mono	6	EV	47	9
					Mono	7	EV	47	9
					Mono	8	EV	47	9.5
					Mono	9	EV	47	10
					Mono	10	EV	47	9
					Mono	11	EV	47	11.5
					Mono	12	EV	47	9
					Mono	1	EV	47	8
					Mono	2	EV	47	7.5
					Mono	3	EV	47	9
					Mono	4	EV	47	9
					Mono	5	EV	47	9.5
					Mono	6	EV	47	9
					Mono	7	EV	47	9
					Mono	8	EV	47	7.5
					Mono	9	EV	47	8.5
					Mono	10	EV	47	8
					Mono	11	EV	47	9
					Mono	12	EV	47	9
					Mix	1	EV	47	8
					Mix	2	EV	47	8
					Mix	3	EV	47	9
					Mix	4	EV	47	10
					Mix	5	EV	47	9.5
					Mix	6	EV	47	10
					Mix	7	EV	47	7
					Mix	8	EV	47	8
					Mix	9	EV	47	8
					Mix	10	EV	47	10
					Mix	11	EV	47	8
					Mix	12	EV	47	9.5
					Single	1	EV	53	11.2
					Single	2	EV	53	10.4
					Single	4	EV	53	11
					Single	5	EV	53	10
					Single	6	EV	53	12
					Single	7	EV	53	10
					Single	8	EV	53	10.8
					Single	9	EV	53	11
					Single	10	EV	53	9.4
					Single	11	EV	53	10.5
					Single	12	EV	53	10.6
					Mono	1	EV	53	9
					Mono	3	EV	53	10
					Mono	4	EV	53	8
					Mono	5	EV	53	10
					Mono	6	EV	53	9
					Mono	7	EV	53	10
					Mono	8	EV	53	9
					Mono	9	EV	53	10.5
					Mono	10	EV	53	9.5
					Mono	11	EV	53	11
					Mono	12	EV	53	8.5
					Mono	1	EV	53	8
					Mono	3	EV	53	8.5
					Mono	4	EV	53	8.5
					Mono	5	EV	53	9.5
					Mono	6	EV	53	10
					Mono	7	EV	53	10
					Mono	8	EV	53	7.5
					Mono	9	EV	53	9
					Mono	10	EV	53	8
					Mono	11	EV	53	9
					Mono	12	EV	53	9
					Mix	1	EV	53	9
					Mix	2	EV	53	9.5
					Mix	3	EV	53	11
					Mix	4	EV	53	11
					Mix	5	EV	53	10
					Mix	6	EV	53	10.5
					Mix	8	EV	53	8.5
					Mix	9	EV	53	8
					Mix	10	EV	53	11
					Mix	11	EV	53	9
					Mix	12	EV	53	10
					Single	1	irMPK4	3	4
					Single	2	irMPK4	3	5
					Single	3	irMPK4	3	4
					Single	4	irMPK4	3	4
					Single	5	irMPK4	3	4
					Single	6	irMPK4	3	4.5
					Single	7	irMPK4	3	4
					Single	8	irMPK4	3	3.5
					Single	9	irMPK4	3	3.5
					Single	10	irMPK4	3	4
					Single	11	irMPK4	3	4
					Single	12	irMPK4	3	4
					Mono	1	irMPK4	3	3.5
					Mono	2	irMPK4	3	3.5
					Mono	3	irMPK4	3	4
					Mono	4	irMPK4	3	4.5
					Mono	5	irMPK4	3	4
					Mono	6	irMPK4	3	4.5
					Mono	7	irMPK4	3	4
					Mono	8	irMPK4	3	4
					Mono	9	irMPK4	3	4.5
					Mono	10	irMPK4	3	3.5
					Mono	11	irMPK4	3	3
					Mono	12	irMPK4	3	3
					Mono	1	irMPK4	3	4
					Mono	2	irMPK4	3	3.5
					Mono	3	irMPK4	3	4.5
					Mono	4	irMPK4	3	3.5
					Mono	5	irMPK4	3	4
					Mono	6	irMPK4	3	4
					Mono	7	irMPK4	3	4.5
					Mono	8	irMPK4	3	3
					Mono	9	irMPK4	3	4
					Mono	10	irMPK4	3	4.5
					Mono	11	irMPK4	3	3
					Mono	12	irMPK4	3	3.5
					Mix	1	irMPK4	3	4
					Mix	2	irMPK4	3	4
					Mix	3	irMPK4	3	3
					Mix	4	irMPK4	3	4
					Mix	5	irMPK4	3	4
					Mix	6	irMPK4	3	3
					Mix	7	irMPK4	3	4
					Mix	8	irMPK4	3	4
					Mix	9	irMPK4	3	4
					Mix	10	irMPK4	3	5
					Mix	11	irMPK4	3	4
					Mix	12	irMPK4	3	3.5
					Single	1	irMPK4	9	5
					Single	2	irMPK4	9	5.5
					Single	3	irMPK4	9	5
					Single	4	irMPK4	9	4.5
					Single	5	irMPK4	9	5
					Single	6	irMPK4	9	5.5
					Single	7	irMPK4	9	4
					Single	8	irMPK4	9	4
					Single	9	irMPK4	9	4
					Single	10	irMPK4	9	5.5
					Single	11	irMPK4	9	5
					Single	12	irMPK4	9	5
					Mono	1	irMPK4	9	4
					Mono	2	irMPK4	9	5
					Mono	3	irMPK4	9	5
					Mono	4	irMPK4	9	5
					Mono	5	irMPK4	9	5
					Mono	6	irMPK4	9	6
					Mono	7	irMPK4	9	5
					Mono	8	irMPK4	9	5
					Mono	9	irMPK4	9	5
					Mono	10	irMPK4	9	5
					Mono	11	irMPK4	9	4
					Mono	12	irMPK4	9	4.5
					Mono	1	irMPK4	9	5
					Mono	2	irMPK4	9	4
					Mono	3	irMPK4	9	5
					Mono	4	irMPK4	9	4
					Mono	5	irMPK4	9	5
					Mono	6	irMPK4	9	4.5
					Mono	7	irMPK4	9	5
					Mono	8	irMPK4	9	4.5
					Mono	9	irMPK4	9	4.5
					Mono	10	irMPK4	9	4.5
					Mono	11	irMPK4	9	4
					Mono	12	irMPK4	9	4
					Mix	1	irMPK4	9	4.5
					Mix	2	irMPK4	9	5
					Mix	3	irMPK4	9	4
					Mix	4	irMPK4	9	5.5
					Mix	5	irMPK4	9	5
					Mix	6	irMPK4	9	4
					Mix	7	irMPK4	9	4.5
					Mix	8	irMPK4	9	5.5
					Mix	9	irMPK4	9	5.5
					Mix	10	irMPK4	9	5.5
					Mix	11	irMPK4	9	4.5
					Mix	12	irMPK4	9	4
					Single	1	irMPK4	17	6
					Single	2	irMPK4	17	6
					Single	3	irMPK4	17	6
					Single	4	irMPK4	17	5.5
					Single	5	irMPK4	17	6
					Single	6	irMPK4	17	6.5
					Single	7	irMPK4	17	5
					Single	8	irMPK4	17	5.5
					Single	9	irMPK4	17	5
					Single	10	irMPK4	17	5.5
					Single	11	irMPK4	17	5
					Single	12	irMPK4	17	6
					Mono	1	irMPK4	17	6.5
					Mono	2	irMPK4	17	7
					Mono	3	irMPK4	17	7
					Mono	4	irMPK4	17	7
					Mono	5	irMPK4	17	8
					Mono	6	irMPK4	17	6.5
					Mono	7	irMPK4	17	7
					Mono	8	irMPK4	17	6
					Mono	9	irMPK4	17	6.5
					Mono	10	irMPK4	17	6.5
					Mono	11	irMPK4	17	5
					Mono	12	irMPK4	17	5
					Mono	1	irMPK4	17	7.5
					Mono	2	irMPK4	17	6.5
					Mono	3	irMPK4	17	8
					Mono	4	irMPK4	17	6.5
					Mono	5	irMPK4	17	7
					Mono	6	irMPK4	17	5.5
					Mono	7	irMPK4	17	6.5
					Mono	8	irMPK4	17	6
					Mono	9	irMPK4	17	6
					Mono	10	irMPK4	17	6.5
					Mono	11	irMPK4	17	5.5
					Mono	12	irMPK4	17	5
					Mix	1	irMPK4	17	5
					Mix	2	irMPK4	17	6
					Mix	3	irMPK4	17	5
					Mix	4	irMPK4	17	7
					Mix	5	irMPK4	17	6
					Mix	6	irMPK4	17	5
					Mix	7	irMPK4	17	6
					Mix	8	irMPK4	17	7
					Mix	9	irMPK4	17	6
					Mix	10	irMPK4	17	7
					Mix	11	irMPK4	17	6
					Mix	12	irMPK4	17	5.5
					Single	1	irMPK4	23	7.5
					Single	2	irMPK4	23	6
					Single	3	irMPK4	23	7
					Single	4	irMPK4	23	5.5
					Single	5	irMPK4	23	6
					Single	6	irMPK4	23	6.5
					Single	7	irMPK4	23	6
					Single	8	irMPK4	23	6
					Single	9	irMPK4	23	5
					Single	10	irMPK4	23	6
					Single	11	irMPK4	23	6.5
					Single	12	irMPK4	23	6
					Mono	1	irMPK4	23	6.5
					Mono	2	irMPK4	23	8
					Mono	3	irMPK4	23	7
					Mono	4	irMPK4	23	8
					Mono	5	irMPK4	23	7.5
					Mono	6	irMPK4	23	7.5
					Mono	7	irMPK4	23	8
					Mono	8	irMPK4	23	6.5
					Mono	9	irMPK4	23	7
					Mono	10	irMPK4	23	7
					Mono	11	irMPK4	23	5
					Mono	12	irMPK4	23	4.5
					Mono	1	irMPK4	23	8
					Mono	2	irMPK4	23	7.5
					Mono	3	irMPK4	23	8
					Mono	4	irMPK4	23	6.5
					Mono	5	irMPK4	23	7.5
					Mono	6	irMPK4	23	6.5
					Mono	7	irMPK4	23	7
					Mono	8	irMPK4	23	6.5
					Mono	9	irMPK4	23	7
					Mono	10	irMPK4	23	7
					Mono	11	irMPK4	23	5.5
					Mono	12	irMPK4	23	5.5
					Mix	1	irMPK4	23	5.5
					Mix	2	irMPK4	23	6
					Mix	3	irMPK4	23	5.5
					Mix	4	irMPK4	23	8
					Mix	5	irMPK4	23	6.5
					Mix	6	irMPK4	23	6
					Mix	7	irMPK4	23	5.5
					Mix	8	irMPK4	23	8
					Mix	9	irMPK4	23	6.5
					Mix	10	irMPK4	23	8.5
					Mix	11	irMPK4	23	6.5
					Mix	12	irMPK4	23	6
					Single	1	irMPK4	29	8
					Single	2	irMPK4	29	6
					Single	3	irMPK4	29	7.5
					Single	4	irMPK4	29	6
					Single	5	irMPK4	29	8
					Single	6	irMPK4	29	8
					Single	7	irMPK4	29	7
					Single	8	irMPK4	29	7
					Single	9	irMPK4	29	5.5
					Single	10	irMPK4	29	7.5
					Single	11	irMPK4	29	8
					Single	12	irMPK4	29	7.5
					Mono	1	irMPK4	29	8
					Mono	2	irMPK4	29	8
					Mono	3	irMPK4	29	8.5
					Mono	4	irMPK4	29	8.5
					Mono	5	irMPK4	29	9
					Mono	6	irMPK4	29	8
					Mono	7	irMPK4	29	8.5
					Mono	8	irMPK4	29	8.5
					Mono	9	irMPK4	29	8.5
					Mono	10	irMPK4	29	7.5
					Mono	11	irMPK4	29	6.5
					Mono	12	irMPK4	29	6
					Mono	1	irMPK4	29	9
					Mono	2	irMPK4	29	8
					Mono	3	irMPK4	29	7.5
					Mono	4	irMPK4	29	7.5
					Mono	5	irMPK4	29	8.5
					Mono	6	irMPK4	29	8
					Mono	7	irMPK4	29	8.5
					Mono	8	irMPK4	29	7
					Mono	9	irMPK4	29	8
					Mono	10	irMPK4	29	8
					Mono	11	irMPK4	29	7
					Mono	12	irMPK4	29	6.5
					Mix	1	irMPK4	29	7
					Mix	2	irMPK4	29	6
					Mix	3	irMPK4	29	8
					Mix	4	irMPK4	29	9
					Mix	5	irMPK4	29	6.5
					Mix	6	irMPK4	29	6.5
					Mix	7	irMPK4	29	7
					Mix	8	irMPK4	29	8.5
					Mix	9	irMPK4	29	8
					Mix	10	irMPK4	29	9.5
					Mix	11	irMPK4	29	6.5
					Mix	12	irMPK4	29	8
					Single	1	irMPK4	35	9
					Single	2	irMPK4	35	8
					Single	3	irMPK4	35	9
					Single	4	irMPK4	35	7
					Single	5	irMPK4	35	9
					Single	6	irMPK4	35	9
					Single	7	irMPK4	35	9
					Single	8	irMPK4	35	7
					Single	9	irMPK4	35	7
					Single	10	irMPK4	35	8
					Single	11	irMPK4	35	8
					Single	12	irMPK4	35	9
					Mono	1	irMPK4	35	8
					Mono	2	irMPK4	35	8
					Mono	3	irMPK4	35	8
					Mono	4	irMPK4	35	9
					Mono	5	irMPK4	35	10
					Mono	6	irMPK4	35	8
					Mono	7	irMPK4	35	10
					Mono	8	irMPK4	35	9
					Mono	9	irMPK4	35	9
					Mono	10	irMPK4	35	9
					Mono	11	irMPK4	35	8
					Mono	12	irMPK4	35	8
					Mono	1	irMPK4	35	10
					Mono	2	irMPK4	35	8
					Mono	3	irMPK4	35	9
					Mono	4	irMPK4	35	8
					Mono	5	irMPK4	35	9
					Mono	6	irMPK4	35	8
					Mono	7	irMPK4	35	10
					Mono	8	irMPK4	35	8
					Mono	9	irMPK4	35	9
					Mono	10	irMPK4	35	9
					Mono	11	irMPK4	35	8
					Mono	12	irMPK4	35	8
					Mix	1	irMPK4	35	9
					Mix	2	irMPK4	35	8
					Mix	3	irMPK4	35	8
					Mix	4	irMPK4	35	9
					Mix	5	irMPK4	35	8
					Mix	6	irMPK4	35	9
					Mix	7	irMPK4	35	7.5
					Mix	8	irMPK4	35	10
					Mix	9	irMPK4	35	9
					Mix	10	irMPK4	35	10
					Mix	11	irMPK4	35	8
					Mix	12	irMPK4	35	8
					Single	1	irMPK4	41	9.8
					Single	2	irMPK4	41	9.4
					Single	3	irMPK4	41	10.6
					Single	4	irMPK4	41	10
					Single	5	irMPK4	41	10
					Single	6	irMPK4	41	10.6
					Single	7	irMPK4	41	10.4
					Single	8	irMPK4	41	8.6
					Single	9	irMPK4	41	9
					Single	10	irMPK4	41	10
					Single	11	irMPK4	41	10.2
					Single	12	irMPK4	41	11
					Mono	1	irMPK4	41	10
					Mono	2	irMPK4	41	9.8
					Mono	3	irMPK4	41	9.8
					Mono	4	irMPK4	41	10.4
					Mono	5	irMPK4	41	10.6
					Mono	6	irMPK4	41	9.4
					Mono	7	irMPK4	41	9.8
					Mono	8	irMPK4	41	10
					Mono	9	irMPK4	41	9.8
					Mono	10	irMPK4	41	9
					Mono	11	irMPK4	41	9.4
					Mono	12	irMPK4	41	9
					Mono	1	irMPK4	41	11
					Mono	2	irMPK4	41	9.2
					Mono	3	irMPK4	41	9.4
					Mono	4	irMPK4	41	9
					Mono	5	irMPK4	41	10.2
					Mono	6	irMPK4	41	9.2
					Mono	7	irMPK4	41	10.2
					Mono	8	irMPK4	41	8.8
					Mono	9	irMPK4	41	9.8
					Mono	10	irMPK4	41	9
					Mono	11	irMPK4	41	9.4
					Mono	12	irMPK4	41	8.4
					Mix	1	irMPK4	41	10.6
					Mix	2	irMPK4	41	9.4
					Mix	3	irMPK4	41	9.6
					Mix	4	irMPK4	41	10
					Mix	5	irMPK4	41	8.6
					Mix	6	irMPK4	41	8.4
					Mix	7	irMPK4	41	9.6
					Mix	8	irMPK4	41	10.2
					Mix	9	irMPK4	41	10
					Mix	10	irMPK4	41	10
					Mix	11	irMPK4	41	8.6
					Mix	12	irMPK4	41	9.2
					Single	1	irMPK4	47	9
					Single	2	irMPK4	47	9
					Single	3	irMPK4	47	11
					Single	4	irMPK4	47	10
					Single	5	irMPK4	47	10
					Single	6	irMPK4	47	10
					Single	7	irMPK4	47	10.6
					Single	8	irMPK4	47	9.5
					Single	9	irMPK4	47	10
					Single	10	irMPK4	47	10
					Single	11	irMPK4	47	10.6
					Single	12	irMPK4	47	9
					Mono	1	irMPK4	47	10
					Mono	2	irMPK4	47	10
					Mono	3	irMPK4	47	9
					Mono	4	irMPK4	47	10
					Mono	5	irMPK4	47	10
					Mono	6	irMPK4	47	9
					Mono	7	irMPK4	47	10
					Mono	8	irMPK4	47	9.5
					Mono	9	irMPK4	47	9
					Mono	10	irMPK4	47	9
					Mono	11	irMPK4	47	10
					Mono	12	irMPK4	47	9
					Mono	1	irMPK4	47	10
					Mono	2	irMPK4	47	9.5
					Mono	3	irMPK4	47	9
					Mono	4	irMPK4	47	9
					Mono	5	irMPK4	47	10
					Mono	6	irMPK4	47	9
					Mono	7	irMPK4	47	10
					Mono	8	irMPK4	47	9.5
					Mono	9	irMPK4	47	10
					Mono	10	irMPK4	47	9
					Mono	11	irMPK4	47	9.5
					Mono	12	irMPK4	47	9
					Mix	1	irMPK4	47	10
					Mix	2	irMPK4	47	9
					Mix	3	irMPK4	47	8.5
					Mix	4	irMPK4	47	10
					Mix	5	irMPK4	47	7.5
					Mix	6	irMPK4	47	8
					Mix	7	irMPK4	47	9
					Mix	8	irMPK4	47	10
					Mix	9	irMPK4	47	9
					Mix	10	irMPK4	47	9.5
					Mix	11	irMPK4	47	9
					Mix	12	irMPK4	47	9
					Single	2	irMPK4	53	9.4
					Single	3	irMPK4	53	11
					Single	4	irMPK4	53	10
					Single	5	irMPK4	53	10
					Single	6	irMPK4	53	10.2
					Single	7	irMPK4	53	11
					Single	8	irMPK4	53	9
					Single	9	irMPK4	53	10
					Single	10	irMPK4	53	10
					Single	11	irMPK4	53	10
					Single	12	irMPK4	53	8
					Mono	1	irMPK4	53	10
					Mono	2	irMPK4	53	9.4
					Mono	3	irMPK4	53	10
					Mono	4	irMPK4	53	10.4
					Mono	5	irMPK4	53	10.4
					Mono	6	irMPK4	53	10
					Mono	7	irMPK4	53	9.5
					Mono	9	irMPK4	53	9
					Mono	10	irMPK4	53	9.5
					Mono	11	irMPK4	53	10
					Mono	12	irMPK4	53	9.5
					Mono	1	irMPK4	53	10.6
					Mono	2	irMPK4	53	9.4
					Mono	3	irMPK4	53	9.4
					Mono	4	irMPK4	53	8.5
					Mono	5	irMPK4	53	9.4
					Mono	6	irMPK4	53	9.5
					Mono	7	irMPK4	53	10
					Mono	9	irMPK4	53	9.5
					Mono	10	irMPK4	53	8.5
					Mono	11	irMPK4	53	10
					Mono	12	irMPK4	53	8
					Mix	1	irMPK4	53	11
					Mix	2	irMPK4	53	10
					Mix	3	irMPK4	53	9
					Mix	4	irMPK4	53	9.5
					Mix	5	irMPK4	53	9.5
					Mix	6	irMPK4	53	8
					Mix	8	irMPK4	53	10
					Mix	9	irMPK4	53	9
					Mix	10	irMPK4	53	9
					Mix	11	irMPK4	53	10
					Mix	12	irMPK4	53	8
