# Supplementary material for: Determining the scale at which variation in a single gene changes population yields
Source: eLife. 2020 Feb 14;9:e53517. doi: 10.7554/eLife.53517 (PMC7136025; doi:10.7554/eLife.53517)
Supplement: Figure 5—figure supplement 1—source data 1. [file elife-53517-fig5-figsupp1-data1.xlsx]

## Sheet: Feuil1
Figure 5-figure supplement 1A					Figure 5-figure supplement 1B					Figure 5-figure supplement 1C					Figure 5-figure supplement 1D						Figure 5-figure supplement 1E
% irMPK4 in Population	Replicate	Genotype	Fv/Fm		% irMPK4 in Population	Genotype	Sampling Time	Assimilation (umol CO2/m2s)		% irMPK4 in Population	Genotype	Sampling Time	Transpiration (mmol H2O/m2s)		% irMPK4 in Population	Genotype	Replicate	Sampling Time	Stomatal Conductance (mmol/m2s)		% irMPK4 in Population	Genotype	Replicate	Sampling Time	WUE (CO2/H2O)
0	4	EV	0.81777		0	EV	AM	26.3121		0	EV	AM	-0.0465383		0	EV	4	AM	-0.00168007		0	EV	6	AM	3.60487e-05
0	6	EV	0.815158		0	EV	AM	0.00812157		0	EV	AM	0.225295		0	EV	6	AM	0.00812157		0	EV	9	AM	3.63093e-05
0	9	EV	0.818465		0	EV	AM	0.0116308		0	EV	AM	0.320324		0	EV	9	AM	0.0116308		0	EV	10	AM	3.48752e-05
0	10	EV	0.816698		0	EV	AM	0.00247757		0	EV	AM	0.071041		0	EV	10	AM	0.00247757		17	irMPK4	2	AM	3.63525e-05
17	2	irMPK4	0.813935		17	irMPK4	AM	0.0319767		17	irMPK4	AM	0.879629		17	irMPK4	2	AM	0.0319767		17	irMPK4	6	AM	3.76262e-05
17	6	irMPK4	0.80994		17	irMPK4	AM	0.0468906		17	irMPK4	AM	1.24622		17	irMPK4	6	AM	0.0468906		17	irMPK4	8	AM	3.69012e-05
17	8	irMPK4	0.816101		17	irMPK4	AM	0.0373965		17	irMPK4	AM	1.01342		17	irMPK4	8	AM	0.0373965		17	irMPK4	12	AM	0.0645445
17	12	irMPK4	0.822827		17	irMPK4	AM	33.4399		17	irMPK4	AM	0.518091		17	irMPK4	12	AM	0.0201623		50	irMPK4	9	AM	0.115852
50	9	irMPK4	0.807581		50	irMPK4	AM	38.2534		50	irMPK4	AM	0.330192		50	irMPK4	9	AM	0.0119088		50	irMPK4	12	AM	0.0461638
50	12	irMPK4	0.824044		50	irMPK4	AM	27.2352		50	irMPK4	AM	0.589968		50	irMPK4	12	AM	0.0216727		83	irMPK4	2	AM	0.0266897
83	2	irMPK4	0.816941		83	irMPK4	AM	29.5323		83	irMPK4	AM	1.10651		83	irMPK4	2	AM	0.0467255		83	irMPK4	7	AM	0.0446636
83	7	irMPK4	0.817943		83	irMPK4	AM	28.3792		83	irMPK4	AM	0.635398		83	irMPK4	7	AM	0.0249131		83	irMPK4	9	AM	0.0130436
83	9	irMPK4	0.828103		83	irMPK4	AM	21.7761		83	irMPK4	AM	1.66949		83	irMPK4	9	AM	0.0711147		83	irMPK4	10	AM	0.016788
83	10	irMPK4	0.824428		83	irMPK4	AM	27.8314		83	irMPK4	AM	1.65782		83	irMPK4	10	AM	0.0717042		100	irMPK4	5	AM	0.0390565
100	5	irMPK4	0.822802		100	irMPK4	AM	27.5954		100	irMPK4	AM	0.706551		100	irMPK4	5	AM	0.0280455		100	irMPK4	8	AM	0.0519378
100	8	irMPK4	0.822177		100	irMPK4	AM	42.0666		100	irMPK4	AM	0.809942		100	irMPK4	8	AM	0.0303865		100	irMPK4	6	AM	0.0446282
100	6	irMPK4	0.822423		100	irMPK4	AM	39.0194		100	irMPK4	AM	0.874322		100	irMPK4	6	AM	0.0336878		100	irMPK4	9	AM	0.0310953
100	9	irMPK4	0.824256		100	irMPK4	AM	33.6616		100	irMPK4	AM	1.08253		100	irMPK4	9	AM	0.0440277		100	irMPK4	11	AM	0.0327376
100	11	irMPK4	0.826543		100	irMPK4	AM	29.9936		100	irMPK4	AM	0.916182		100	irMPK4	11	AM	0.0332135		0	EV	3	AM	-0.0131422
0	3	EV	0.82057		0	EV	AM	-8.97886		0	EV	AM	0.683209		0	EV	3	AM	0.0391996		0	EV	6	AM	-0.0264612
0	6	EV	0.831454		0	EV	AM	-8.82313		0	EV	AM	0.333437		0	EV	6	AM	0.0200426		0	EV	8	AM	-0.0178913
0	8	EV	0.822104		0	EV	AM	-8.82288		0	EV	AM	0.493137		0	EV	8	AM	0.0288342		0	EV	11	AM	-0.0151795
0	11	EV	0.828958		0	EV	AM	-8.78029		0	EV	AM	0.578431		0	EV	11	AM	0.0334723		17	irMPK4	10	AM	0.00506068
17	11	irMPK4	0.82837		17	irMPK4	AM	18.7774		17	irMPK4	AM	3.71044		17	irMPK4	10	AM	0.279862		17	irMPK4	11	AM	0.00174242
50	1	irMPK4	0.82738		17	irMPK4	AM	3.79595		17	irMPK4	AM	2.17856		17	irMPK4	11	AM	0.139327		50	irMPK4	1	AM	-0.00230271
50	4	irMPK4	0.826245		50	irMPK4	AM	-9.72031		50	irMPK4	AM	4.22124		50	irMPK4	1	AM	0.321307		50	irMPK4	4	AM	-0.00327521
50	7	irMPK4	0.826828		50	irMPK4	AM	-8.72754		50	irMPK4	AM	2.66473		50	irMPK4	4	AM	0.173037		50	irMPK4	7	AM	-0.00194032
50	10	irMPK4	0.830623		50	irMPK4	AM	-9.68623		50	irMPK4	AM	4.99208		50	irMPK4	7	AM	0.406218		50	irMPK4	10	AM	-0.00245527
83	4	irMPK4	0.830383		50	irMPK4	AM	-8.56001		50	irMPK4	AM	3.48638		50	irMPK4	10	AM	0.248221		83	irMPK4	4	AM	-0.0022325
83	7	irMPK4	0.825776		83	irMPK4	AM	-9.12005		83	irMPK4	AM	4.08513		83	irMPK4	4	AM	0.286608		83	irMPK4	7	AM	-0.00185578
83	9	irMPK4	0.824782		83	irMPK4	AM	-8.45062		83	irMPK4	AM	4.55366		83	irMPK4	7	AM	0.359326		83	irMPK4	9	AM	0.0024503
83	11	irMPK4	0.839252		83	irMPK4	AM	15.546		83	irMPK4	AM	6.34453		83	irMPK4	9	AM	0.326206		83	irMPK4	11	AM	0.00224468
100	8	irMPK4	0.828889		83	irMPK4	AM	25.1407		100	irMPK4	AM	3.99087		100	irMPK4	8	AM	0.300173		100	irMPK4	8	AM	0.00200828
100	5	irMPK4	0.830353		100	irMPK4	AM	8.0148		100	irMPK4	AM	5.24171		100	irMPK4	5	AM	0.443922		100	irMPK4	5	AM	0.00152496
100	7	irMPK4	0.827572		100	irMPK4	AM	7.99341		100	irMPK4	AM	4.00265		100	irMPK4	7	AM	0.310285		100	irMPK4	7	AM	0.00266454
100	10	irMPK4	0.828236		100	irMPK4	AM	10.6652		100	irMPK4	AM	4.07486		100	irMPK4	10	AM	0.31586		100	irMPK4	10	AM	0.00284921
100	11	irMPK4	0.834521		100	irMPK4	AM	11.6101		100	irMPK4	AM	5.82264		100	irMPK4	11	AM	0.541226		100	irMPK4	11	AM	0.000497803
100	12	irMPK4	0.836941		100	irMPK4	AM	2.89853		100	irMPK4	AM	4.55759		100	irMPK4	12	AM	0.36256		100	irMPK4	12	AM	0.000830818
0	4	EV	0.816506		100	irMPK4	AM	3.78653		0	EV	AM	-0.0318598		0	EV	4	AM	-0.00116777		0	EV	6	AM	3.49337e-05
0	6	EV	0.824862		0	EV	AM	43.8067		0	EV	AM	0.230113		0	EV	6	AM	0.00803867		0	EV	9	AM	3.4759e-05
0	9	EV	0.818288		0	EV	AM	0.00803867		0	EV	AM	0.0806827		0	EV	9	AM	0.00280445		0	EV	10	AM	3.53479e-05
0	10	EV	0.812682		0	EV	AM	0.00280445		0	EV	AM	0.147319		0	EV	10	AM	0.0052074		17	EV	2	AM	3.69271e-05
17	2	EV	0.816117		0	EV	AM	0.0052074		17	EV	AM	0.388631		17	EV	2	AM	0.014351		17	EV	4	AM	3.50654e-05
17	4	EV	0.819187		17	EV	AM	0.014351		17	EV	AM	0.0988079		17	EV	4	AM	0.00346474		17	EV	6	AM	3.59258e-05
17	6	EV	0.80815		17	EV	AM	0.00346474		17	EV	AM	0.342484		17	EV	6	AM	0.012304		17	EV	8	AM	3.59381e-05
17	8	EV	0.820361		17	EV	AM	0.012304		17	EV	AM	0.171852		17	EV	8	AM	0.00617603		17	EV	12	AM	0.073297
17	12	EV	0.816758		17	EV	AM	0.00617603		17	EV	AM	0.223526		17	EV	12	AM	0.00858691		50	EV	5	AM	0.145409
50	9	EV	0.815769		17	EV	AM	16.3838		50	EV	AM	0.213402		50	EV	5	AM	0.00780128		50	EV	7	AM	0.119903
50	12	EV	0.820151		50	EV	AM	31.0304		50	EV	AM	0.113293		50	EV	9	AM	0.00418203		83	EV	2	AM	0.145873
50	7	EV	0.822399		50	EV	AM	27.7531		50	EV	AM	0.140449		50	EV	12	AM	0.0050452		83	EV	7	AM	0.108675
83	2	EV	0.822342		50	EV	AM	35.6552		50	EV	AM	0.215586		50	EV	7	AM	0.00803526		83	EV	10	AM	0.0613776
83	7	EV	0.817342		50	EV	AM	25.8495		83	EV	AM	0.157435		83	EV	2	AM	0.00602364		100	irMPK4	5	AM	0.0340184
83	9	EV	0.818319		83	EV	AM	22.9656		83	EV	AM	0.225762		83	EV	7	AM	0.00849413		100	irMPK4	8	AM	0.0247431
83	10	EV	0.828391		83	EV	AM	24.5347		83	EV	AM	0.441376		83	EV	10	AM	0.0168782		100	irMPK4	9	AM	0.0194642
100	5	irMPK4	0.830406		83	EV	AM	32.4767		100	irMPK4	AM	0.971732		100	irMPK4	5	AM	0.0399163		0	EV	3	AM	-0.0156825
100	8	irMPK4	0.818276		83	EV	AM	27.0906		100	irMPK4	AM	1.12045		100	irMPK4	8	AM	0.0435872		0	EV	6	AM	-0.0128742
100	9	irMPK4	0.820256		100	irMPK4	AM	33.0568		100	irMPK4	AM	1.37596		100	irMPK4	9	AM	0.055833		0	EV	8	AM	-0.0161068
0	3	EV	0.826536		100	irMPK4	AM	27.7234		0	EV	AM	0.578519		0	EV	3	AM	0.0337787		0	EV	11	AM	-0.019194
0	6	EV	0.815703		100	irMPK4	AM	26.782		0	EV	AM	0.730356		0	EV	6	AM	0.0447212		17	EV	10	AM	0.00316402
0	8	EV	0.835068		0	EV	AM	-9.07265		0	EV	AM	0.600566		0	EV	8	AM	0.0352236		17	EV	11	AM	0.00755897
0	11	EV	0.825601		0	EV	AM	-9.40277		0	EV	AM	0.470705		0	EV	11	AM	0.0270132		50	EV	1	AM	-0.0199375
17	10	EV	0.830221		0	EV	AM	-9.67321		17	EV	AM	1.17479		17	EV	10	AM	0.0705238		50	EV	4	AM	-0.00812373
17	11	EV	0.829675		0	EV	AM	-9.03471		17	EV	AM	1.68096		17	EV	11	AM	0.102358		50	EV	7	AM	-0.0099962
50	1	EV	0.821842		17	EV	AM	3.71708		50	EV	AM	0.434343		50	EV	1	AM	0.0234317		50	EV	10	AM	-0.00852271
50	4	EV	0.835346		17	EV	AM	12.7063		50	EV	AM	1.05123		50	EV	4	AM	0.0607896		83	EV	4	AM	-0.00577501
50	7	EV	0.831421		50	EV	AM	-8.65969		50	EV	AM	0.839607		50	EV	7	AM	0.0477591		83	EV	7	AM	-0.00711993
50	10	EV	0.832093		50	EV	AM	-8.5399		50	EV	AM	0.996883		50	EV	10	AM	0.0585983		83	EV	9	AM	0.00476737
83	4	EV	0.834563		50	EV	AM	-8.39288		83	EV	AM	1.43012		83	EV	4	AM	0.0834809		83	EV	11	AM	0.00413634
83	7	EV	0.82395		50	EV	AM	-8.49614		83	EV	AM	1.17126		83	EV	7	AM	0.0696647		100	irMPK4	8	AM	0.00236725
83	9	EV	0.831697		83	EV	AM	-8.25897		83	EV	AM	3.10342		83	EV	9	AM	0.129018		100	irMPK4	7	AM	0.00244115
83	11	EV	0.834367		83	EV	AM	-8.33926		83	EV	AM	3.22605		83	EV	11	AM	0.135777		100	irMPK4	10	AM	0.000593692
100	8	irMPK4	0.822463		83	EV	AM	14.7951		100	irMPK4	AM	4.60652		100	irMPK4	8	AM	0.378318		100	irMPK4	11	AM	0.000276772
100	7	irMPK4	0.827751		83	EV	AM	13.3441		100	irMPK4	AM	4.34762		100	irMPK4	7	AM	0.334607		100	irMPK4	12	AM	0.00149033
100	10	irMPK4	0.819938		100	irMPK4	AM	10.9048		100	irMPK4	AM	4.36855		100	irMPK4	10	AM	0.335408		0	EV	6	AM	3.58109e-05
100	11	irMPK4	0.828921		100	irMPK4	AM	10.6132		100	irMPK4	AM	5.74714		100	irMPK4	11	AM	0.508789		0	EV	9	AM	3.55803e-05
100	12	irMPK4	0.835191		100	irMPK4	AM	2.59357		100	irMPK4	AM	3.67817		100	irMPK4	12	AM	0.273366		0	EV	10	AM	3.54246e-05
0	4	EV	0.821463		100	irMPK4	AM	1.59065		0	EV	AM	0.11967		0	EV	4	AM	0.00448961		17	EV	2	AM	3.5251e-05
0	6	EV	0.822091		100	irMPK4	AM	5.48169		0	EV	AM	0.30603		0	EV	6	AM	0.0109592		17	EV	8	AM	3.62131e-05
0	9	EV	0.827161		0	EV	AM	28.533		0	EV	AM	0.242367		0	EV	9	AM	0.00862348		50	EV	7	AM	0.148173
0	10	EV	0.821165		0	EV	AM	0.0109592		0	EV	AM	0.107875		0	EV	10	AM	0.00382144		83	EV	2	AM	0.0819147
17	2	EV	0.819213		0	EV	AM	0.00862348		17	EV	AM	0.0528332		17	EV	2	AM	0.00186242		83	EV	7	AM	0.0853337
17	8	EV	0.81623		0	EV	AM	0.00382144		17	EV	AM	0.269268		17	EV	8	AM	0.00975103		83	EV	9	AM	0.1002
17	10	EV	0.829004		17	EV	AM	0.00186242		50	EV	AM	0.0604602		50	EV	5	AM	0.00222013		83	EV	10	AM	0.141097
50	5	EV	0.813539		17	EV	AM	0.00975103		50	EV	AM	0.147748		50	EV	9	AM	0.00532853		100	irMPK4	5	AM	0.0163724
50	9	EV	0.828882		17	EV	AM	31.7241		50	EV	AM	0.182141		50	EV	7	AM	0.00682782		100	irMPK4	8	AM	0.0211537
50	7	EV	0.825793		50	EV	AM	43.6699		50	EV	AM	0.0762808		50	EV	1	AM	0.00279781		100	irMPK4	6	AM	0.0310134
50	1	EV	0.821135		50	EV	AM	29.1174		83	EV	AM	0.214246		83	EV	2	AM	0.00813072		100	irMPK4	9	AM	0.0112065
83	2	EV	0.82803		50	EV	AM	26.9883		83	EV	AM	0.256844		83	EV	7	AM	0.00943118		100	irMPK4	11	AM	0.0254664
83	7	EV	0.821965		50	EV	AM	33.5547		83	EV	AM	0.233613		83	EV	9	AM	0.00849949		0	EV	3	AM	-0.0335052
83	9	EV	0.816119		83	EV	AM	17.5499		83	EV	AM	0.199177		83	EV	10	AM	0.00740915		0	EV	6	AM	-0.0217304
83	10	EV	0.827888		83	EV	AM	21.9174		100	irMPK4	AM	1.85789		100	irMPK4	5	AM	0.0829761		0	EV	8	AM	-0.0149868
100	5	irMPK4	0.826089		83	EV	AM	23.4081		100	irMPK4	AM	1.5447		100	irMPK4	8	AM	0.0657168		0	EV	11	AM	-0.0124185
100	8	irMPK4	0.825266		83	EV	AM	28.1032		100	irMPK4	AM	1.07457		100	irMPK4	6	AM	0.0433054		17	EV	3	AM	0.00736251
100	6	irMPK4	0.817691		100	irMPK4	AM	30.418		100	irMPK4	AM	2.16612		100	irMPK4	9	AM	0.0963763		17	EV	11	AM	0.0090024
100	9	irMPK4	0.831771		100	irMPK4	AM	32.676		100	irMPK4	AM	1.15732		100	irMPK4	11	AM	0.0459871		17	EV	12	AM	0.00456827
100	11	irMPK4	0.820996		100	irMPK4	AM	33.3262		0	EV	AM	0.254027		0	EV	3	AM	0.0145868		50	EV	1	AM	-0.0109421
0	3	EV	0.829064		100	irMPK4	AM	24.2745		0	EV	AM	0.407779		0	EV	6	AM	0.0241633		50	EV	4	AM	-0.00838689
0	6	EV	0.836154		100	irMPK4	AM	29.4729		0	EV	AM	0.584959		0	EV	8	AM	0.0342378		50	EV	7	AM	-0.0037764
0	8	EV	0.825382		0	EV	AM	-8.51122		0	EV	AM	0.666347		0	EV	11	AM	0.0392173		50	EV	10	AM	-0.0114324
0	11	EV	0.813184		0	EV	AM	-8.86118		17	EV	AM	1.33099		17	EV	3	AM	0.0791485		83	EV	4	AM	-0.00622372
17	3	EV	0.825655		0	EV	AM	-8.76668		17	EV	AM	1.64253		17	EV	11	AM	0.0991135		83	EV	7	AM	0.00307756
17	11	EV	0.827075		0	EV	AM	-8.27505		17	EV	AM	1.21833		17	EV	12	AM	0.0724748		83	EV	9	AM	0.00404263
17	12	EV	0.825227		17	EV	AM	9.79946		50	EV	AM	0.769271		50	EV	1	AM	0.0430754		83	EV	11	AM	0.0105146
50	1	EV	0.828379		17	EV	AM	14.7867		50	EV	AM	1.05234		50	EV	4	AM	0.0613473		100	irMPK4	8	AM	0.00306337
50	4	EV	0.831827		17	EV	AM	5.56569		50	EV	AM	2.38065		50	EV	7	AM	0.150575		100	irMPK4	11	AM	0.00287422
50	7	EV	0.82826		50	EV	AM	-8.41743		50	EV	AM	0.726722		50	EV	10	AM	0.0419941		0	EV	6	AM	3.51693e-05
50	10	EV	0.834293		50	EV	AM	-8.82583		83	EV	AM	1.26528		83	EV	4	AM	0.0757545		0	EV	9	AM	3.51593e-05
83	4	EV	0.832721		50	EV	AM	-8.99028		83	EV	AM	4.04595		83	EV	7	AM	0.179023		0	EV	10	AM	3.60626e-05
83	7	EV	0.833524		50	EV	AM	-8.30817		83	EV	AM	2.79961		83	EV	9	AM	0.115592		17	irMPK4	2	AM	4.11467e-05
83	9	EV	0.835206		83	EV	AM	-7.87478		83	EV	AM	4.52446		83	EV	11	AM	0.203946		17	irMPK4	4	AM	3.74395e-05
83	11	EV	0.833012		83	EV	AM	12.4517		100	irMPK4	AM	4.12723		100	irMPK4	8	AM	0.321725		17	irMPK4	8	AM	3.87362e-05
100	8	irMPK4	0.826548		83	EV	AM	11.3178		100	irMPK4	AM	3.49847		100	irMPK4	11	AM	0.254422		17	irMPK4	10	AM	0.0281591
100	11	irMPK4	0.827362		83	EV	AM	47.5729		0	EV	AM	0.16803		0	EV	6	AM	0.00590951		50	irMPK4	5	AM	0.0351218
0	4	EV	0.822085		100	irMPK4	AM	12.6432		0	EV	AM	0.108389		0	EV	9	AM	0.00381088		50	irMPK4	7	AM	0.0502493
0	6	EV	0.818957		100	irMPK4	AM	10.0554		0	EV	AM	0.153844		0	EV	10	AM	0.00554801		50	irMPK4	1	AM	0.0679543
0	9	EV	0.81795		0	EV	AM	43.4515		17	irMPK4	AM	1.73185		17	irMPK4	2	AM	0.0712597		83	irMPK4	2	AM	0.027855
0	10	EV	0.81584		0	EV	AM	0.00590951		17	irMPK4	AM	0.965581		17	irMPK4	4	AM	0.0361509		83	irMPK4	7	AM	0.0144445
17	2	irMPK4	0.827486		0	EV	AM	0.00381088		17	irMPK4	AM	1.56472		17	irMPK4	8	AM	0.0606115		83	irMPK4	9	AM	0.0246618
17	4	irMPK4	0.816862		0	EV	AM	0.00554801		17	irMPK4	AM	0.769265		17	irMPK4	10	AM	0.0311254		83	irMPK4	10	AM	0.024884
17	8	irMPK4	0.823784		17	irMPK4	AM	0.0712597		50	irMPK4	AM	0.97221		50	irMPK4	5	AM	0.0383714		100	irMPK4	5	AM	0.0209144
17	10	irMPK4	0.81572		17	irMPK4	AM	0.0361509		50	irMPK4	AM	0.896453		50	irMPK4	7	AM	0.0327733		100	irMPK4	8	AM	0.0247056
50	5	irMPK4	0.829696		17	irMPK4	AM	0.0606115		50	irMPK4	AM	0.47968		50	irMPK4	1	AM	0.0173874		100	irMPK4	6	AM	0.0269442
50	7	irMPK4	0.80799		17	irMPK4	AM	21.6618		83	irMPK4	AM	1.33153		83	irMPK4	2	AM	0.0568312		0	EV	3	AM	-0.0228885
50	1	irMPK4	0.821289		50	irMPK4	AM	34.1457		83	irMPK4	AM	1.33367		83	irMPK4	7	AM	0.055296		0	EV	6	AM	-0.0219463
83	2	irMPK4	0.825567		50	irMPK4	AM	32.5964		83	irMPK4	AM	1.01234		83	irMPK4	9	AM	0.0397653		0	EV	8	AM	-0.00538901
83	7	irMPK4	0.816479		83	irMPK4	AM	37.0896		83	irMPK4	AM	1.30778		83	irMPK4	10	AM	0.0543522		0	EV	11	AM	-0.0135084
83	9	irMPK4	0.813598		83	irMPK4	AM	19.2642		100	irMPK4	AM	1.45343		100	irMPK4	5	AM	0.0590362		17	irMPK4	3	AM	0.00267964
83	10	irMPK4	0.822754		83	irMPK4	AM	24.9662		100	irMPK4	AM	1.13576		100	irMPK4	8	AM	0.0453411		17	irMPK4	12	AM	0.00163047
100	5	irMPK4	0.825478		83	irMPK4	AM	32.5428		100	irMPK4	AM	0.975602		100	irMPK4	6	AM	0.0390922		50	irMPK4	1	AM	-0.00231
100	8	irMPK4	0.822143		100	irMPK4	AM	30.3976		0	EV	AM	0.395048		0	EV	3	AM	0.023656		50	irMPK4	4	AM	-0.00166286
100	6	irMPK4	0.817323		100	irMPK4	AM	28.0596		0	EV	AM	0.418118		0	EV	6	AM	0.0243795		50	irMPK4	7	AM	-0.00276379
0	3	EV	0.829142		100	irMPK4	AM	26.2868		0	EV	AM	1.76924		0	EV	8	AM	0.108844		50	irMPK4	10	AM	-0.00192417
0	6	EV	0.825753		0	EV	AM	-9.04204		0	EV	AM	0.656535		0	EV	11	AM	0.0386791		83	irMPK4	4	AM	-0.00212339
0	8	EV	0.832875		0	EV	AM	-9.17612		17	irMPK4	AM	4.66422		17	irMPK4	3	AM	0.364141		83	irMPK4	7	AM	0.00100866
0	11	EV	0.833635		0	EV	AM	-9.53446		17	irMPK4	AM	4.49807		17	irMPK4	12	AM	0.36584		83	irMPK4	9	AM	0.00178736
17	3	irMPK4	0.83756		0	EV	AM	-8.86876		50	irMPK4	AM	3.77465		50	irMPK4	1	AM	0.271994		83	irMPK4	11	AM	0.00180987
17	12	irMPK4	0.832216		17	irMPK4	AM	12.4984		50	irMPK4	AM	5.09104		50	irMPK4	4	AM	0.380605		100	irMPK4	8	AM	0.0018116
50	1	irMPK4	0.82693		17	irMPK4	AM	7.33397		50	irMPK4	AM	3.24503		50	irMPK4	7	AM	0.227285		100	irMPK4	5	AM	0.00320413
50	4	irMPK4	0.833689		50	irMPK4	AM	-8.71945		50	irMPK4	AM	3.96839		50	irMPK4	10	AM	0.295484		100	irMPK4	12	AM	0.00976447
50	7	irMPK4	0.828357		50	irMPK4	AM	-8.46567		83	irMPK4	AM	4.03041		83	irMPK4	4	AM	0.299371
50	10	irMPK4	0.82525		50	irMPK4	AM	-8.9686		83	irMPK4	AM	8.11692		83	irMPK4	7	AM	0.438112
83	4	irMPK4	0.8275		50	irMPK4	AM	-7.63584		83	irMPK4	AM	7.53595		83	irMPK4	9	AM	0.41178
83	7	irMPK4	0.829215		83	irMPK4	AM	-8.55814		83	irMPK4	AM	9.09076		83	irMPK4	11	AM	0.57794
83	9	irMPK4	0.825706		83	irMPK4	AM	8.18717		100	irMPK4	AM	4.26759		100	irMPK4	8	AM	0.327468
83	11	irMPK4	0.835622		83	irMPK4	AM	13.4694		100	irMPK4	AM	3.7594		100	irMPK4	5	AM	0.269377
100	8	irMPK4	0.827451		83	irMPK4	AM	16.4531		100	irMPK4	AM	4.871		100	irMPK4	12	AM	0.404597
100	5	irMPK4	0.824706		100	irMPK4	AM	7.73115
100	12	irMPK4	0.833423		100	irMPK4	AM	12.0456
					100	irMPK4	AM	47.5627
