# Supplementary material for: Determining the scale at which variation in a single gene changes population yields
Source: eLife. 2020 Feb 14;9:e53517. doi: 10.7554/eLife.53517 (PMC7136025; doi:10.7554/eLife.53517)
Supplement: Figure 5—source data 1. [file elife-53517-fig5-data1.xlsx]

## Sheet: Feuil1
Figure 5A Panel 1					Figure 5A Panel 2					Figure 5A Panel 3					Figure 5A Panel 4					Figure 5B Panel 1					Figure 5B Panel 2					Figure 5B Panel 3						Figure 5B Panel 4						Figure 5C
Potting	Genotype	Replicate	Assimilation (umol CO2/m2s)		Potting	Genotype	Replicate	Transpiration (mmol H20/m2s)		Potting	Genotype	Replicate	Stomatal Conductance (mmol/m2s)		Potting	Genotype	Replicate	WUE (C02/H20)		% irMPK4 in Population	Genotype	Sampling Time	Assimilation (umol CO2/m2s)		% irMPK4 in Population	Genotype	Sampling Time	Transpiration (mmol H2O/m2s)		% irMPK4 in Population	Genotype	Replicate	Sampling Time	Stomatal Conductance (mmol/m2s)		% irMPK4 in Population	Genotype	Replicate	Sampling Time	WUE (CO2/H2O)		% irMPK4 in Populations	Treatment	AMF Interaction	Genotype	Photosynthesis (CO2 umol/m2s)	Stomatal Conductance (mmol/m2s)	Transpiration (H2O mmol/m2s)	WUE (CO2/H2O)
Single	MPK4	5	28.3805		Single	MPK4	3	0.00408551		Single	MPK4	5	0.197606		Single	MPK4	3	6.33179		0	EV	PM	37.227		0	EV	PM	2.113		0	EV	1	PM	0.0630024		0	EV	1	PM	17.6181		0	Wet	No	EVxCC	13.3018	0.161129	4.78446	2.78021
Single	MPK4	6	30.865		Single	MPK4	5	0.00433751		Single	MPK4	6	0.197987		Single	MPK4	5	6.54303		0	EV	PM	15.252		0	EV	PM	3.45704		0	EV	6	PM	0.179706		0	EV	6	PM	4.41187		100	Wet	No	MPxCC	13.288	0.0387469	1.80082	7.37884
Single	MPK4	7	32.0416		Single	MPK4	6	0.00435371		Single	MPK4	7	0.200025		Single	MPK4	6	7.08935		0	EV	PM	10.2792		0	EV	PM	1.18944		0	EV	9	PM	0.0517407		0	EV	9	PM	8.6421		75	Wet	No	EVxCC	14.7619	0.0911589	3.04655	4.84545
Single	EV	1	25.9012		Single	MPK4	7	0.00430983		Single	EV	1	0.102917		Single	MPK4	7	7.43453		0	EV	PM	9.13221		0	EV	PM	1.73436		0	EV	10	PM	0.0826214		0	EV	10	PM	5.26547		75	Wet	No	MPxCC	11.2972	0.0544839	1.9073	5.92316
Single	EV	4	23.2773		Single	EV	1	0.00242685		Single	EV	4	0.0669943		Single	EV	1	10.6728		17	irMPK4	PM	7.93466		17	irMPK4	PM	5.92008		17	irMPK4	2	PM	0.348482		17	irMPK4	2	PM	1.3403		0	Wet	No	EVxCC	21.3711	0.204258	6.01784	3.55129
Single	EV	6	24.1741		Single	EV	4	0.00165822		Single	EV	6	0.0726252		Single	EV	4	14.0375		17	irMPK4	PM	9.53123		17	irMPK4	PM	7.58138		17	irMPK4	6	PM	0.499255		17	irMPK4	6	PM	1.25719		25	Wet	No	EVxCC	22.0237	0.211079	5.94459	3.70482
Single	EV	9	27.1019		Single	EV	6	0.00177079		Single	EV	9	0.120826		Single	EV	6	13.6516		17	irMPK4	PM	9.17203		17	irMPK4	PM	6.46321		17	irMPK4	8	PM	0.392096		17	irMPK4	8	PM	1.41911		25	Wet	No	MPxCC	35.9823	0.6562	13.0168	2.7643
Mono	MPK4	1	24.7421		Mono	MPK4	1	0.0031604		Mono	MPK4	1	0.154597		Single	EV	9	9.97477		17	irMPK4	PM	9.02831		17	irMPK4	PM	6.71873		17	irMPK4	12	PM	0.432706		17	irMPK4	12	PM	1.34375		25	Wet	No	EVxCC	28.3138	0.10422	4.07455	6.94893
Mono	MPK4	1	26.7452		Mono	MPK4	1	0.00375737		Mono	MPK4	1	0.186198		Mono	MPK4	1	7.82879		50	irMPK4	PM	8.10993		50	irMPK4	PM	4.7222		50	irMPK4	9	PM	0.238349		50	irMPK4	9	PM	1.71741		25	Wet	No	MPxCC	34.8269	0.172312	5.87681	5.92615
Mono	MPK4	3	25.1306		Mono	MPK4	3	0.00375924		Mono	MPK4	3	0.190983		Mono	MPK4	1	7.11806		50	irMPK4	PM	6.75279		50	irMPK4	PM	5.14901		50	irMPK4	12	PM	0.255833		50	irMPK4	12	PM	1.31147		75	Wet	No	EVxCC	29.0588	0.200712	6.56174	4.42853
Mono	MPK4	3	22.2363		Mono	MPK4	3	0.00352267		Mono	MPK4	3	0.179043		Mono	MPK4	3	6.68503		83	irMPK4	PM	8.99417		83	irMPK4	PM	6.9964		83	irMPK4	2	PM	0.470313		83	irMPK4	2	PM	1.28554		75	Wet	No	MPxCC	35.7281	0.463438	10.4837	3.40796
Mono	MPK4	5	28.1977		Mono	MPK4	5	0.00305312		Mono	MPK4	5	0.218091		Mono	MPK4	3	6.31236		83	irMPK4	PM	12.3803		83	irMPK4	PM	8.40664		83	irMPK4	7	PM	0.560244		83	irMPK4	7	PM	1.47268		25	Wet	No	EVxCC	36.4131	0.342374	8.99293	4.04908
Mono	MPK4	5	21.4545		Mono	MPK4	9	0.0037353		Mono	MPK4	5	0.152435		Mono	MPK4	5	6.64624		83	irMPK4	PM	11.7603		83	irMPK4	PM	9.22396		83	irMPK4	9	PM	0.714365		83	irMPK4	9	PM	1.27497		25	Wet	No	MPxCC	41.2167	0.688984	12.3986	3.32431
Mono	MPK4	9	25.1305		Mono	MPK4	9	0.00319591		Mono	MPK4	9	0.18901		Mono	MPK4	5	7.02708		83	irMPK4	PM	10.6731		83	irMPK4	PM	9.06919		83	irMPK4	10	PM	0.663751		83	irMPK4	10	PM	1.17685		75	Wet	No	EVxCC	40.89	0.459559	10.4307	3.92017
Mono	MPK4	9	25.2113		Mono	EV	3	0.00161957		Mono	MPK4	9	0.153195		Mono	MPK4	9	6.72783		100	irMPK4	PM	10.5626		100	irMPK4	PM	6.7544		100	irMPK4	5	PM	0.378621		100	irMPK4	5	PM	1.56381		75	Wet	No	MPxCC	33.6429	0.219609	7.27345	4.62543
Mono	EV	3	22.7342		Mono	EV	3	0.00111182		Mono	EV	3	0.0686812		Mono	MPK4	9	7.88859		100	irMPK4	PM	10.1096		100	irMPK4	PM	7.75576		100	irMPK4	8	PM	0.481866		100	irMPK4	8	PM	1.3035		0	Wet	No	EVxCC	44.8984	0.808658	11.1952	4.01052
Mono	EV	3	19.9848		Mono	EV	6	0.00120971		Mono	EV	3	0.044183		Mono	EV	3	14.0372		100	irMPK4	PM	30.9222		100	irMPK4	PM	1.68675		100	irMPK4	9	PM	0.0459845		100	irMPK4	9	PM	18.3324		100	Wet	No	MPxCC	46.7394	1.08083	13.7273	3.40484
Mono	EV	6	20.5258		Mono	EV	6	0.00083306		Mono	EV	6	0.0505758		Mono	EV	3	17.9749		100	irMPK4	PM	38.1969		100	irMPK4	PM	2.8721		100	irMPK4	11	PM	0.0908267		100	irMPK4	11	PM	13.2993		100	Wet	No	MPxCC	50.4698	0.988407	13.3661	3.77597
Mono	EV	6	17.9784		Mono	EV	7	0.00125581		Mono	EV	6	0.0318466		Mono	EV	6	16.9675		0	EV	PM	73.3907		0	EV	PM	1.37873		0	EV	3	PM	0.0420447		0	EV	3	PM	53.2307		100	Wet	Yes	MPxEV	4.8167	0.0263568	1.37313	3.50783
Mono	EV	7	19.4649		Mono	EV	7	0.000387807		Mono	EV	7	0.0496641		Mono	EV	7	15.4999		0	EV	PM	69.442		0	EV	PM	0.57336		0	EV	6	PM	0.0162601		17	irMPK4	10	PM	14.5385		0	Wet	Yes	EV	25.9159	0.324315	8.19118	3.16388
Mono	EV	11	18.9445		Mono	EV	11	0.00121799		Mono	EV	11	0.0474758		Mono	EV	11	15.554		0	EV	PM	63.0826		0	EV	PM	-0.077407		0	EV	8	PM	-0.00202297		17	irMPK4	11	PM	11.0959		75	Wet	Yes	EV	11.9901	0.0374256	2.04737	5.85633
Mono	EV	11	19.1302		Mono	EV	11	0.00114162		Mono	EV	11	0.0444467		Mono	EV	11	16.757		0	EV	PM	30.9391		0	EV	PM	0.340823		0	EV	11	PM	0.00887088		50	irMPK4	1	PM	14.4052		75	Wet	Yes	MPxEV	8.51666	0.0237599	0.879719	9.68111
Mix	EV	4	19.8874		Mix	EV	4	0.00146878		Mix	EV	4	0.0573993		Mix	EV	4	13.5401		17	irMPK4	PM	31.914		17	irMPK4	PM	2.19514		17	irMPK4	10	PM	0.0653587		50	irMPK4	4	PM	11.5811		25	Wet	Yes	EV	20.9923	0.273521	9.28066	2.26194
Mix	MPK4	4	25.4179		Mix	MPK4	4	0.00400064		Mix	MPK4	4	0.192348		Mix	MPK4	4	6.35345		17	irMPK4	PM	37.8956		17	irMPK4	PM	3.41527		17	irMPK4	11	PM	0.107848		50	irMPK4	7	PM	7.90782		25	Wet	Yes	MPxEV	33.0049	0.722706	12.5764	2.62435
Mix	EV	10	22.3849		Mix	EV	10	0.00184121		Mix	EV	10	0.0789935		Mix	EV	10	12.1577		50	irMPK4	PM	33.1676		50	irMPK4	PM	2.30248		50	irMPK4	1	PM	0.0668042		50	irMPK4	10	PM	9.47648		100	Wet	Yes	MPxEV	28.269	0.0976772	4.03653	7.00328
Mix	MPK4	10	23.2523		Mix	MPK4	10	0.00379437		Mix	MPK4	10	0.180966		Mix	MPK4	10	6.1281		50	irMPK4	PM	35.6076		50	irMPK4	PM	3.07463		50	irMPK4	4	PM	0.0906737		83	irMPK4	4	PM	9.85274		0	Wet	Yes	EV	31.5641	0.963104	12.8341	2.4594
Mix	EV	11	19.0653		Mix	EV	11	0.0014559		Mix	EV	11	0.0570636		Mix	EV	11	13.0952		50	irMPK4	PM	30.4659		50	irMPK4	PM	3.85262		50	irMPK4	7	PM	0.119711		83	irMPK4	7	PM	9.45464		25	Wet	Yes	EV	41.1523	0.443642	10.0443	4.09709
Mix	MPK4	11	24.0959		Mix	MPK4	11	0.00412037		Mix	MPK4	11	0.195327		Mix	MPK4	11	5.848		50	irMPK4	PM	29.3508		50	irMPK4	PM	3.09723		50	irMPK4	10	PM	0.0959806		83	irMPK4	9	PM	10.7319		25	Wet	Yes	MPxEV	45.3277	0.805835	13.3563	3.39373
Mix	EV	12	18.4989		Mix	EV	12	0.00160779		Mix	EV	12	0.0616748		Mix	EV	12	11.5058		83	irMPK4	PM	29.086		83	irMPK4	PM	2.95207		83	irMPK4	4	PM	0.0902188		83	irMPK4	11	PM	8.6908		100	Wet	Yes	MPxEV	18.6174	0.0274703	1.27073	14.6509
Mix	MPK4	12	24.9498		Mix	MPK4	12	0.00403564		Mix	MPK4	12	0.193778		Mix	MPK4	12	6.18237		83	irMPK4	PM	36.1698		83	irMPK4	PM	3.82562		83	irMPK4	7	PM	0.12428		100	irMPK4	8	PM	9.47309		75	Wet	Yes	EV	39.2355	0.773452	13.4325	2.92093
																				83	irMPK4	PM	29.9912		83	irMPK4	PM	2.79459		83	irMPK4	9	PM	0.0843061		100	irMPK4	5	PM	14.6772		75	Wet	Yes	MPxEV	40.6533	1.21988	14.8591	2.73592
																				83	irMPK4	PM	31.89		83	irMPK4	PM	3.6694		83	irMPK4	11	PM	0.123997		100	irMPK4	7	PM	11.4632		25	Wet	Yes	EV	29.0651	0.0956951	3.65118	7.96045
																				100	irMPK4	PM	32.6296		100	irMPK4	PM	3.44445		100	irMPK4	8	PM	0.108481		100	irMPK4	10	PM	13.5893		25	Wet	Yes	MPxEV	26.5329	0.0667308	2.7197	9.75581
																				100	irMPK4	PM	35.9297		100	irMPK4	PM	2.448		100	irMPK4	5	PM	0.0758896		100	irMPK4	11	PM	9.74715		75	Wet	Yes	EV	34.0377	0.131828	4.60186	7.39652
																				100	irMPK4	PM	37.0104		100	irMPK4	PM	3.22864		100	irMPK4	7	PM	0.100713		100	irMPK4	12	PM	11.8713		75	Wet	Yes	MPxEV	40.8228	0.258228	7.36373	5.54376
																				100	irMPK4	PM	36.7553		100	irMPK4	PM	2.70472		100	irMPK4	10	PM	0.0755347		0	EV	4	PM	3.04054
																				100	irMPK4	PM	38.1378		100	irMPK4	PM	3.91271		100	irMPK4	11	PM	0.12871		0	EV	6	PM	4.19562
																				100	irMPK4	PM	39.481		100	irMPK4	PM	3.32574		100	irMPK4	12	PM	0.104467		0	EV	9	PM	8.333
																				0	EV	PM	16.7881		0	EV	PM	5.5214		0	EV	4	PM	0.334629		0	EV	10	PM	9.53543
																				0	EV	PM	9.92691		0	EV	PM	2.36602		0	EV	6	PM	0.117177		17	EV	2	PM	4.21987
																				0	EV	PM	11.3082		0	EV	PM	1.35704		0	EV	9	PM	0.0620716		17	EV	4	PM	8.59187
																				0	EV	PM	7.83537		0	EV	PM	0.821711		0	EV	10	PM	0.0341869		17	EV	6	PM	3.80166
																				17	EV	PM	13.4181		17	EV	PM	3.17973		17	EV	2	PM	0.152431		17	EV	8	PM	9.27797
																				17	EV	PM	9.40248		17	EV	PM	1.09435		17	EV	4	PM	0.0458518		17	EV	10	PM	4.40496
																				17	EV	PM	15.2103		17	EV	PM	4.00096		17	EV	6	PM	0.196265		17	EV	12	PM	4.41449
																				17	EV	PM	10.3445		17	EV	PM	1.11496		17	EV	8	PM	0.0469024		50	EV	5	PM	3.39438
																				17	EV	PM	12.2324		17	EV	PM	2.77695		17	EV	10	PM	0.127891		50	EV	9	PM	5.10004
																				17	EV	PM	12.5108		17	EV	PM	2.83403		17	EV	12	PM	0.128897		50	EV	12	PM	6.89494
																				50	EV	PM	12.3449		50	EV	PM	3.63687		50	EV	5	PM	0.169326		50	EV	7	PM	4.59623
																				50	EV	PM	9.22626		50	EV	PM	1.80906		50	EV	9	PM	0.0780004		50	EV	1	PM	4.94122
																				50	EV	PM	11.9757		50	EV	PM	1.73688		50	EV	12	PM	0.0705382		83	EV	2	PM	2.61253
																				50	EV	PM	13.8356		50	EV	PM	3.01021		50	EV	7	PM	0.131411		83	EV	7	PM	2.70955
																				50	EV	PM	13.25		50	EV	PM	2.68153		50	EV	1	PM	0.115143		83	EV	9	PM	4.11814
																				83	EV	PM	9.60151		83	EV	PM	3.67518		83	EV	2	PM	0.180626		83	EV	10	PM	2.07528
																				83	EV	PM	12.1967		83	EV	PM	4.50138		83	EV	7	PM	0.230451		100	irMPK4	5	PM	1.48144
																				83	EV	PM	11.64		83	EV	PM	2.82651		83	EV	9	PM	0.127618		100	irMPK4	8	PM	1.32873
																				83	EV	PM	12.1452		83	EV	PM	5.85233		83	EV	10	PM	0.331354		100	irMPK4	6	PM	11.5513
																				100	irMPK4	PM	10.3651		100	irMPK4	PM	6.99665		100	irMPK4	5	PM	0.409178		100	irMPK4	9	PM	10.8277
																				100	irMPK4	PM	9.95022		100	irMPK4	PM	7.48854		100	irMPK4	8	PM	0.418207		0	EV	3	PM	51.3798
																				100	irMPK4	PM	36.6437		100	irMPK4	PM	3.17227		100	irMPK4	6	PM	0.0911587		0	EV	6	PM	65.5131
																				100	irMPK4	PM	42.6163		100	irMPK4	PM	3.93586		100	irMPK4	9	PM	0.124916		0	EV	8	PM	77.7295
																				0	EV	PM	61.1171		0	EV	PM	1.18952		0	EV	3	PM	0.0360213		0	EV	11	PM	59.4054
																				0	EV	PM	68.1021		0	EV	PM	1.03952		0	EV	6	PM	0.0305906		17	EV	10	PM	39.7529
																				0	EV	PM	33.599		0	EV	PM	0.432255		0	EV	8	PM	0.011488		17	EV	11	PM	22.6413
																				0	EV	PM	35.8544		0	EV	PM	0.603555		0	EV	11	PM	0.0164504		17	EV	5	PM	56.4254
																				17	EV	PM	39.4152		17	EV	PM	0.991504		17	EV	10	PM	0.0260918		50	EV	1	PM	25.8555
																				17	EV	PM	36.7084		17	EV	PM	1.6213		17	EV	11	PM	0.0455522		50	EV	4	PM	14.8655
																				17	EV	PM	42.3646		17	EV	PM	0.750807		17	EV	5	PM	0.0199409		50	EV	7	PM	11.0092
																				50	EV	PM	37.8231		50	EV	PM	1.46286		50	EV	1	PM	0.0389081		50	EV	10	PM	22.2707
																				50	EV	PM	39.2777		50	EV	PM	2.64221		50	EV	4	PM	0.077624		83	EV	4	PM	19.3809
																				50	EV	PM	32.268		50	EV	PM	2.931		50	EV	7	PM	0.0906088		83	EV	7	PM	20.4011
																				50	EV	PM	34.7779		50	EV	PM	1.5616		50	EV	10	PM	0.0429217		83	EV	9	PM	32.6653
																				83	EV	PM	32.9126		83	EV	PM	1.6982		83	EV	4	PM	0.0456797		83	EV	11	PM	15.126
																				83	EV	PM	38.8662		83	EV	PM	1.9051		83	EV	7	PM	0.0523992		100	irMPK4	8	PM	8.66055
																				83	EV	PM	36.3385		83	EV	PM	1.11245		83	EV	9	PM	0.0291948		100	irMPK4	7	PM	10.0914
																				83	EV	PM	33.9791		83	EV	PM	2.24641		83	EV	11	PM	0.0656875		100	irMPK4	10	PM	13.1807
																				100	irMPK4	PM	31.062		100	irMPK4	PM	3.58661		100	irMPK4	8	PM	0.10633		100	irMPK4	11	PM	10.6449
																				100	irMPK4	PM	40.4541		100	irMPK4	PM	4.00877		100	irMPK4	7	PM	0.120663		100	irMPK4	12	PM	12.769
																				100	irMPK4	PM	37.0069		100	irMPK4	PM	2.80766		100	irMPK4	10	PM	0.0884892		0	EV	4	PM	4.07667
																				100	irMPK4	PM	43.6886		100	irMPK4	PM	4.1042		100	irMPK4	11	PM	0.133643		0	EV	6	PM	10.9527
																				100	irMPK4	PM	34.5639		100	irMPK4	PM	2.70687		100	irMPK4	12	PM	0.0827053		0	EV	9	PM	5.87815
																				0	EV	PM	10.6159		0	EV	PM	2.60408		0	EV	4	PM	0.130865		0	EV	10	PM	7.04988
																				0	EV	PM	12.0022		0	EV	PM	1.09582		0	EV	6	PM	0.0472858		17	EV	2	PM	11.238
																				0	EV	PM	13.8205		0	EV	PM	2.35116		0	EV	9	PM	0.110111		17	EV	8	PM	5.57092
																				0	EV	PM	16.9747		0	EV	PM	2.40781		0	EV	10	PM	0.113579		50	EV	5	PM	5.77748
																				17	EV	PM	9.21191		17	EV	PM	0.81971		17	EV	2	PM	0.0345917		50	EV	9	PM	9.28626
																				17	EV	PM	9.97867		17	EV	PM	1.79121		17	EV	8	PM	0.080229		50	EV	7	PM	3.01443
																				50	EV	PM	12.5716		50	EV	PM	2.17596		50	EV	5	PM	0.0940427		83	EV	2	PM	2.54048
																				50	EV	PM	10.5934		50	EV	PM	1.14076		50	EV	9	PM	0.0448492		83	EV	7	PM	3.62279
																				50	EV	PM	13.2331		50	EV	PM	4.38993		50	EV	7	PM	0.20913		83	EV	9	PM	5.58039
																				83	EV	PM	13.7867		83	EV	PM	5.42681		83	EV	2	PM	0.28974		83	EV	10	PM	28.7825
																				83	EV	PM	13.2427		83	EV	PM	3.65537		83	EV	7	PM	0.176832		100	irMPK4	5	PM	1.37459
																				83	EV	PM	7.89861		83	EV	PM	1.41542		83	EV	9	PM	0.0592401		100	irMPK4	8	PM	10.9293
																				100	irMPK4	PM	13.8831		83	EV	PM	8.75155		100	irMPK4	8	PM	0.112563		100	irMPK4	6	PM	10.9833
																				100	irMPK4	PM	37.4197		100	irMPK4	PM	10.0998		100	irMPK4	6	PM	0.10972		100	irMPK4	9	PM	9.74088
																				100	irMPK4	PM	39.471		100	irMPK4	PM	3.4238		100	irMPK4	9	PM	0.139458		100	irMPK4	11	PM	10.2905
																				100	irMPK4	PM	39.923		100	irMPK4	PM	3.59373		100	irMPK4	11	PM	0.118027		0	EV	8	PM	41.6409
																				100	irMPK4	PM	39.9883		100	irMPK4	PM	4.0985		0	EV	3	PM	0.00985731		0	EV	11	PM	43.2721
																				0	EV	PM	70.1942		100	irMPK4	PM	3.88596		0	EV	6	PM	0.00518774		17	EV	3	PM	50.0919
																				0	EV	PM	65.9465		0	EV	PM	0.354959		0	EV	8	PM	0.0268093		17	EV	11	PM	26.5717
																				0	EV	PM	40.9728		0	EV	PM	0.195448		0	EV	11	PM	0.0207658		17	EV	12	PM	73.2826
																				0	EV	PM	33.3425		0	EV	PM	0.983956		17	EV	3	PM	0.0203296		17	EV	5	PM	42.1942
																				17	EV	PM	37.8402		0	EV	PM	0.770531		17	EV	11	PM	0.0371995		17	EV	4	PM	34.9537
																				17	EV	PM	35.7806		17	EV	PM	0.755417		17	EV	12	PM	0.0131132		50	EV	1	PM	18.7677
																				17	EV	PM	36.6982		17	EV	PM	1.34657		17	EV	5	PM	0.0261136		50	EV	4	PM	12.8742
																				17	EV	PM	41.8068		17	EV	PM	0.500776		17	EV	4	PM	0.0343185		50	EV	7	PM	14.385
																				17	EV	PM	45.1681		17	EV	PM	0.990818		50	EV	1	PM	0.0606178		50	EV	10	PM	10.7649
																				50	EV	PM	39.5449		17	EV	PM	1.29223		50	EV	4	PM	0.0965588		83	EV	4	PM	19.785
																				50	EV	PM	40.3604		50	EV	PM	2.10707		50	EV	7	PM	0.0586257		83	EV	7	PM	10.2427
																				50	EV	PM	30.6228		50	EV	PM	3.13498		50	EV	10	PM	0.0974859		83	EV	9	PM	20.3304
																				50	EV	PM	34.2742		50	EV	PM	2.1288		83	EV	4	PM	0.0480112		83	EV	11	PM	13.3862
																				83	EV	PM	34.4337		50	EV	PM	3.18389		83	EV	7	PM	0.101792		100	irMPK4	8	PM	12.7561
																				83	EV	PM	33.9892		83	EV	PM	1.7404		83	EV	9	PM	0.0468365		100	irMPK4	11	PM	10.9066
																				83	EV	PM	33.8483		83	EV	PM	3.31838		83	EV	11	PM	0.0614867		0	EV	4	PM	9.88523
																				83	EV	PM	28.3169		83	EV	PM	1.66491		100	irMPK4	8	PM	0.0817856		0	EV	6	PM	7.54899
																				100	irMPK4	PM	34.8273		83	EV	PM	2.11537		100	irMPK4	11	PM	0.112479		0	EV	9	PM	15.0656
																				100	irMPK4	PM	39.572		100	irMPK4	PM	2.73025		0	EV	4	PM	0.0485489		0	EV	10	PM	9.51769
																				0	EV	PM	10.7268		100	irMPK4	PM	3.62825		0	EV	6	PM	0.0295297		17	irMPK4	2	PM	1.30523
																				0	EV	PM	5.25423		0	EV	PM	1.08514		0	EV	9	PM	0.00786895		17	irMPK4	4	PM	1.61868
																				0	EV	PM	2.65096		0	EV	PM	0.696018		0	EV	10	PM	0.0390106		17	irMPK4	8	PM	1.33195
																				0	EV	PM	8.77175		0	EV	PM	0.17596		17	irMPK4	2	PM	0.534657		17	irMPK4	10	PM	1.34801
																				17	irMPK4	PM	10.4281		0	EV	PM	0.921626		17	irMPK4	4	PM	0.450665		50	irMPK4	5	PM	1.51111
																				17	irMPK4	PM	11.1619		17	irMPK4	PM	7.98954		17	irMPK4	8	PM	0.16846		50	irMPK4	7	PM	1.27105
																				17	irMPK4	PM	4.73158		17	irMPK4	PM	6.8957		17	irMPK4	10	PM	0.478909		50	irMPK4	1	PM	1.33375
																				17	irMPK4	PM	10.0556		17	irMPK4	PM	3.55236		50	irMPK4	5	PM	0.507893		83	irMPK4	2	PM	1.35558
																				50	irMPK4	PM	12.6836		17	irMPK4	PM	7.45961		50	irMPK4	7	PM	0.327954		83	irMPK4	7	PM	1.10242
																				50	irMPK4	PM	7.55275		50	irMPK4	PM	8.39353		50	irMPK4	1	PM	0.275569		83	irMPK4	9	PM	1.29881
																				50	irMPK4	PM	6.97946		50	irMPK4	PM	5.94213		83	irMPK4	2	PM	0.436481		83	irMPK4	10	PM	1.45176
																				83	irMPK4	PM	9.36552		50	irMPK4	PM	5.23295		83	irMPK4	7	PM	0.692153		100	irMPK4	5	PM	1.4635
																				83	irMPK4	PM	9.45228		83	irMPK4	PM	6.90889		83	irMPK4	9	PM	0.370391		100	irMPK4	8	PM	11.3892
																				83	irMPK4	PM	7.65974		83	irMPK4	PM	8.57415		83	irMPK4	10	PM	0.485328		100	irMPK4	6	PM	9.10316
																				83	irMPK4	PM	10.7344		83	irMPK4	PM	5.89749		100	irMPK4	5	PM	0.211445		0	EV	8	PM	58.2833
																				100	irMPK4	PM	6.71856		83	irMPK4	PM	7.39408		100	irMPK4	8	PM	0.101343		0	EV	11	PM	34.6085
																				100	irMPK4	PM	35.9283		100	irMPK4	PM	4.59073		100	irMPK4	6	PM	0.141325		17	irMPK4	3	PM	13.3695
																				100	irMPK4	PM	39.0616		100	irMPK4	PM	3.1546		0	EV	3	PM	0.0135997		50	irMPK4	1	PM	13.4845
																				0	EV	PM	70.4913		100	irMPK4	PM	4.291		0	EV	6	PM	0.0150954		50	irMPK4	4	PM	9.66445
																				0	EV	PM	69.0688		0	EV	PM	0.483782		0	EV	8	PM	0.0169203		50	irMPK4	7	PM	8.31816
																				0	EV	PM	35.3746		0	EV	PM	0.543256		0	EV	11	PM	0.0335929		50	irMPK4	10	PM	7.71177
																				0	EV	PM	42.0462		0	EV	PM	0.606943		17	irMPK4	3	PM	0.0735908		83	irMPK4	4	PM	9.14051
																				17	irMPK4	PM	32.604		0	EV	PM	1.21491		50	irMPK4	1	PM	0.0882285		83	irMPK4	7	PM	9.00299
																				17	irMPK4	PM	31.9681		17	irMPK4	PM	2.43868		50	irMPK4	4	PM	0.122383		83	irMPK4	9	PM	8.97441
																				50	irMPK4	PM	39.0776		17	irMPK4	PM	0.644448		50	irMPK4	7	PM	0.129614		83	irMPK4	11	PM	7.07358
																				50	irMPK4	PM	38.2971		50	irMPK4	PM	2.89797		50	irMPK4	10	PM	0.134312		100	irMPK4	8	PM	10.2317
																				50	irMPK4	PM	33.6388		50	irMPK4	PM	3.96267		83	irMPK4	4	PM	0.117896		100	irMPK4	5	PM	10.7272
																				50	irMPK4	PM	32.0779		50	irMPK4	PM	4.04402		83	irMPK4	7	PM	0.114137		100	irMPK4	12	PM	10.5732
																				83	irMPK4	PM	33.1888		50	irMPK4	PM	4.1596		83	irMPK4	9	PM	0.117662
																				83	irMPK4	PM	33.4611		83	irMPK4	PM	3.63096		83	irMPK4	11	PM	0.15711
																				83	irMPK4	PM	32.5282		83	irMPK4	PM	3.71666		100	irMPK4	8	PM	0.131592
																				83	irMPK4	PM	32.4496		83	irMPK4	PM	3.62455		100	irMPK4	5	PM	0.1036
																				100	irMPK4	PM	41.3601		83	irMPK4	PM	4.58743		100	irMPK4	12	PM	0.115608
																				100	irMPK4	PM	37.2236		100	irMPK4	PM	4.04234
																				100	irMPK4	PM	39.3596		100	irMPK4	PM	3.47003
																									100	irMPK4	PM	3.72259
