# Supplementary material for: Determining the scale at which variation in a single gene changes population yields
Source: eLife. 2020 Feb 14;9:e53517. doi: 10.7554/eLife.53517 (PMC7136025; doi:10.7554/eLife.53517)
Supplement: Figure 6—figure supplement 1—source data 1. [file elife-53517-fig6-figsupp1-data1.xlsx]

## Sheet: Feuil1
Figure 6-figure supplement 1B						Figure 6-figure supplement 1C
Potting	AMF Interaction	Genotype	Days post potting	Water Loss (g)		Potting	AMF Interaction	Genotype	Days post potting	Water Loss (g)
Single	No	EV/EV	17	31.62		Single	No	EV/EV	20	32.26
Single	No	EV/MPK4	17	28.18		Single	No	EV/MPK4	20	29.5
Single	No	MPK4/MPK4	17	30.2		Single	No	MPK4/MPK4	20	31.94
Comp	Yes	MPK4/MPK4	17	35.44		Comp	Yes	MPK4/MPK4	20	35.1
Single	Yes	MPK4/MPK4	17	37.6		Single	Yes	MPK4/MPK4	20	42
Comp	Yes	EV/EV	17	34.9		Comp	Yes	EV/EV	20	37.94
Single	No	MPK4/MPK4	17	33.46		Single	No	MPK4/MPK4	20	34.82
Single	No	EV/MPK4	17	28.66		Single	No	EV/MPK4	20	28.08
Comp	Yes	MPK4/MPK4	17	35.3		Comp	Yes	MPK4/MPK4	20	36.54
Comp	No	EV/EV	17	33.6		Comp	No	EV/EV	20	35.52
Comp	No	MPK4/MPK4	17	32.54		Comp	No	MPK4/MPK4	20	33.3
Single	Yes	MPK4/MPK4	17	34.9		Single	Yes	MPK4/MPK4	20	34.94
Single	No	MPK4/MPK4	17	30.98		Single	No	MPK4/MPK4	20	32.26
Comp	Yes	EV/EV	17	36.16		Comp	Yes	EV/EV	20	36.56
Comp	No	EV/EV	17	34.74		Comp	No	EV/EV	20	36.16
Single	Yes	MPK4/MPK4	17	32.88		Single	Yes	MPK4/MPK4	20	30.54
Single	Yes	EV/MPK4	17	33.2		Single	Yes	EV/MPK4	20	31.76
Comp	Yes	EV/EV	17	33.54		Comp	Yes	EV/EV	20	32.06
Single	Yes	EV/EV	17	30.68		Single	Yes	EV/EV	20	28.4
Comp	No	EV/MPK4	17	32.82		Comp	No	EV/MPK4	20	34.22
Comp	Yes	EV/MPK4	17	31.86		Comp	Yes	EV/MPK4	20	32.26
Single	No	EV/EV	17	34.42		Single	No	EV/EV	20	34.24
Comp	No	EV/EV	17	35.06		Comp	No	EV/EV	20	38.16
Single	Yes	EV/EV	17	35.6		Single	Yes	EV/EV	20	35.4
Comp	Yes	EV/MPK4	17	32.98		Comp	Yes	EV/MPK4	20	32.64
Comp	No	MPK4/MPK4	17	33.08		Comp	No	MPK4/MPK4	20	34.8
Comp	No	EV/MPK4	17	30.46		Comp	No	EV/MPK4	20	31.22
Single	Yes	EV/MPK4	17	31.26		Single	Yes	EV/MPK4	20	29.84
Single	No	MPK4/MPK4	17	34.54		Single	No	MPK4/MPK4	20	39.16
Single	No	EV/MPK4	17	36.06		Single	No	EV/MPK4	20	37.56
Comp	Yes	MPK4/MPK4	17	36.12		Comp	Yes	MPK4/MPK4	20	38.82
Single	Yes	MPK4/MPK4	17	29.52		Single	Yes	MPK4/MPK4	20	29.52
Comp	No	MPK4/MPK4	17	34.46		Comp	No	MPK4/MPK4	20	37.9
Comp	No	EV/EV	17	33.86		Comp	No	EV/EV	20	34.98
Comp	Yes	EV/MPK4	17	35.58		Comp	Yes	EV/MPK4	20	36.64
Comp	No	EV/MPK4	17	33.02		Comp	No	EV/MPK4	20	33.68
Comp	No	MPK4/MPK4	17	37.42		Comp	No	MPK4/MPK4	20	41.38
Single	No	EV/MPK4	17	28.46		Single	No	EV/MPK4	20	28.9
Single	Yes	EV/EV	17	33.28		Single	Yes	EV/EV	20	34.46
Single	Yes	EV/MPK4	17	27.96		Single	Yes	EV/MPK4	20	27.9
Comp	Yes	MPK4/MPK4	17	37.22		Comp	Yes	MPK4/MPK4	20	40.02
Single	No	EV/EV	17	34.24		Single	No	EV/EV	20	35.88
Comp	Yes	EV/MPK4	17	28.84		Comp	Yes	EV/MPK4	20	28.7
Comp	No	EV/MPK4	17	31.12		Comp	No	EV/MPK4	20	31.48
Comp	Yes	EV/EV	17	32.18		Comp	Yes	EV/EV	20	32.64
Single	Yes	EV/MPK4	17	27.22		Single	Yes	EV/MPK4	20	26.04
Single	Yes	EV/EV	17	32.5		Single	Yes	EV/EV	20	33.04
Comp	Yes	MPK4/MPK4	17	35.92		Comp	Yes	MPK4/MPK4	20	38.9
Comp	No	EV/EV	17	33.06		Comp	No	EV/EV	20	32.94
Single	No	EV/EV	17	32.2		Single	No	EV/EV	20	32.68
Single	No	MPK4/MPK4	17	27.84		Single	No	MPK4/MPK4	20	27.3
Comp	Yes	EV/EV	17	29.24		Comp	Yes	EV/EV	20	29.2
Comp	No	MPK4/MPK4	17	33.54		Comp	No	MPK4/MPK4	20	34.94
Comp	No	EV/EV	17	28.2		Comp	No	EV/EV	20	28.32
Single	No	EV/EV	17	28.98		Single	No	EV/EV	20	29.3
Single	No	MPK4/MPK4	17	30.8		Single	No	MPK4/MPK4	20	30.88
Comp	Yes	EV/EV	17	32.16		Comp	Yes	EV/EV	20	32.08
Single	Yes	EV/EV	17	30.16		Single	Yes	EV/EV	20	30.24
Comp	No	EV/MPK4	17	28.92		Comp	No	EV/MPK4	20	29.12
Single	No	EV/MPK4	17	26.72		Single	No	EV/MPK4	20	26.48
Single	Yes	MPK4/MPK4	17	29.72		Single	Yes	MPK4/MPK4	20	30.6
Single	Yes	EV/MPK4	17	28.18		Single	Yes	EV/MPK4	20	26.68
Comp	Yes	EV/MPK4	17	31.84		Comp	Yes	EV/MPK4	20	30.78
Single	Yes	EV/MPK4	17	29		Single	Yes	EV/MPK4	20	27.78
Single	Yes	EV/EV	17	26.86		Single	Yes	EV/EV	20	23.88
Single	No	EV/MPK4	17	25.44		Single	No	EV/MPK4	20	24.8
Single	Yes	MPK4/MPK4	17	30.52		Single	Yes	MPK4/MPK4	20	30.26
Comp	Yes	MPK4/MPK4	17	31.56		Comp	Yes	MPK4/MPK4	20	30.76
Comp	No	EV/MPK4	17	29.36		Comp	No	EV/MPK4	20	30
Comp	Yes	EV/MPK4	17	30.58		Comp	Yes	EV/MPK4	20	28.4
Single	Yes	EV/MPK4	17	32.84		Single	Yes	EV/MPK4	20	32.06
Single	Yes	EV/EV	17	30.68		Single	Yes	EV/EV	20	28.28
Comp	No	MPK4/MPK4	17	29.7		Comp	No	MPK4/MPK4	20	29.26
Single	No	EV/MPK4	17	29.72		Single	No	EV/MPK4	20	29.36
Comp	No	EV/MPK4	17	31.18		Comp	No	EV/MPK4	20	31.22
Single	Yes	MPK4/MPK4	17	31.56		Single	Yes	MPK4/MPK4	20	31.7
Single	No	EV/EV	20	32.26		Single	No	EV/EV	29	34.3
Single	No	EV/MPK4	20	29.5		Single	No	EV/MPK4	29	31.76
Single	No	MPK4/MPK4	20	31.94		Single	No	MPK4/MPK4	29	33.4
Comp	Yes	MPK4/MPK4	20	35.1		Comp	Yes	MPK4/MPK4	29	32.48
Single	Yes	MPK4/MPK4	20	42		Single	Yes	MPK4/MPK4	29	37.34
Comp	Yes	EV/EV	20	37.94		Comp	Yes	EV/EV	29	35.54
Single	No	MPK4/MPK4	20	34.82		Single	No	MPK4/MPK4	29	36.48
Single	No	EV/MPK4	20	28.08		Single	No	EV/MPK4	29	29.52
Comp	Yes	MPK4/MPK4	20	36.54		Comp	Yes	MPK4/MPK4	29	35.3
Comp	No	EV/EV	20	35.52		Comp	No	EV/EV	29	34.92
Comp	No	MPK4/MPK4	20	33.3		Comp	No	MPK4/MPK4	29	35.72
Single	Yes	MPK4/MPK4	20	34.94		Single	Yes	MPK4/MPK4	29	35.4
Single	No	MPK4/MPK4	20	32.26		Single	No	MPK4/MPK4	29	35.72
Comp	Yes	EV/EV	20	36.56		Comp	Yes	EV/EV	29	34.3
Comp	No	EV/EV	20	36.16		Comp	No	EV/EV	29	36.68
Single	Yes	MPK4/MPK4	20	30.54		Single	Yes	MPK4/MPK4	29	28.88
Single	Yes	EV/MPK4	20	31.76		Single	Yes	EV/MPK4	29	31.28
Comp	Yes	EV/EV	20	32.06		Comp	Yes	EV/EV	29	34.24
Single	Yes	EV/EV	20	28.4		Single	Yes	EV/EV	29	30
Comp	No	EV/MPK4	20	34.22		Comp	No	EV/MPK4	29	31.68
Comp	Yes	EV/MPK4	20	32.26		Comp	Yes	EV/MPK4	29	25.44
Single	No	EV/EV	20	34.24		Single	No	EV/EV	29	34.58
Comp	No	EV/EV	20	38.16		Comp	No	EV/EV	29	37.36
Single	Yes	EV/EV	20	35.4		Single	Yes	EV/EV	29	34.82
Comp	Yes	EV/MPK4	20	32.64		Comp	Yes	EV/MPK4	29	31.74
Comp	No	MPK4/MPK4	20	34.8		Comp	No	MPK4/MPK4	29	34.82
Comp	No	EV/MPK4	20	31.22		Comp	No	EV/MPK4	29	34.64
Single	Yes	EV/MPK4	20	29.84		Single	Yes	EV/MPK4	29	29.04
Single	No	MPK4/MPK4	20	39.16		Single	No	MPK4/MPK4	29	39.94
Single	No	EV/MPK4	20	37.56		Single	No	EV/MPK4	29	39.78
Comp	Yes	MPK4/MPK4	20	38.82		Comp	Yes	MPK4/MPK4	29	38.24
Single	Yes	MPK4/MPK4	20	29.52		Single	Yes	MPK4/MPK4	29	32.42
Comp	No	MPK4/MPK4	20	37.9		Comp	No	MPK4/MPK4	29	38.66
Comp	No	EV/EV	20	34.98		Comp	No	EV/EV	29	38.1
Comp	Yes	EV/MPK4	20	36.64		Comp	Yes	EV/MPK4	29	31.66
Comp	No	EV/MPK4	20	33.68		Comp	No	EV/MPK4	29	36.24
Comp	No	MPK4/MPK4	20	41.38		Comp	No	MPK4/MPK4	29	41.96
Single	No	EV/MPK4	20	28.9		Single	No	EV/MPK4	29	29.86
Single	Yes	EV/EV	20	34.46		Single	Yes	EV/EV	29	32.96
Single	Yes	EV/MPK4	20	27.9		Single	Yes	EV/MPK4	29	29.62
Comp	Yes	MPK4/MPK4	20	40.02		Comp	Yes	MPK4/MPK4	29	33.66
Single	No	EV/EV	20	35.88		Single	No	EV/EV	29	36.32
Comp	Yes	EV/MPK4	20	28.7		Comp	Yes	EV/MPK4	29	29.12
Comp	No	EV/MPK4	20	31.48		Comp	No	EV/MPK4	29	31.94
Comp	Yes	EV/EV	20	32.64		Comp	Yes	EV/EV	29	35.54
Single	Yes	EV/MPK4	20	26.04		Single	Yes	EV/MPK4	29	24.08
Single	Yes	EV/EV	20	33.04		Single	Yes	EV/EV	29	32.54
Comp	Yes	MPK4/MPK4	20	38.9		Comp	Yes	MPK4/MPK4	29	37.78
Comp	No	EV/EV	20	32.94		Comp	No	EV/EV	29	36.78
Single	No	EV/EV	20	32.68		Single	No	EV/EV	29	34.8
Single	No	MPK4/MPK4	20	27.3		Single	No	MPK4/MPK4	29	31.46
Comp	Yes	EV/EV	20	29.2		Comp	Yes	EV/EV	29	30.66
Comp	No	MPK4/MPK4	20	34.94		Comp	No	MPK4/MPK4	29	38.22
Comp	No	EV/EV	20	28.32		Comp	No	EV/EV	29	29.32
Single	No	EV/EV	20	29.3		Single	No	EV/EV	29	33.36
Single	No	MPK4/MPK4	20	30.88		Single	No	MPK4/MPK4	29	34.16
Comp	Yes	EV/EV	20	32.08		Comp	Yes	EV/EV	29	32.78
Single	Yes	EV/EV	20	30.24		Single	Yes	EV/EV	29	33.84
Comp	No	EV/MPK4	20	29.12		Comp	No	EV/MPK4	29	31.12
Single	No	EV/MPK4	20	26.48		Single	No	EV/MPK4	29	31.06
Single	Yes	MPK4/MPK4	20	30.6		Single	Yes	MPK4/MPK4	29	33.34
Single	Yes	EV/MPK4	20	26.68		Single	Yes	EV/MPK4	29	29.34
Comp	Yes	EV/MPK4	20	30.78		Comp	Yes	EV/MPK4	29	33.58
Single	Yes	EV/MPK4	20	27.78		Single	Yes	EV/MPK4	29	27.36
Single	Yes	EV/EV	20	23.88		Single	Yes	EV/EV	29	21.86
Single	No	EV/MPK4	20	24.8		Single	No	EV/MPK4	29	26.76
Single	Yes	MPK4/MPK4	20	30.26		Single	Yes	MPK4/MPK4	29	27.64
Comp	Yes	MPK4/MPK4	20	30.76		Comp	Yes	MPK4/MPK4	29	31.7
Comp	No	EV/MPK4	20	30		Comp	No	EV/MPK4	29	30.58
Comp	Yes	EV/MPK4	20	28.4		Comp	Yes	EV/MPK4	29	29.5
Single	Yes	EV/MPK4	20	32.06		Single	Yes	EV/MPK4	29	35.68
Single	Yes	EV/EV	20	28.28		Single	Yes	EV/EV	29	31.62
Comp	No	MPK4/MPK4	20	29.26		Comp	No	MPK4/MPK4	29	31.32
Single	No	EV/MPK4	20	29.36		Single	No	EV/MPK4	29	31.86
Comp	No	EV/MPK4	20	31.22		Comp	No	EV/MPK4	29	32.7
Single	Yes	MPK4/MPK4	20	31.7		Single	Yes	MPK4/MPK4	29	34.02
