# Supplementary material for: Determining the scale at which variation in a single gene changes population yields
Source: eLife. 2020 Feb 14;9:e53517. doi: 10.7554/eLife.53517 (PMC7136025; doi:10.7554/eLife.53517)
Supplement: Figure 6—source data 1. [file elife-53517-fig6-data1.xlsx]

## Sheet: Feuil1
Figure 6B Panel 1					Figure 6B Panel 2					Figure 6B Panel 3					Figure 6B Panel 4					Figure 6C					Figure 6D					Figure 6E
Potting	Genotype	Pot ID	Assimilation (CO2 umol/m2s)		Potting	Genotype	Pot ID	Transpiration (H2O mmol/m2s)		Potting	Genotype	Pot ID	Stomatal Conductance (mmol/m2s)		Potting	Genotype	Pot ID	WUE (CO2/H2O)		Potting	Genotype	Pot ID	Wet Shoot Biomass (g)		Potting	Genotype	Pot ID	Wet Root Biomass (g)		Potting	Genotype	Pot ID	Total Fitness Correlates (#)
Single	EV/EV	1	11.5656		Single	EV/EV	1	3.50053		Single	EV/EV	1	0.313182		Single	EV/EV	1	3.30396		Single	EV/EV	1	3.467		Single	MPK4/MPK4	15	15.3		Single	EV/EV	1	8
Single	EV/EV	2	14.8947		Single	EV/EV	2	4.23005		Single	EV/EV	2	0.24247		Single	EV/EV	2	3.52117		Single	MPK4/MPK4	15	2.254		Comp	MPK4/MPK4	23	37.86		Single	MPK4/MPK4	15	8
Single	EV/EV	4	13.7253		Single	EV/EV	4	3.5972		Single	EV/EV	4	0.247284		Single	EV/EV	4	3.81553		Comp	MPK4/MPK4	23	1.881		Single	MPK4/MPK4	16	22.54		Single	MPK4/MPK4	57	7
Single	EV/EV	5	14.6187		Single	EV/EV	5	4.39141		Single	EV/EV	5	0.409978		Single	EV/EV	5	3.32894		Single	MPK4/MPK4	16	2.345		Comp	EV/MPK4	38	35.68		Comp	EV/EV	50	10
Single	EV/EV	6	9.756		Single	EV/EV	6	3.01073		Single	EV/EV	6	0.226771		Single	EV/EV	6	3.24041		Comp	EV/MPK4	38	2.377		Comp	MPK4/MPK4	24	33.82		Comp	MPK4/MPK4	23	11
Comp	EV/EV	10	12.0349		Comp	EV/EV	8	3.14214		Comp	EV/EV	8	0.153665		Comp	EV/EV	8	2.39499		Comp	MPK4/MPK4	24	1.839		Single	EV/MPK4	31	20.68		Single	MPK4/MPK4	16	10
Comp	EV/EV	11	8.17634		Comp	EV/EV	10	4.26461		Comp	EV/EV	10	0.217368		Comp	EV/EV	10	2.82204		Single	EV/MPK4	31	3.187		Single	EV/EV	4	24.72		Single	EV/MPK4	30	10
Comp	EV/EV	12	13.1772		Comp	EV/EV	12	3.67709		Comp	EV/EV	12	0.353446		Comp	EV/EV	12	3.58361		Single	EV/EV	4	4.268		Comp	EV/EV	12	38.3		Single	MPK4/MPK4	58	7
Single	MPK4/MPK4	15	18.3923		Comp	EV/EV	13	4.98767		Single	MPK4/MPK4	15	0.79529		Comp	EV/EV	13	3.03159		Comp	EV/MPK4	39	2.487		Single	EV/EV	5	20.82		Comp	EV/MPK4	80	6
Single	MPK4/MPK4	16	19.508		Single	MPK4/MPK4	15	7.58697		Single	MPK4/MPK4	16	0.818284		Single	MPK4/MPK4	15	2.42419		Comp	EV/EV	12	2.616		Single	MPK4/MPK4	19	19.16		Comp	EV/MPK4	38	7
Single	MPK4/MPK4	17	21.8016		Single	MPK4/MPK4	16	7.88839		Single	MPK4/MPK4	19	0.756441		Single	MPK4/MPK4	16	2.473		Single	EV/EV	5	3.621		Comp	MPK4/MPK4	27	32.76		Comp	MPK4/MPK4	24	12
Single	MPK4/MPK4	18	18.1305		Single	MPK4/MPK4	18	8.07174		Single	MPK4/MPK4	20	0.814666		Single	MPK4/MPK4	17	2.33981		Single	MPK4/MPK4	19	2.223		Comp	EV/EV	13	46.88		Single	EV/MPK4	31	13
Single	MPK4/MPK4	19	22.253		Single	MPK4/MPK4	19	7.17455		Comp	MPK4/MPK4	22	0.535054		Single	MPK4/MPK4	18	2.24617		Comp	MPK4/MPK4	27	1.707		Single	EV/EV	6	18.16		Single	EV/EV	45	18
Single	MPK4/MPK4	20	21.2531		Single	MPK4/MPK4	20	7.53049		Comp	MPK4/MPK4	23	0.796113		Single	MPK4/MPK4	19	3.10165		Comp	EV/EV	13	1.93		Single	MPK4/MPK4	20	21.24		Single	EV/MPK4	73	11
Comp	MPK4/MPK4	22	15.7934		Comp	MPK4/MPK4	22	7.00756		Comp	MPK4/MPK4	24	0.704121		Single	MPK4/MPK4	20	2.82227		Single	EV/EV	6	4.055		Single	EV/MPK4	35	20.88		Comp	MPK4/MPK4	66	6
Comp	MPK4/MPK4	23	16.1246		Comp	MPK4/MPK4	23	6.65357		Comp	MPK4/MPK4	25	0.643225		Comp	MPK4/MPK4	22	2.25376		Single	MPK4/MPK4	20	2.452		Single	EV/MPK4	34	20		Single	EV/EV	4	15
Comp	MPK4/MPK4	24	15.9932		Comp	MPK4/MPK4	24	7.00914		Comp	MPK4/MPK4	26	0.630429		Comp	MPK4/MPK4	23	2.42345		Comp	EV/MPK4	42	1.643		Comp	EV/MPK4	41	35.68		Comp	EV/MPK4	81	6
Comp	MPK4/MPK4	25	18.0245		Comp	MPK4/MPK4	27	5.7484		Comp	MPK4/MPK4	27	0.597465		Comp	MPK4/MPK4	24	2.28176		Single	EV/MPK4	35	3.524		Comp	MPK4/MPK4	26	27.52		Comp	EV/MPK4	39	5
Comp	MPK4/MPK4	26	17.9737		Single	EV/MPK4	29	4.43158		Single	EV/MPK4	29	0.360579		Comp	MPK4/MPK4	25	1.83111		Comp	EV/MPK4	41	2.482		Single	EV/MPK4	33	21.74		Comp	EV/EV	53	8
Single	EV/MPK4	29	13.1411		Single	EV/MPK4	30	3.60341		Single	EV/MPK4	30	0.308116		Comp	MPK4/MPK4	26	2.06339		Comp	MPK4/MPK4	26	1.254		Comp	EV/MPK4	40	37.58		Single	EV/MPK4	74	8
Single	EV/MPK4	30	13.8716		Single	EV/MPK4	31	4.49639		Single	EV/MPK4	31	0.370128		Comp	MPK4/MPK4	27	1.99439		Single	EV/MPK4	33	3.738		Single	MPK4/MPK4	18	18.32		Single	EV/EV	46	11
Single	EV/MPK4	31	15.9123		Single	EV/MPK4	32	3.69683		Single	EV/MPK4	32	0.180993		Single	EV/MPK4	29	2.96534		Comp	EV/MPK4	40	2.77		Single	EV/MPK4	32	20.44		Comp	MPK4/MPK4	68	10
Single	EV/MPK4	32	12.2129		Single	EV/MPK4	34	3.67206		Single	EV/MPK4	33	0.318284		Single	EV/MPK4	30	3.84958		Single	MPK4/MPK4	18	2.327		Comp	EV/EV	11	44.54		Comp	EV/EV	12	7
Single	EV/MPK4	33	18.1117		Single	EV/MPK4	35	3.19647		Single	EV/MPK4	34	0.286663		Single	EV/MPK4	31	3.53891		Single	EV/MPK4	32	3.758		Comp	MPK4/MPK4	25	36.38		Single	EV/EV	5	12
Single	EV/MPK4	34	18.2456		Comp	EV/MPK4	36	3.29135		Single	EV/MPK4	35	0.233344		Single	EV/MPK4	32	3.30361		Comp	EV/EV	11	2.173		Single	MPK4/MPK4	17	18.3		Single	MPK4/MPK4	19	8
Single	EV/MPK4	35	12.7595		Comp	EV/MPK4	37	3.24308		Comp	EV/MPK4	36	0.152259		Single	EV/MPK4	33	3.16992		Comp	MPK4/MPK4	25	1.454		Comp	EV/EV	10	41.84		Comp	EV/EV	54	8
Comp	EV/MPK4	36	7.93214		Comp	EV/MPK4	38	4.24002		Comp	EV/MPK4	37	0.177902		Single	EV/MPK4	35	3.99174		Single	MPK4/MPK4	17	2.252		Comp	EV/MPK4	37	29.96		Comp	MPK4/MPK4	27	11
Comp	EV/MPK4	37	9.3566		Comp	EV/MPK4	39	3.50142		Comp	EV/MPK4	38	0.360245		Comp	EV/MPK4	36	2.40999		Comp	EV/EV	10	2.264		Single	EV/EV	2	21.72		Comp	EV/EV	13	6
Comp	EV/MPK4	38	12.758		Comp	EV/MPK4	40	2.4827		Comp	EV/MPK4	39	0.324792		Comp	EV/MPK4	37	2.8851		Comp	EV/MPK4	37	2.108		Comp	EV/EV	8	40.22		Single	EV/EV	6	15
Comp	EV/MPK4	39	12.93		Comp	EV/MPK4	42	3.25147		Comp	EV/MPK4	40	0.121067		Comp	EV/MPK4	38	3.00895		Single	EV/EV	2	3.403		Comp	MPK4/MPK4	22	31.02		Single	MPK4/MPK4	20	8
Comp	EV/MPK4	40	8.79283							Comp	EV/MPK4	41	0.31497		Comp	EV/MPK4	39	3.69279		Comp	EV/EV	8	2.202		Comp	EV/MPK4	36	38.38		Comp	EV/EV	55	10
Comp	EV/MPK4	42	11.8163							Comp	EV/MPK4	42	0.265366		Comp	EV/MPK4	40	3.54164		Comp	MPK4/MPK4	22	0.973							Comp	EV/MPK4	42	8
															Comp	EV/MPK4	41	2.47213												Single	EV/MPK4	35	13
															Comp	EV/MPK4	42	3.63416												Single	MPK4/MPK4	63	6
																														Single	EV/MPK4	77	10
																														Comp	EV/MPK4	84	11
																														Single	EV/MPK4	76	10
																														Single	EV/EV	48	6
																														Single	EV/MPK4	34	9
																														Single	MPK4/MPK4	62	8
																														Comp	MPK4/MPK4	69	5
																														Comp	EV/MPK4	41	8
																														Comp	EV/MPK4	83	6
																														Single	EV/MPK4	75	13
																														Single	EV/EV	47	9
																														Comp	MPK4/MPK4	26	4
																														Single	EV/MPK4	33	11
																														Comp	EV/MPK4	40	10
																														Single	MPK4/MPK4	61	6
																														Single	MPK4/MPK4	18	5
																														Single	EV/MPK4	32	10
																														Comp	MPK4/MPK4	67	5
																														Comp	EV/EV	11	7
																														Comp	MPK4/MPK4	25	3
																														Single	MPK4/MPK4	60	6
																														Single	MPK4/MPK4	17	7
																														Comp	EV/EV	52	14
																														Comp	EV/EV	10	10
																														Single	MPK4/MPK4	59	6
																														Single	EV/MPK4	72	13
																														Comp	EV/EV	51	8
																														Single	EV/EV	44	9
																														Comp	EV/MPK4	37	9
																														Single	EV/EV	2	13
																														Comp	EV/EV	8	10
																														Single	EV/EV	43	13
																														Comp	EV/MPK4	78	4
																														Comp	MPK4/MPK4	22	4
																														Comp	EV/MPK4	36	6
																														Single	EV/MPK4	71	6
