# Supplementary material for: Determining the scale at which variation in a single gene changes population yields
Source: eLife. 2020 Feb 14;9:e53517. doi: 10.7554/eLife.53517 (PMC7136025; doi:10.7554/eLife.53517)
Supplement: Figure 7—source data 1. [file elife-53517-fig7-data1.xlsx]

## Sheet: Feuil1
Figure 7A									Figure 7B									Figure 7C									Figure 7D									Figure 7E									Figure 7F
Field Row Number	Field Column Number	Population Number	Plant ID	% irMPK4 in Population	AMF Interaction	Genotype	Diameter (cm)		Field Row Number	Field Column Number	Population Number	Plant ID	% irMPK4 in Population	AMF Interaction	Genotype	Shoot Biomass (g)		Field Row Number	Field Column Number	Population Number	Plant ID	% irMPK4 in Population	AMF Interaction	Genotype	Root Biomass (g)		Field Row Number	Field Column Number	Population Number	Part of the Plot	% irMPK4 in Population	AMF Interaction	Genotype	Unripe Seed Capsules (#)		Field Row Number	Field Column Number	Population Number	Part of the Plot	% irMPK4 in Population	AMF Interaction	Genotype	Ripe Seed Capsules (#)		% irMPK4 in Population	AMF Interaction	Genotype	log(Shoot Biomass)	log(Ripe Seed Capsules)
1	3	3	5	25	Yes	EVxEV	2.57		2	1	4	7	75	Yes	EVxEV	18.998		2	1	4	7	75	Yes	EVxEV	2.227		3	1	6	1	25	Yes	EVxEV	43		2	1	4	1	75	Yes	EVxEV	6		75	Yes	EVxEV	2.99563	1.94591
2	1	4	7	75	Yes	EVxEV	4.21		3	1	6	11	25	Yes	EVxEV	3.82		3	1	6	11	25	Yes	EVxEV	0.445		3	3	8	1	25	Yes	EVxEV	64		3	1	6	1	25	Yes	EVxEV	16		25	Yes	EVxEV	1.57277	4.09434
3	1	6	11	25	Yes	EVxEV	3.23		3	3	8	15	25	Yes	EVxEV	5.812		3	3	8	15	25	Yes	EVxEV	0.949		5	1	11	1	100	Yes	EVxEV	69		3	3	8	1	25	Yes	EVxEV	29		25	Yes	EVxEV	1.91869	4.54329
3	2	7	13	75	Yes	EVxEV	3.73		5	3	13	29	75	Yes	EVxEV	9.445		5	3	13	29	75	Yes	EVxEV	1.235		5	1	11	1	100	Yes	EVxEV	54		5	1	11	1	0	Yes	EVxEV	24		0	No	EVxCC	0.979829	3.68888
3	3	8	15	25	Yes	EVxEV	3.56		7	1	16	35	75	Yes	EVxEV	1.138		7	1	16	35	75	Yes	EVxEV	0.165		5	3	13	1	75	Yes	EVxEV	43		5	1	11	1	0	Yes	EVxEV	23		0	No	EVxCC	0.945461	3.73767
5	1	11	23	0	Yes	EVxEV	3.11		7	3	18	39	25	Yes	EVxEV	6.892		7	3	18	39	25	Yes	EVxEV	0.762		7	1	16	1	75	Yes	EVxEV	4		5	3	13	1	75	Yes	EVxEV	10		75	Yes	EVxEV	2.34612	3.98898
5	1	11	24	0	Yes	EVxEV	3.8		14	3	56	127	0	Yes	EVxEV	10.13		14	3	56	127	0	Yes	EVxEV	1.649		7	3	18	1	25	Yes	EVxEV	90		7	1	16	1	75	Yes	EVxEV	20		25	No	EVxCC	1.44031	4.69135
5	1	11	25	0	Yes	EVxEV	3.94		14	3	56	129	0	Yes	EVxEV	12.89		14	3	56	129	0	Yes	EVxEV	1.959		14	3	56	1	100	Yes	EVxEV	59		7	3	18	1	25	Yes	EVxEV	15		75	Yes	EVxEV	0.759871	3.21888
5	1	11	26	0	Yes	EVxEV	3.42		19	5	70	163	25	Yes	EVxEV	18.696		19	5	70	163	25	Yes	EVxEV	2.567		14	3	56	1	100	Yes	EVxEV	21		5	4	34	1	0	Yes	EVxEV	17		25	Yes	EVxEV	2.06585	4.66344
5	3	13	29	75	Yes	EVxEV	3.61		20	3	71	165	25	Yes	EVxEV	23.109		24	5	83	193	25	Yes	EVxEV	0.901		24	5	83	1	25	Yes	EVxEV	50		5	4	34	1	0	Yes	EVxEV	25		75	No	EVxCC	1.05187	2.56495
7	1	16	35	75	Yes	EVxEV	3.75		24	5	83	193	25	Yes	EVxEV	8.847		25	4	84	195	25	Yes	EVxEV	2.45		26	3	86	1	75	Yes	EVxEV	52		14	3	56	1	0	Yes	EVxEV	30		0	No	EVxCC	1.48501	3.97029
7	3	18	39	25	Yes	EVxEV	4.13		25	4	84	195	25	Yes	EVxEV	22.232		26	3	86	199	75	Yes	EVxEV	1.657		13	1	103	2	25	Yes	EVxEV	8		14	3	56	1	0	Yes	EVxEV	22		0	No	EVxCC	1.47362	3.80666
9	1	21	45	25	Yes	EVxEV	2.58		26	3	86	199	75	Yes	EVxEV	14.056		27	5	90	209	25	Yes	EVxEV	1.345		15	2	109	2	75	Yes	EVxEV	3		19	5	70	1	25	Yes	EVxEV	21		0	No	EVxCC	1.62551	3.09104
1	5	25	55	75	Yes	EVxEV	4.93		27	5	90	209	25	Yes	EVxEV	12.971		28	5	93	217	75	Yes	EVxEV	1.488		17	1	113	2	75	Yes	EVxEV	0		20	3	71	1	25	Yes	EVxEV	37		0	No	EVxCC	1.78859	2.30259
4	3	31	67	75	Yes	EVxEV	5		28	5	93	217	75	Yes	EVxEV	12.097		13	1	103	239	25	Yes	EVxEV	0.808		20	1	121	2	100	Yes	EVxEV	0		24	5	83	1	25	Yes	EVxEV	41		0	No	EVxCC	1.51886	3.04452
5	4	34	73	0	Yes	EVxEV	5.05		13	1	103	239	25	Yes	EVxEV	6.176		15	2	109	253	75	Yes	EVxEV	0.572		23	1	128	2	25	Yes	EVxEV	6		25	4	84	1	25	Yes	EVxEV	34		25	No	EVxCC	1.4488	4.63473
5	4	34	74	0	Yes	EVxEV	4.47		15	2	109	253	75	Yes	EVxEV	3.259		17	1	113	261	75	Yes	EVxEV	0.182		23	3	130	2	75	Yes	EVxEV	0		26	3	86	1	75	Yes	EVxEV	52		25	No	EVxCC	1.4144	3.63759
5	4	34	75	0	Yes	EVxEV	5.05		17	1	113	261	75	Yes	EVxEV	1.209		20	1	121	283	0	Yes	EVxEV	0.645		24	1	131	2	100	Yes	EVxEV	0		27	5	90	1	25	Yes	EVxEV	52		75	No	EVxCC	1.77665	4.45435
5	4	34	76	0	Yes	EVxEV	4.54		20	1	121	283	0	Yes	EVxEV	5.86		23	1	128	297	25	Yes	EVxEV	0.357		24	1	131	2	100	Yes	EVxEV	0		11	2	99	2	75	Yes	EVxEV	5		0	Yes	EVxEV	2.40964	4.49981
6	3	36	81	25	Yes	EVxEV	4.99		23	1	128	297	25	Yes	EVxEV	2.491		27	1	139	321	25	Yes	EVxEV	0.561		24	1	131	2	100	Yes	EVxEV	1		13	3	105	2	25	Yes	EVxEV	3		0	Yes	EVxEV	2.63117	3.78419
8	5	43	97	0	Yes	EVxEV	4.13		27	1	139	321	25	Yes	EVxEV	5.036		27	2	140	323	0	Yes	EVxEV	2.892		27	1	139	2	25	Yes	EVxEV	0		15	2	109	2	75	Yes	EVxEV	32		75	No	EVxCC	2.68212	3.85015
8	5	43	98	0	Yes	EVxEV	5.02		27	2	140	324	0	Yes	EVxEV	8.683		27	2	140	324	0	Yes	EVxEV	0.945		27	2	140	2	100	Yes	EVxEV	79		17	1	113	2	75	Yes	EVxEV	12		25	No	EVxCC	2.33554	5.15329
8	5	43	99	0	Yes	EVxEV	4.4		27	2	140	325	0	Yes	EVxEV	8.683		27	2	140	325	0	Yes	EVxEV	0.709		27	2	140	2	100	Yes	EVxEV	0		20	1	121	2	0	Yes	EVxEV	0		25	Yes	EVxEV	2.98042	5.35659
8	5	43	100	0	Yes	EVxEV	5.19		27	2	140	326	0	Yes	EVxEV	22.471		27	2	140	326	0	Yes	EVxEV	2.33		27	2	140	2	100	Yes	EVxEV	80		20	1	121	2	0	Yes	EVxEV	2		25	Yes	EVxEV	3.18259	6.06379
12	3	51	117	75	Yes	EVxEV	4.4		1	1	1	1	100	Yes	MPxEV	1.746		1	1	1	1	100	Yes	MPxEV	0.165		29	2	143	2	25	Yes	EVxEV	29		20	1	121	2	0	Yes	EVxEV	0		25	Yes	EVxEV	2.28717	4.52179
12	5	53	121	75	Yes	EVxEV	5.05		1	1	1	2	100	Yes	MPxEV	1.295		1	1	1	2	100	Yes	MPxEV	0.26		1	1	1	1	100	Yes	MPxEV	8		20	1	121	2	0	Yes	EVxEV	26		25	Yes	EVxEV	3.14553	5.84644
14	3	56	127	0	Yes	EVxEV	4.91		3	1	6	12	25	Yes	MPxEV	2.688		3	1	6	12	25	Yes	MPxEV	0.261		1	1	1	1	100	Yes	MPxEV	1		20	2	122	2	75	Yes	EVxEV	0		75	Yes	EVxEV	2.71178	4.65396
14	3	56	128	0	Yes	EVxEV	4.45		3	3	8	16	25	Yes	MPxEV	5.587		3	3	8	16	25	Yes	MPxEV	0.543		3	1	6	1	25	Yes	MPxEV	37		23	1	128	2	25	Yes	EVxEV	25		25	No	EVxCC	1.68417	4.26268
14	3	56	129	0	Yes	EVxEV	2.77		6	2	15	33	100	Yes	MPxEV	9.12		6	2	15	33	100	Yes	MPxEV	1.204		3	3	8	1	25	Yes	MPxEV	35		23	3	130	2	75	Yes	EVxEV	19		0	No	EVxCC	2.35944	4.67283
14	3	56	130	0	Yes	EVxEV	2.82		7	1	16	36	75	Yes	MPxEV	0.994		7	1	16	36	75	Yes	MPxEV	0.115		6	2	15	1	100	Yes	MPxEV	86		24	1	131	2	0	Yes	EVxEV	14		0	No	EVxCC	2.75283	5.0814
14	5	58	133	75	Yes	EVxEV	5.23		7	3	18	40	25	Yes	MPxEV	4.133		7	3	18	40	25	Yes	MPxEV	0.437		7	1	16	1	75	Yes	MPxEV	4		24	1	131	2	0	Yes	EVxEV	10		0	No	EVxCC	1.86918	3.73767
16	3	61	141	25	Yes	EVxEV	4.62		2	4	27	59	100	Yes	MPxEV	4.846		2	4	27	59	100	Yes	MPxEV	0.606		7	3	18	1	25	Yes	MPxEV	50		24	1	131	2	0	Yes	EVxEV	26		25	Yes	EVxEV	2.63698	5.15329
17	4	64	147	0	Yes	EVxEV	5.04		2	4	27	60	100	Yes	MPxEV	4.481		2	4	27	60	100	Yes	MPxEV	0.567		9	2	22	1	100	Yes	MPxEV	27		24	1	131	2	0	Yes	EVxEV	3		75	Yes	EVxEV	2.57238	5.20401
17	4	64	148	0	Yes	EVxEV	4.13		19	5	70	164	25	Yes	MPxEV	8.118		19	5	70	164	25	Yes	MPxEV	0.816		2	4	27	1	100	Yes	MPxEV	41		27	1	139	2	25	Yes	EVxEV	34		75	No	EVxCC	1.31103	3.73767
17	4	64	149	0	Yes	EVxEV	3.74		20	5	73	169	100	Yes	MPxEV	4.067		20	5	73	169	100	Yes	MPxEV	0.515		2	4	27	1	100	Yes	MPxEV	54		27	2	140	2	0	Yes	EVxEV	39		25	Yes	EVxEV	1.97074	4.64439
17	4	64	150	0	Yes	EVxEV	3.63		20	5	73	170	100	Yes	MPxEV	2.477		20	5	73	170	100	Yes	MPxEV	0.302		19	5	70	1	25	Yes	MPxEV	67		27	2	140	2	0	Yes	EVxEV	49		25	No	EVxCC	1.20597	3.91202
18	5	68	157	0	Yes	EVxEV	4.41		24	3	81	189	100	Yes	MPxEV	6.834		24	3	81	189	100	Yes	MPxEV	0.72		20	3	71	1	25	Yes	MPxEV	37		29	2	143	2	25	Yes	EVxEV	70		75	Yes	EVxEV	1.44903	3.58352
18	5	68	158	0	Yes	EVxEV	5.04		24	3	81	190	100	Yes	MPxEV	0.545		24	3	81	190	100	Yes	MPxEV	0.044		20	5	73	1	100	Yes	MPxEV	30		1	1	1	1	100	Yes	MPxEV	4		75	Yes	EVxEV	0.79254	2.56495
18	5	68	159	0	Yes	EVxEV	5.62		24	5	83	194	25	Yes	MPxEV	9.146		24	5	83	194	25	Yes	MPxEV	0.747		20	5	73	1	100	Yes	MPxEV	17		1	1	1	1	100	Yes	MPxEV	13		75	No	EVxCC	1.40168	3.73767
18	5	68	160	0	Yes	EVxEV	4.57		25	4	84	196	25	Yes	MPxEV	7.289		25	4	84	196	25	Yes	MPxEV	0.716		24	3	81	1	100	Yes	MPxEV	103		2	1	4	1	75	Yes	MPxEV	13		0	Yes	EVxEV	1.92571	0
19	5	70	163	25	Yes	EVxEV	5.4		27	5	90	210	25	Yes	MPxEV	3.094		27	5	90	210	25	Yes	MPxEV	0.221		24	3	81	1	100	Yes	MPxEV	10		3	1	6	1	25	Yes	MPxEV	13		25	No	EVxCC	3.2447	5.50939
20	3	71	165	25	Yes	EVxEV	5.5		28	5	93	218	75	Yes	MPxEV	8.864		28	5	93	218	75	Yes	MPxEV	0.944		24	5	83	1	25	Yes	MPxEV	97		3	3	8	1	25	Yes	MPxEV	38		25	Yes	EVxEV	1.25019	3.46574
20	4	72	167	75	Yes	EVxEV	4.74		11	1	98	227	100	Yes	MPxEV	3.781		11	1	98	227	100	Yes	MPxEV	0.37		25	4	84	1	25	Yes	MPxEV	59		6	2	15	1	100	Yes	MPxEV	21		25	Yes	EVxEV	1.79774	3.55535
22	5	78	181	0	Yes	EVxEV	4.51		21	3	125	292	100	Yes	MPxEV	8.885		21	3	125	292	100	Yes	MPxEV	1.373		27	5	90	1	25	Yes	MPxEV	28		7	1	16	1	75	Yes	MPxEV	18		0	Yes	EVxEV	3.34339	5.51343
22	5	78	182	0	Yes	EVxEV	4.57		23	1	128	298	25	Yes	MPxEV	4.3		23	1	128	298	25	Yes	MPxEV	0.545		28	5	93	1	75	Yes	MPxEV	69		7	3	18	1	25	Yes	MPxEV	10		0	Yes	EVxEV	2.27037	1.09861
22	5	78	183	0	Yes	EVxEV	4.36		25	2	134	314	100	Yes	MPxEV	9.803		25	2	134	314	100	Yes	MPxEV	1.259		11	1	98	2	100	Yes	MPxEV	1		9	2	22	1	100	Yes	MPxEV	23		0	Yes	EVxEV	2.27037	3.68888
22	5	78	184	0	Yes	EVxEV	3.84		27	1	139	322	25	Yes	MPxEV	4.468		27	1	139	322	25	Yes	MPxEV	0.392		11	1	98	2	100	Yes	MPxEV	3		2	4	27	1	100	Yes	MPxEV	24		0	Yes	EVxEV	3.15577	4.86753
24	5	83	193	25	Yes	EVxEV	4.64																				21	3	125	2	100	Yes	MPxEV	30		2	4	27	1	100	Yes	MPxEV	22		25	No	EVxCC	1.60282	3.8712
25	4	84	195	25	Yes	EVxEV	2.97																				23	1	128	2	25	Yes	MPxEV	7		19	5	70	1	25	Yes	MPxEV	19
26	3	86	199	75	Yes	EVxEV	4.56																				25	2	134	2	100	Yes	MPxEV	18		20	3	71	1	25	Yes	MPxEV	17
27	5	90	209	25	Yes	EVxEV	3.95																				27	1	139	2	25	Yes	MPxEV	0		20	5	73	1	100	Yes	MPxEV	25
28	5	93	217	75	Yes	EVxEV	5.51																				29	2	143	2	25	Yes	MPxEV	9		20	5	73	1	100	Yes	MPxEV	26
29	4	94	219	75	Yes	EVxEV	4.66																													24	3	81	1	100	Yes	MPxEV	36
1	1	1	1	100	Yes	MPxEV	2.31																													24	3	81	1	100	Yes	MPxEV	8
1	1	1	2	100	Yes	MPxEV	2.33																													24	5	83	1	25	Yes	MPxEV	25
1	3	3	6	25	Yes	MPxEV	2.62																													25	4	84	1	25	Yes	MPxEV	18
2	1	4	8	75	Yes	MPxEV	3.37																													27	5	90	1	25	Yes	MPxEV	22
2	2	5	9	100	Yes	MPxEV	3.86																													11	1	98	2	100	Yes	MPxEV	24
2	2	5	10	100	Yes	MPxEV	2.67																													11	1	98	2	100	Yes	MPxEV	35
3	1	6	12	25	Yes	MPxEV	2.66																													11	2	99	2	75	Yes	MPxEV	5
3	2	7	14	75	Yes	MPxEV	2.81																													15	2	109	2	75	Yes	MPxEV	2
3	3	8	16	25	Yes	MPxEV	4.05																													17	2	114	2	100	Yes	MPxEV	3
5	3	13	30	75	Yes	MPxEV	3.12																													20	2	122	2	75	Yes	MPxEV	1
6	2	15	33	100	Yes	MPxEV	3.27																													21	3	125	2	100	Yes	MPxEV	37
6	2	15	34	100	Yes	MPxEV	3.21																													23	3	130	2	75	Yes	MPxEV	1
7	1	16	36	75	Yes	MPxEV	3.52																													25	2	134	2	100	Yes	MPxEV	39
7	3	18	40	25	Yes	MPxEV	3.04																													27	1	139	2	25	Yes	MPxEV	26
9	1	21	46	25	Yes	MPxEV	3.07																													28	2	143	2	100	Yes	MPxEV	0
9	2	22	47	100	Yes	MPxEV	3.87																													29	2	143	2	25	Yes	MPxEV	42
9	2	22	48	100	Yes	MPxEV	3.47
1	5	25	56	75	Yes	MPxEV	4.04
2	4	27	59	100	Yes	MPxEV	3.11
2	4	27	60	100	Yes	MPxEV	3.37
4	3	31	68	75	Yes	MPxEV	3.08
4	5	33	71	100	Yes	MPxEV	2.38
4	5	33	72	100	Yes	MPxEV	2.77
6	3	36	82	25	Yes	MPxEV	4.56
6	5	38	85	100	Yes	MPxEV	3.78
6	5	38	86	100	Yes	MPxEV	4.4
8	3	41	93	100	Yes	MPxEV	3.32
8	3	41	94	100	Yes	MPxEV	4.95
10	4	47	107	100	Yes	MPxEV	3.09
10	4	47	108	100	Yes	MPxEV	4.39
12	3	51	118	75	Yes	MPxEV	4.46
12	5	53	122	75	Yes	MPxEV	2.73
13	4	54	123	100	Yes	MPxEV	5.06
13	4	54	124	100	Yes	MPxEV	4.96
14	5	58	134	75	Yes	MPxEV	4.19
15	5	60	140	25	Yes	MPxEV	4.38
16	3	61	142	25	Yes	MPxEV	3.23
19	5	70	164	25	Yes	MPxEV	4.45
20	3	71	166	25	Yes	MPxEV	4.44
20	4	72	168	75	Yes	MPxEV	3.48
20	5	73	169	100	Yes	MPxEV	4.05
20	5	73	170	100	Yes	MPxEV	4.22
22	4	77	180	100	Yes	MPxEV	4.31
24	3	81	189	100	Yes	MPxEV	4.96
24	3	81	190	100	Yes	MPxEV	4.71
24	5	83	194	25	Yes	MPxEV	3.42
25	4	84	196	25	Yes	MPxEV	4.25
26	3	86	200	75	Yes	MPxEV	4.54
27	5	90	210	25	Yes	MPxEV	3.71
28	3	91	211	100	Yes	MPxEV	4.28
28	3	91	212	100	Yes	MPxEV	4.64
29	4	94	220	75	Yes	MPxEV	4.51
